# Supplementary material for: Protocol for DexEnceph: a randomised controlled trial of dexamethasone therapy in adults with herpes simplex virus encephalitis
Source: PubMed Central journal article supplement (PMC8728349; doi:10.1136/bmjopen-2020-041808), 2021-07-21
Supplement: bmjopen-2020-041808.draft_revisions.pdf [file bmjopen-2020-041808.draft_revisions.pdf]

# BMJ Open

BMJ Open is committed to open peer review. As part of this commitment we make the peer review history of every article we publish publicly available.

When an article is published we post the peer reviewers' comments and the authors' responses online. We also post the versions of the paper that were used during peer review. These are the versions that the peer review comments apply to.

The versions of the paper that follow are the versions that were submitted during the peer review process. They are not the versions of record or the final published versions. They should not be cited or distributed as the published version of this manuscript.

BMJ Open is an open access journal and the full, final, typeset and author-corrected version of record of the manuscript is available on our site with no access controls, subscription charges or pay-per-view fees (<http://bmjopen.bmj.com>).

If you have any questions on BMJ Open's open peer review process please email [info.bmjopen@bmj.com](mailto:info.bmjopen@bmj.com)

# BMJ Open

## Protocol for DexEnceph; a randomised controlled trial of dexamethasone therapy in adults with Herpes Simplex Virus Encephalitis

|                               |                                                                                                                                                                                                                                                                                                                                                                                                                                                                                                                                                                                                                                                                                                                                                                                                                                                                                                                                                                                                                                                                                                                                                                                                                                                                                                                                                                                                                                                                                                                                                                                                                                                                                                                                                                                                                                                                                                                                                                                                                                                                            |
|-------------------------------|----------------------------------------------------------------------------------------------------------------------------------------------------------------------------------------------------------------------------------------------------------------------------------------------------------------------------------------------------------------------------------------------------------------------------------------------------------------------------------------------------------------------------------------------------------------------------------------------------------------------------------------------------------------------------------------------------------------------------------------------------------------------------------------------------------------------------------------------------------------------------------------------------------------------------------------------------------------------------------------------------------------------------------------------------------------------------------------------------------------------------------------------------------------------------------------------------------------------------------------------------------------------------------------------------------------------------------------------------------------------------------------------------------------------------------------------------------------------------------------------------------------------------------------------------------------------------------------------------------------------------------------------------------------------------------------------------------------------------------------------------------------------------------------------------------------------------------------------------------------------------------------------------------------------------------------------------------------------------------------------------------------------------------------------------------------------------|
| Journal:                      | <i>BMJ Open</i>                                                                                                                                                                                                                                                                                                                                                                                                                                                                                                                                                                                                                                                                                                                                                                                                                                                                                                                                                                                                                                                                                                                                                                                                                                                                                                                                                                                                                                                                                                                                                                                                                                                                                                                                                                                                                                                                                                                                                                                                                                                            |
| Manuscript ID                 | bmjopen-2020-041808                                                                                                                                                                                                                                                                                                                                                                                                                                                                                                                                                                                                                                                                                                                                                                                                                                                                                                                                                                                                                                                                                                                                                                                                                                                                                                                                                                                                                                                                                                                                                                                                                                                                                                                                                                                                                                                                                                                                                                                                                                                        |
| Article Type:                 | Protocol                                                                                                                                                                                                                                                                                                                                                                                                                                                                                                                                                                                                                                                                                                                                                                                                                                                                                                                                                                                                                                                                                                                                                                                                                                                                                                                                                                                                                                                                                                                                                                                                                                                                                                                                                                                                                                                                                                                                                                                                                                                                   |
| Date Submitted by the Author: | 17-Jun-2020                                                                                                                                                                                                                                                                                                                                                                                                                                                                                                                                                                                                                                                                                                                                                                                                                                                                                                                                                                                                                                                                                                                                                                                                                                                                                                                                                                                                                                                                                                                                                                                                                                                                                                                                                                                                                                                                                                                                                                                                                                                                |
| Complete List of Authors:     | Whitfield, Thomas; University of Liverpool, Brain Infections Unit<br>Fernandez, Cristina; University of Liverpool, Brain Infections Unit<br>Defres, Sylviane; Institute of Infection and Global Health, Clinical infection, medical microbiology and Immunology; Royal Liverpool and Broadgreen University Hospitals Trust, Tropical infectious diseases Unit<br>Griffiths, Michael; University of Liverpool, Brain Infections Unit; Alder Hey Children's NHS Foundation Trust, Neurology<br>Hooper, Cory; University of Liverpool, Brain Infections Unit<br>Tangney, Rebecca; Aintree University Hospitals NHS Foundation Trust<br>Davies, Kelly; University of Liverpool, Clinical Trials Research Centre<br>Burnside, Girvan; University of Liverpool Faculty of Health and Life Sciences, Biostatistics<br>Rosala- Hallas, Anna; University of Liverpool Faculty of Health and Life Sciences, Biostatistics<br>Moore, Perry; The Walton Centre NHS Foundation Trust, Dept of Clinical Neuropsychology<br>Das, Kumar; The Walton Centre NHS Foundation Trust<br>Zuckerman, Mark; King's College Hospital NHS Foundation Trust, South London Specialist Virology Centre<br>Parkes, Laura; University of Manchester Institute of Science and Technology Department of Biomolecular Science,<br>Keller, Simon; Aintree University Hospitals NHS Foundation Trust<br>Roberts, Neil; The University of Edinburgh The Queen's Medical Research Institute<br>Easton, Ava; The Encephalitis Society<br>Touati, Saber; CHU Grenoble Alpes, Service des Maladies Infectieuses et Tropicales<br>Kneen, Rachel; Alder Hey Children's NHS Foundation Trust, Department of Neurology;; Institute of Infection and Global Health, Clinical Infection, medical microbiology and Immunology<br>Stahl, JP; Infectious Diseases Department, University of Grenoble<br>Solomon, Tom; Institute of Infection and Global Health, University of Liverpool; National Institute for Health Research Health Protection Research Unit in Emerging and Zoonotic Infections, University of Liverpool |
| Keywords:                     | Neurology < INTERNAL MEDICINE, VIROLOGY, NEUROLOGY, Neurological injury < NEUROLOGY                                                                                                                                                                                                                                                                                                                                                                                                                                                                                                                                                                                                                                                                                                                                                                                                                                                                                                                                                                                                                                                                                                                                                                                                                                                                                                                                                                                                                                                                                                                                                                                                                                                                                                                                                                                                                                                                                                                                                                                        |

1  
2  
3  
4  
5  
6  
7  
8  
9  
10  
11  
12  
13  
14  
15  
16  
17  
18  
19  
20  
21  
22  
23  
24  
25  
26  
27  
28  
29  
30  
31  
32  
33  
34  
35  
36  
37  
38  
39  
40  
41  
42  
43  
44  
45  
46  
47  
48  
49  
50  
51  
52  
53  
54  
55  
56  
57  
58  
59  
60

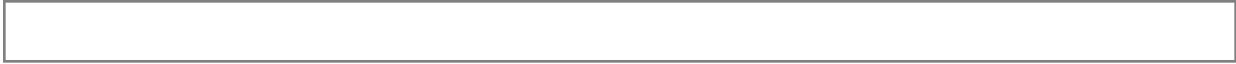

SCHOLARONE™  
Manuscripts

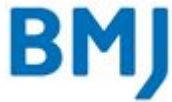

I, the Submitting Author has the right to grant and does grant on behalf of all authors of the Work (as defined in the below author licence), an exclusive licence and/or a non-exclusive licence for contributions from authors who are: i) UK Crown employees; ii) where BMJ has agreed a CC-BY licence shall apply, and/or iii) in accordance with the terms applicable for US Federal Government officers or employees acting as part of their official duties; on a worldwide, perpetual, irrevocable, royalty-free basis to BMJ Publishing Group Ltd ("BMJ") its licensees and where the relevant Journal is co-owned by BMJ to the co-owners of the Journal, to publish the Work in this journal and any other BMJ products and to exploit all rights, as set out in our [licence](#).

The Submitting Author accepts and understands that any supply made under these terms is made by BMJ to the Submitting Author unless you are acting as an employee on behalf of your employer or a postgraduate student of an affiliated institution which is paying any applicable article publishing charge ("APC") for Open Access articles. Where the Submitting Author wishes to make the Work available on an Open Access basis (and intends to pay the relevant APC), the terms of reuse of such Open Access shall be governed by a Creative Commons licence – details of these licences and which [Creative Commons](#) licence will apply to this Work are set out in our licence referred to above.

Other than as permitted in any relevant BMJ Author's Self Archiving Policies, I confirm this Work has not been accepted for publication elsewhere, is not being considered for publication elsewhere and does not duplicate material already published. I confirm all authors consent to publication of this Work and authorise the granting of this licence.

1  
2  
3  
4  
5  
6  
7  
8  
9  
10  
11  
12  
13  
14  
15  
16  
17  
18  
19  
20  
21  
22  
23  
24  
25  
26  
27  
28  
29  
30  
31  
32  
33  
34  
35  
36  
37  
38  
39  
40  
41  
42  
43  
44  
45  
46  
47  
48  
49  
50  
51  
52  
53  
54  
55  
56  
57  
58  
59  
60

1 **Protocol for DexEnceph; a randomised controlled trial of dexamethasone therapy in adults**  
2 **with Herpes Simplex Virus Encephalitis**

3 The study is funded by the National Institute for Health Research’s Efficacy and Mechanism  
4 Evaluation (EME) programme.

5  
6 The trial sponsor is the University of Liverpool, who are responsible for all aspects of study  
7 design, implementation, analysis and write up (sponsor@liverpool.ac.uk).

8  
For peer review only

1  
2  
3  
4 9  
5 10  
6 11  
7 12  
8 13  
9 14  
10 15  
11 16  
12 17  
13 18  
14 19  
15 20  
16 21  
17 22  
18 23  
19 24  
20 25  
21 26  
22 27  
23 28  
24 29  
25 30  
26 31  
27 32  
28 33  
29 34  
30 35  
31 36  
32 37  
33 38  
34 39  
35 40  
36 41  
37 42  
38 43  
39 44  
40 45  
41 46  
42 47  
43 48  
44 49  
45 50  
46 51  
47 52  
48 53  
49 54  
50 55  
51 56  
52 57  
53 58  
54 59  
55 60

Dr Tom Whitfield  
Brain Infections Group  
Institute of Global Health  
Ronald Ross Building  
University of Liverpool  
Liverpool  
L7 3EA  
July 17, 2019

18 Dear Mr Adrian Aldcroft,

19 We wish to submit the 'Protocol for the DexEnceph; a randomised controlled trial of  
20 dexamethasone therapy in adults with herpes simplex virus encephalitis' for consideration by  
21 BMJ open. We confirm that this work is original and has not been published elsewhere, nor is  
22 it currently under consideration for publication elsewhere.

24 In this paper, we outline our design of the DexEnceph trial, which will be the first completed  
25 randomised controlled trial of corticosteroids in herpes simplex encephalitis. DexEnceph is  
26 designed to answer the longstanding question of whether using steroids as  
27 immunomodulation in herpes simplex encephalitis is effective and has the potential to change  
28 global practice. We hope it will give insight into treatment options for managing a condition  
29 that still has a high mortality rate and commonly leaves sufferers with devastating long-term  
30 sequelae.

32 We believe that this manuscript is appropriate for publication by BMJ open because in  
33 addition to its relevance to clinical practice, the protocol also outlines how the trial is uniquely  
34 and pragmatically designed to counter logistic difficulties of recruiting participants who  
35 present acutely with a very rare disease sporadic disease. This is of use and interest to other  
36 researchers in less common acute conditions. The manuscript is 5000 words in length, in order  
37 to cover both the SPIRIT checklist and the additional unique features of the trial. The trial is  
38 currently in progress and has recruited over 75% of trial participants, this adds legitimacy to  
39 the approach taken where previous trials have been unsuccessful.

41 Please address all correspondence concerning this manuscript to me at [tw1@liverpool.ac.uk](mailto:tw1@liverpool.ac.uk).

42 Thank you for your consideration of this manuscript.

43 Sincerely,

44 Tom Whitfield

1  
2  
3 48 **Article Summary**  
4  
5 49  
6  
7 50 **Strengths and weaknesses**  
8

9 51 **'Strengths and limitations of this study'**, and containing up to five short bullet points, no  
10 52 longer than one sentence each, that relate specifically to the methods.  
11  
12 53

- 13 54     ▪ DexEnceph will be the first completed randomised controlled trial of steroid in herpes  
14 55     simplex virus encephalitis, examining the utility and safety of steroid use.  
16 56  
17 57     ▪ The trial will provide important information to improve outcomes in a devastating  
18 58     disease with a high rates of mortality and severe sequelae.  
20 59  
21 60     ▪ Herpes simplex virus encephalitis is a rare sporadic disease which presents acutely,  
22 61     with low numbers of expected patients (approximately 1-2 per year) at each recruiting  
23 62     hospital. Screening and site engagement are key to ensuring trial success.  
24 63  
25 64     ▪ The pragmatic open label, observer blind design of the trial is ensuring successful  
26 65     recruitment to date.  
27 66  
28 67     ▪ The recruitment target is informed by the recent Enceph-UK programme grant of  
29 68     encephalitis in the UK; the trial is currently open and has recruited 71 patients of a  
30 69     target 90.  
31 70  
32 71  
33  
34  
35  
36  
37  
38  
39  
40  
41  
42  
43  
44  
45  
46  
47  
48  
49  
50  
51  
52  
53  
54  
55  
56  
57  
58  
59  
60

1  
2  
3 **72 Abstract**  
4

5  
6 **73 Introduction**  
7

8  
9 74 Herpes simplex virus (HSV) encephalitis is a severe form of brain inflammation that  
10  
11 75 commonly leaves survivors and their families with devastating long-term consequences. The  
12  
13  
14 76 virus particularly targets the temporal lobe of the brain causing debilitating memory  
15  
16 77 problems, especially in verbal memory. It is postulated that immunomodulation with  
17  
18 78 steroids could improve outcomes by reducing brain swelling. However, there are concerns  
19  
20 79 (so far not observed) that such immunosuppression might facilitate increased viral  
21  
22  
23 80 replication with resultant worsening of disease. A previous trial closed early because of slow  
24  
25  
26 81 recruitment.  
27  
28

29 **82 Method**  
30

31  
32 83 DexEnceph is a pragmatic multicentre, randomised, controlled, open label, observer-blind  
33  
34 84 trial to determine whether adults who receive dexamethasone alongside standard  
35  
36 85 treatment with aciclovir for HSV encephalitis have improved clinical outcomes compared  
37  
38 86 with those who receive standard treatment alone. Overall, 90 patients with HSV  
39  
40 87 encephalitis will be recruited from a target of 90 recruiting sites; patients will be  
41  
42 88 randomised 1:1 to the dexamethasone or control arms of the study. The primary outcome  
43  
44 89 measured is verbal memory as assessed by the Weschler Memory Scale fourth edition  
45  
46  
47 90 Auditory Memory Index at 26 weeks post randomisation. Secondary outcomes are  
48  
49  
50 91 measured up to 72 weeks include additional neuropsychological, clinical and functional  
51  
52  
53 92 outcomes as well as comparison of neuroimaging findings. Patient safety monitoring occurs  
54  
55  
56 93 throughout and includes the detection of HSV DNA in cerebrospinal fluid 2 weeks after  
57  
58  
59 94 randomisation, which is indicative of ongoing viral replication.  
60



1  
2  
3 95 **Discussion**  
4  
5

6 96  
7  
8

9 97 DexEnceph aims to be the first completed randomised controlled trial of steroid therapy in  
10  
11 98 HSV encephalitis. The results will provide evidence for future practice in managing adults with  
12  
13  
14 99 the condition and has the potential to improve outcomes in a life-changing disease.  
15

16  
17 100

18  
19 101 **Ethical approval**  
20

21 102 The trial has ethical approval from the UK National Research Ethics committee (Liverpool  
22  
23  
24 103 Central, REF: 15/NW/0545, 10/08/2015). Protocol version 2.1 July 2019  
25

26 104 **Registration numbers**  
27

28  
29 105 ISRCTN11774734, EUDRACT 2015-001609-16  
30  
31 106  
32  
33 107

34  
35 108 Key words: Herpes simplex, Encephalitis, Dexamethasone, Steroid, Verbal memory  
36  
37 109

38  
39  
40 110 Authors: Whitfield T,<sup>1</sup> Fernandez C,<sup>1</sup> Davies K,<sup>2</sup> Defres S<sup>1, 13, 15</sup>, Griffiths M,<sup>1, 14</sup> Hooper C,<sup>1</sup>  
41

42  
43 111 Tangney R,<sup>3</sup> Burnside G,<sup>4</sup> Rosalas-Hallas A,<sup>4</sup> Moore P,<sup>12</sup> Das K,<sup>5</sup> Zuckerman M,<sup>6</sup> Parkes L,<sup>7</sup>,  
44

45 112 Keller S,<sup>3</sup> Roberts N,<sup>8</sup> Easton A,<sup>1,9</sup> Touati S,<sup>10</sup> Kneen R,<sup>1,14</sup> JP Stahl<sup>11</sup> & Solomon T<sup>1, 5, 15</sup>  
46  
47  
48 113

49  
50  
51 114 1. Institute of Infection and Global Health, University of Liverpool, L69 7BE, United  
52  
53  
54 115 Kingdom  
55

56 116 2. Clinical Trials Research Centre, University of Liverpool, L12 2AP, United Kingdom  
57  
58

59 117 3. University Hospital Aintree, L9 7AL, United Kingdom  
60

- 1  
2  
3 118 4. Department of Biostatistics, University of Liverpool, L69 3GL, United Kingdom  
4  
5  
6 119 5. The Walton Centre NHS Foundation Trust, L9 7JL, United Kingdom  
7  
8 120 6. South London Specialist Virology Centre, Kings College Hospital NHS Foundation Trust,  
9  
10 121 SE5 9RS, United Kingdom  
11  
12  
13 122 7. Division of Neuroscience and Experimental Psychology, Faculty of Biology Medicine  
14  
15 123 and Health, University of Manchester, M13 9NT, United Kingdom  
16  
17  
18 124 8. Queens Medical Research Institute, University of Edinburgh, EH16 4TJ, United  
19  
20 125 Kingdom  
21  
22  
23 126 9. Encephalitis Society, Malton, North Yorkshire, YO17 7DT, United Kingdom  
24  
25 127 10. Département de Recherche Clinique (DRC), Grenoble Cedex, France  
26  
27  
28 128 11. Infectious Diseases Department, University and Hospital Grenoble Alpes, Grenoble  
29  
30 129 Cedex, France  
31  
32  
33 130 12. Salford Royal NHS Foundation Trust, M6 8HD, United Kingdom  
34  
35 131 13. Tropical Infectious diseases Unit, Royal Liverpool University Hospital, L7 8XP, United Kingdom  
36  
37 132 14. Alder Hey NHS Foundation Trust, Liverpool, L14 5AB, United Kingdom  
38  
39  
40 133 15. NIHR Health Protection Research Unit on Emerging and Zoonotic Infections, Liverpool, L69  
41  
42 134 7BE, United Kingdom  
43  
44

45 135 Correspondence & trial sponser: [tsolomon@liverpool.ac.uk](mailto:tsolomon@liverpool.ac.uk)  
46  
47

48 136 Word Count : 4916 words  
49  
50  
51 137  
52  
53  
54 138  
55  
56  
57 139  
58  
59  
60

## 140 **Background**

141 Herpes simplex virus infection (HSV) is the most commonly identified viral cause of  
142 encephalitis, inflammation and swelling of the brain caused by a virus or the body's immune  
143 system, in the UK as in most western industrialised nations.<sup>1-4</sup> The incidence has been  
144 estimated at 1 in 250,000-500,000,<sup>2</sup> with evidence this may be higher.<sup>4</sup> Although a rare  
145 disease, HSV encephalitis has a disproportionately large impact due to its devastating long  
146 term neuro-psychological sequelae . These can have a marked impact on the quality of life of  
147 the patient and their family and high health economic and social costs.<sup>5,6</sup>

148 Since the introduction of the antiviral drug aciclovir in the 1970s the mortality of HSV  
149 encephalitis has reduced from around 70% to 5.5-12%.<sup>7-9</sup> However, survivors are commonly  
150 left with neurological impairment; less than 20% of patients are able to return to work and  
151 48% are classed as moderate to severely disabled.<sup>10</sup> Even when obvious disabilities have not  
152 occurred, families often report personality changes – the person they take home from  
153 hospital is simply not the same as the one before the illness. <sup>6,11</sup>

154 HSV encephalitis can cause a broad range of cognitive impairments, but impaired memory,  
155 especially verbal memory, is the most common and likely relates to the viral predilection for  
156 the temporal lobe of the brain. <sup>12,13</sup> The verbal memory deficits manifest as difficulties  
157 remembering names of objects and people, as well as listening to and recalling spoken  
158 information such as conversations. <sup>14,15</sup> In addition to memory problems, difficulties in  
159 processing speed, concentration, language and executive function are also common amongst  
160 survivors of HSV encephalitis, along with fatigue, poor concentration, anxiety and depression.

161 <sup>7,16,17</sup>

1  
2  
3 162 The pathogenic mechanisms in HSV encephalitis are not fully understood. The evidence  
4  
5  
6 163 suggests that in addition to direct viral pathogenesis, inflammation of the brain in response  
7  
8 164 to the virus is a key component of the disease process.<sup>18–21</sup> This is supported by the  
9  
10  
11 165 observation that in the cerebrospinal fluid (CSF), higher levels of proinflammatory  
12  
13 166 chemokines, especially monocyte chemotactic protein (MCP)-1, interferon  $\gamma$  and interleukin  
14  
15 167 6 (IL-6) are associated with a worse prognosis.<sup>22,23</sup> Poor prognosis is also associated with the  
16  
17  
18 168 extent of inflammation seen on neuroimaging,<sup>24</sup> and the degree of temporal lobe swelling is  
19  
20 169 correlated with the severity of verbal memory impairment.<sup>25</sup>

21  
22  
23  
24 170 Control of the inflammation in HSV encephalitis may improve outcome, as shown in mouse  
25  
26 171 models of the disease.<sup>26–28</sup> Before the availability of aciclovir, corticosteroids were also used  
27  
28  
29 172 routinely as a treatment in humans with HSV encephalitis,<sup>29,30</sup> and more recently both  
30  
31 173 cerebral oedema on imaging and cerebrospinal fluid IL-6 levels were shown to be reduced in  
32  
33 174 patients given corticosteroids.<sup>23</sup> However, because corticosteroids cause  
34  
35  
36 175 immunosuppression which in theory facilitates increased viral replication, their role is  
37  
38 176 uncertain.<sup>31</sup>

39  
40  
41 177 In other brain infections, including bacterial meningitis and tuberculous meningitis the benefit  
42  
43 178 of corticosteroids has been demonstrated in large clinical trials.<sup>32</sup> For HSV encephalitis the  
44  
45 179 potential benefit of using corticosteroid as an adjunct to aciclovir therapy has been suggested  
46  
47 180 from small case series and retrospective comparisons, but there has been no prospective  
48  
49 181 randomised study reported.<sup>33–38</sup> One study, the German trial of Aciclovir and Corticosteroids  
50  
51 182 in Herpes simplex virus Encephalitis (the GACHE trial) was stopped early because of poor  
52  
53 183 recruitment rates.<sup>39</sup> However, there is clearly a need for a study to assess this question. The  
54  
55  
56  
57  
58  
59  
60

1  
2  
3 184 DexEnceph Study, a randomised controlled trial of dexamethasone in HSV encephalitis, aims  
4  
5  
6 185 to achieve this.  
7  
8

9 186

10  
11  
12 187 **Trial design**  
13

14  
15 188 DexEnceph is a pragmatic, multicentre, randomised, controlled, observer-blind trial to  
16  
17 189 determine whether the addition of dexamethasone to standard aciclovir treatment improves  
18  
19 190 clinical outcomes (in particular verbal memory score) for adults with HSV encephalitis.  
20  
21 191 Additionally, neuroimaging and biomarkers will be assessed along with detection of HSV in  
22  
23 192 the cerebrospinal fluid at 2 weeks post randomisation to monitor for difference in viral  
24  
25 193 replication between the two groups.  
26  
27  
28  
29

30 194

31  
32  
33 195 **Primary objective**  
34

35  
36 196 To determine whether a short course of intravenous dexamethasone, in addition to standard  
37  
38 197 care, improves verbal memory score in adults with HSV encephalitis at 26 weeks post  
39  
40 198 treatment compared to standard care alone.  
41  
42  
43

44 199

45  
46  
47 200 **Secondary objectives**  
48

49  
50 201 Secondary objectives include the following:  
51  
52

53  
54 202 To determine whether dexamethasone therapy has an effect on other neuropsychological,  
55  
56 203 cognitive, clinical, disability and functional outcomes in HSV encephalitis.  
57  
58  
59  
60

1  
2  
3 204 To assess the effect of dexamethasone therapy on brain swelling assessed by neuroimaging  
4  
5  
6 205 imaging.

7  
8  
9 206 To determine whether dexamethasone therapy affects clearance of HSV from cerebrospinal  
10  
11 207 fluid, the emergence of anti-N-Methyl-D Aspartic acid (NMDA) receptor antibody or causes  
12  
13 208 any changes in transcriptomic and proteomic profiling in the CSF and blood.

14  
15  
16 209

17  
18 210 A more comprehensive list of measures is detailed in the outcomes section.

19  
20  
21 211

## 22 23 24 212 **Methods**

25  
26  
27 213 DexEnceph is an observer blind, open label, prospective, randomised, controlled trial of  
28  
29 214 dexamethasone at 10mg four times daily for 4 days, versus no dexamethasone, in adults with  
30  
31  
32 215 HSV encephalitis.

## 33 34 35 216 **Research setting**

36  
37  
38 217 The trial is being conducted in up to 45 NHS trusts, with a recruitment target of 0-2 patients  
39  
40 218 per site per year. A full list of sites involved in DexEnceph can be obtained from  
41  
42  
43 219 [www.dexenceph.org.uk](http://www.dexenceph.org.uk)

## 44 45 46 220 **Eligibility criteria**

### 47 48 49 221 **Inclusion Criteria**

50  
51  
52 222 Enrolled patients fulfil all of the following criteria:

53  
54 223

55  
56  
57 224 1. Suspected encephalitis defined as: new onset seizure OR new focal neurological signs OR  
58  
59 225 alteration in consciousness, cognition, personality, or behaviour. Personality / behaviour  
60

1  
2  
3 226 change includes agitation, psychosis, somnolence, insomnia, catatonia, mood lability, altered  
4  
5  
6 227 sleep pattern.

7  
8 228

9  
10 229 2. A positive HSV DNA polymerase chain reaction (PCR) result from CSF, reported not more  
11  
12  
13 230 than 7 days prior to randomisation.

14  
15 231

16  
17  
18 232 3. Receiving intravenous aciclovir administered as 10mg/kg three times daily or at a reduced  
19  
20  
21 233 dose if clinically indicated.

22  
23 234

24  
25  
26 235 4. Age  $\geq$  16 years.

27  
28 236

29  
30 237 5. Written informed consent given by the patient or their legal representative<sup>40</sup>

31  
32 238

33  
34  
35  
36 239 **Exclusion Criteria**

37  
38  
39 240 Patients are excluded if they have any of the following:

40  
41  
42 241 1. Have received oral or injectable corticosteroid therapy in the 30 days prior to the day of  
43  
44 242 admission to hospital. This does not apply to topical/ inhaled corticosteroids. [Patients who  
45  
46 243 have received oral or injectable corticosteroid therapy AFTER their admission to hospital will  
47  
48  
49 244 not be excluded from the study if they consent to trial participation].

50  
51 245

52  
53  
54 246 2. History of hypersensitivity to corticosteroids.

55  
56 247

57  
58  
59 248 3. Immunosuppression secondary to:

60

- 1  
2  
3 249 a. Known HIV infection and CD4 white cell count under 200/mm<sup>3</sup>  
4  
5  
6 250 b. Currently taking biologic therapy or other immunosuppressive agents [e.g.  
7  
8 251 azathioprine, methotrexate, ciclosporin]  
9  
10 252 c. Previous solid organ transplant and currently on immunosuppression  
11  
12  
13 253 d. Previous bone marrow transplant  
14  
15 254 e. Currently undergoing a course of chemotherapy or radiotherapy  
16  
17  
18 255 f. Known primary immunodeficiency syndrome  
19  
20 256 g. Known current haematological malignancy  
21  
22  
23 257  
24  
25 258 4. Pre-existing indwelling ventricular devices.  
26  
27  
28 259  
29  
30 260 5. Peptic ulcer disease in the last 6 months, defined as a peptic ulcer seen at endoscopy or  
31  
32 261 an upper gastrointestinal bleed causing a  $\geq 2$ unit haemoglobin drop, in the last 6 months.  
33  
34  
35 262  
36  
37 263 6. Antiretroviral regime containing rilpivirine as current treatment [Levels of rilpivirine are  
38  
39 264 known to significantly decrease in co-administration with dexamethasone, a switch to a  
40  
41 265 suitable alternative can facilitate trial entry].  
42  
43  
44  
45 266

#### 267 **Intervention**

268 Participants are randomised in a 1:1 ratio to dexamethasone four times daily for four days  
269 alongside standard care, or standard care alone (Figure 1). Standard care includes intravenous  
270 aciclovir for a minimum of 14 days based on an ideal body weight at 10mg/kg every 8 hours,  
271 unless dose adjustment to account for renal impairment is necessary. Participating clinicians



1  
2  
3 272 remain free to modify or discontinue the dexamethasone administration or to give alternative  
4  
5  
6 273 treatments at any stage, if this is judged to be in the best interest of the patient.  
7

8 274  
9

10 275 Participants assigned dexamethasone receive 10 mg equivalent of ordinary ward stock,  
11  
12  
13 276 prescribed by an authorised member of the local study team, given intravenously four times  
14  
15 277 daily for four days (16 doses in total) starting within 24 hours of randomisation.  
16  
17

18 278  
19

20 279 The University of Liverpool employs a clinical trials unit to be responsible for screening, and  
21  
22  
23 280 monitoring data collection, quality and completeness. As there is a low number of  
24  
25 281 participants to be recruited, the trials unit are able to liaise regularly with each site following  
26  
27 282 randomisation to ensure all follow up data are collected. Primary outcome is recorded by a  
28  
29 283 centrally employed roving neuropsychologist, who collects the neuropsychological outcomes  
30  
31  
32 284 at 26 and 72 weeks.  
33  
34

35 285  
36

37 286  
38

39 287  
40

41 288  
42

43 289  
44

45 290  
46

47 291  
48

49 292  
50

51 293  
52

53 294  
54

55 295  
56  
57  
58  
59  
60

1  
2  
3 296 **Outcome measures**  
4  
5

6 297 **Primary Outcome**  
7  
8

9 298 Verbal memory score, determined by the Wechsler Memory Scale 4<sup>th</sup> edition (WMS-IV)

10  
11  
12 299 Auditory Memory Index, at 26 weeks after randomisation.  
13  
14

15 300 **Secondary Outcomes**  
16  
17

18 301 Other neuropsychological outcome measures [at 26 weeks and 78 weeks after  
19  
20 302 randomisation]:  
21  
22

23 303 • Verbal memory score, determined by the WMS-IV, Auditory Memory Index, at 78  
24  
25 304 weeks after randomisation.  
26  
27

28 305 • Visual, Immediate and Delayed Memory by Indexes of the WMS-IV, processing speed  
29  
30 and working memory subscales from the Wechsler Adult Intelligence Scale Fourth  
31 306 Edition.  
32  
33 307  
34

35  
36 308 • Higher executive function using the Trail Making Test.  
37

38 309 • Anxiety and Depression symptom levels by the Beck Depression Inventory and Beck  
39  
40 Anxiety Inventory.  
41 310  
42

43 311 • Subjective cognitive complaints using the Perceived Deficits Questionnaire.  
44  
45

46 312 Cognitive Outcome Measures [at discharge or 30 days if still in hospital, 26 weeks and 78  
47  
48 313 weeks]  
49

50 314 • Addenbrooke's Cognitive Assessment III.  
51  
52

53 315 **Clinical Outcomes**  
54

55 316 • Incidence of epilepsy.  
56  
57

58 317 • Time to hospital discharge.  
59  
60

- 1  
2  
3 318 • Requirement of high dependency unit or Intensive care unit admission up to 30 days  
4  
5  
6 319 post randomisation.  
7  
8 320 • Time taken to be free of ventilatory support for 14 days [if any].  
9  
10  
11 321 • Time to reach maximum recorded Glasgow coma scale score.  
12  
13 322 • Survival.
- 15 323 Disability & Functional Outcomes [at discharge or 30 days if still in hospital, 26 weeks and 78  
16  
17 weeks]:  
18 324  
19  
20 325 • Modified Rankin Score, Barthel Index, Liverpool Outcome Score and Glasgow  
21  
22 Outcome Scale Extended.  
23 326
- 25 327 Imaging Outcomes: Change from Baseline at 2 weeks, 26 weeks and 78 weeks  
26  
27  
28 328 • Temporal lobe volume (as % of intra-cranial volume).  
29  
30 329 • Whole brain volume (as % of intra-cranial volume).  
31  
32  
33 330 • Volume of affected region as seen on fluid-attenuated inversion recovery (FLAIR)  
34  
35 331 image (as % of intra-cranial volume).  
36  
37  
38 332 • Volume of affected region as seen on diffusion-weighted image (as % of intra-cranial  
39  
40 333 volume).  
41  
42
- 43 334 Biomarker Outcomes:  
44  
45 335 • Transcriptomic and proteomic profiling on blood at convalescence (2 weeks and 26  
46  
47 336 weeks), compared to acute baselines, and on CSF at 2 weeks compared to acute  
48  
49 baseline.  
50 337  
51  
52 338 • Anti-NMDA receptor antibody testing at 26 weeks.  
53  
54
- 55 339 Safety Outcomes:  
56  
57 340 • Proportion of patients with detectable HSV in CSF by PCR at 2 weeks.  
58  
59
- 60 341 Health Status and Quality of Life [at 26 and 78 weeks]:

- 1  
2  
3 342       • Measured by the EuroQoL-5 Dimension-5 Level quality of life scale (EQ-5D-5L) and 36  
4  
5  
6 343       item short form survey (SF-36) self-completed questionnaires.  
7  
8  
9 344

10  
11 345   **Screening**  
12

13  
14 346   The majority of potential patients are identified by the local research team through  
15  
16 347   identifying patients with a relevant clinical presentation suspicious of HSV encephalitis and/or  
17  
18 348   detection of HSV in a CSF sample. A screening log is completed for all potential patients. A  
19  
20 349   strong link with the local laboratory is essential as a key factor in ensuring eligible patients are  
21  
22 350   not missed by the investigative team. Investigators for the local research team include  
23  
24 351   neurologists, infectious disease clinicians, microbiologist and virologists.  
25  
26  
27  
28 352

29  
30 353   Because this is an uncommon disease, extra measures have been taken to try and maximise  
31  
32 354   recruitment. On identifying a suitable patient, sites are able to contact the trial management  
33  
34 355   team for intensive support via a dedicated telephone hotline, email, or an app. Short videos  
35  
36 356   which explain the trial to patients, families and to health care workers also support  
37  
38 357   recruitment. Every month, the trial management group monitor the screening reports of each  
39  
40 358   site for the previous 3 months, to ensure they are actively looking for patients. Lower than  
41  
42 359   expected screening is followed up by the central study team making contact with the study  
43  
44 360   site to review their screening methodology and offer support.  
45  
46  
47  
48  
49

50 361

51 362

52  
53  
54  
55 363   **Randomisation**  
56

57  
58 364   Participants are randomised using a 24-hour secure web-based programme, which is centrally  
59  
60 365   controlled by the clinical trials research centre. Designated members of the trial team at the

1  
2  
3 366 site (detailed on the delegation of responsibilities log) are provided with a unique username  
4  
5  
6 367 and password which is required to access the web-based randomisation system. In the event  
7  
8 368 of system failure, the patient can be randomised centrally electronically or through secure  
9  
10 369 envelopes. Each participant is allocated a unique study number (randomisation number), the  
11  
12  
13 370 primary identifier for all the participants in this study.

14  
15 371

16  
17  
18 372 The neuropsychologist collecting the primary outcome and other outcome assessors such as  
19  
20 373 radiologists and those responsible for paper authorship are blinded to randomisation during  
21  
22  
23 374 the trial. Trial participants and local site study teams, as well as the trial manager and trial  
24  
25 375 data manager at the clinical trials unit are aware of what treatments have been allocated. The  
26  
27  
28 376 independent data safety and monitoring committee (IDSMC) and statisticians have access to  
29  
30 377 unblinded data grouped by intervention throughout the trial and make recommendations to  
31  
32  
33 378 the trial's steering committee who would only become unblinded in the event of a serious  
34  
35 379 event.

36  
37 380

### 38 381 **Participant timeline**

39  
40  
41  
42  
43 382 The time schedule for enrolment, interventions and assessments is given in table 1.

44  
45  
46 383

### 47 48 49 384 **Statistical Considerations**

50  
51 385

### 52 53 54 386 **Sample Size**

55  
56 387 The primary outcome variable is verbal memory , assessed as part of WMS-IV. In one  
57  
58  
59 388 published series of adults who survived HSV encephalitis, 19 of 22 had memory impairment  
60

1  
2  
3 389 evident at follow up, with verbal memory being most severely affected <sup>12</sup>. In that study the  
4  
5  
6 390 mean (standard deviation, SD) verbal memory score was 88.9 (18.9) compared with the  
7  
8 391 population mean (SD) of 100 <sup>15</sup>. This score can only be assessed in survivors, we estimate  
9  
10 392 approximately 10% of patients in the trial will die before assessment of the primary  
11  
12  
13 393 outcome<sup>8,41,42</sup>. In instances where the death is judged to be associated with encephalitis the  
14  
15 394 verbal memory score is recorded as 40, (the lowest possible value which would be obtained  
16  
17 395 even where a patient recorded no recall of any of the items administered in the memory  
18  
19 396 subtests). Where the cause of death is thought to be independent of having encephalitis,  
20  
21 397 those patients will be recorded as lost to follow up. Similarly, for patients who are too unwell,  
22  
23 398 due to encephalitis, to undergo the assessment, the score is recorded as 40. Decisions as to  
24  
25 399 whether the reasons for death or non-completion of the measures were due to encephalitis  
26  
27 400 will be made by an independent committee blinded to dexamethasone allocation. Adjusting  
28  
29 401 the estimate of mean and standard deviation from survivors, to include the 10% of patients  
30  
31 402 with the lowest possible value of 40, gives a total population mean of 84.8, with a standard  
32  
33 403 deviation of 23.1. A final sample size of 36 participants per group allows us to detect a  
34  
35 404 clinically meaningful difference of 15.5 on the verbal memory score with 80% power, at a two-  
36  
37 405 sided significance level of 0.05. Allowing for up to 20% dropout gives an initial target sample  
38  
39 406 size of 45 participants per group, for a total of 90.  
40  
41  
42  
43  
44  
45  
46  
47  
48  
49

#### 408 **Statistical analysis**

50  
51  
52 409 For the primary outcome, participants are included in the analysis based on the intention-to-  
53  
54 410 treat principle. Verbal memory score will be compared between groups using linear  
55  
56 411 regression. The model will be adjusted for pre-specified variables which are judged to be  
57  
58  
59  
60

1  
2  
3 412 potentially related to the outcome, including age and admission Glasgow coma scale score.  
4  
5

6 413 No interim analysis is planned, but there is regular monitoring by the IDSMC.  
7  
8

9 414  
10

11 415 As there may be some missing primary outcome data due to death, inability to complete the  
12

13 416 assessment, or loss to follow up, a sensitivity analysis will be carried out. All randomised  
14

15 417 patients will be included in this analysis.  
16  
17

18 418  
19

20 419 For continuous secondary outcome variables, comparisons between groups will be analysed  
21

22 420 as per the primary outcome. The results for residual viral presence in the CSF at 2 weeks will  
23

24 421 be reported with a 95% confidence interval for the difference in proportions between groups.  
25  
26

27 422 Time to event outcomes will be analysed using Kaplan-Meier curves, log rank tests and Cox  
28

29 423 Proportional Hazards models. Binary secondary outcomes will be analysed using logistic  
30

31 424 regression.  
32  
33

34 425  
35  
36

### 37 38 426 **Trial Promotion and engagement** 39

40 427 Considerable effort is maintained to keep the principal investigators, research nurses and the  
41

42 428 community engaged in the trial. The trial is being publicised using public forums, the  
43

44 429 Encephalitis Society website and newsletter, social media, patient journey articles and work  
45

46 430 with newspapers and TV. To promote site engagement, study days are arranged for research  
47

48 431 teams to attend, along with scheduled research nurse teleconferences to allow ideas on  
49

50 432 maximising recruitment and updates on trial progress to be shared. Sites are also kept  
51

52 433 updated through our website ([www.dexenceph.org.uk](http://www.dexenceph.org.uk)), newsletters and an innovative sticker  
53

54 434 chart, whereby a sticker is sent out to every site each time a patient is recruited (Figure 2).  
55  
56  
57  
58  
59  
60

1  
2  
3 435 The Encephalitis Society are playing a key role in providing additional support to the patients  
4  
5  
6 436 and their families aside from their work for the trial.  
7  
8

9 437

### 10 11 438 **Publication and Dissemination**

12  
13 439 The results from different centres will be pooled for analysis and published as soon as the  
14  
15  
16 440 analysis is complete. They will be presented at the annual conference organised by the  
17  
18 441 Encephalitis Society and at other meetings.  
19

20  
21 442

### 22 23 24 443 **Trial Closure**

25  
26  
27 444 The end of the trial is defined to be the date on which data for all participants is frozen and  
28  
29 445 data entry privileges are withdrawn from the trial database. The trial may be closed  
30  
31 446 prematurely by the trial steering committee, on the recommendation of the IDSMC if there is  
32  
33 447 sufficient evidence of risk to patient safety.  
34  
35

### 36 37 448 **Pharmacovigilance**

38  
39  
40 449 Oversight of the trial is provided by the trial steering committee, which meets at least annually  
41  
42 450 to review trial progress, safety, and adverse events. The committee is also informed of any  
43  
44 451 protocol changes by the clinical trial research unit.  
45  
46

47  
48 452 The Medicines for Human Use (Clinical Trials) Regulations 2004 (SI 2004/1031) definitions are  
49  
50 453 used for Adverse Event (AE), Adverse Reaction (AR), Unexpected Adverse Reaction (UAR),  
51  
52 454 Serious Adverse Event (SAE), Serious Adverse Reaction (SAR) or Suspected Unexpected  
53  
54 455 Serious Adverse Reaction (SUSAR).  
55  
56

57  
58  
59 456 Depending on the nature of the event the reporting procedures below are followed:  
60



1  
2  
3 457 1. Serious adverse events occurring up to 30 days after randomisation are reported through  
4  
5  
6 458 a Serious Adverse Event Form (if serious) or in the 30 day/discharge case record forms (CRF)  
7  
8 459 if they are a notable event (Positive PCR in CSF at 2nd lumbar puncture, gastrointestinal bleed,  
9  
10 460 hyperglycaemia requiring change in medical management, opportunistic infections,  
11  
12  
13 461 unexpected/severe neuropsychiatric events).

14  
15  
16 462 2. Serious adverse events occurring after 30 days from randomisation are monitored through  
17  
18 463 reporting in the CRFs with safety data collected in the 26 week and 78-week CRFs if serious.

19  
20  
21 464 The research investigator at each study site (or designated other) assesses all adverse events  
22  
23 465 for seriousness, causality and severity. The Chief Investigator (or designated other) assesses  
24  
25 466 all adverse drug reactions for expectedness from known side effects of the use of  
26  
27 467 Dexamethasone.<sup>43</sup> All serious ARs, AEs and SUSARs occurring up to 30 days from  
28  
29 468 randomisation (apart from death unless the investigator suspects causality) require reporting  
30  
31 469 to the clinical trials unit, within 24 hours of the site becoming aware of the event. In the case  
32  
33 470 of death of a patient causality will be assessed by the trial steering committee.

34  
35  
36 471 The clinical trials unit will notify the Medicines and Healthcare products Regulatory Agency  
37  
38 472 and main research ethics committee of all SUSARs that occur during the study according to  
39  
40 473 the following timelines; fatal and life-threatening within 7 days of notification and non-life  
41  
42 474 threatening within 15 days. All investigators are informed of all SUSARs occurring throughout  
43  
44 475 the study.

45  
46  
47 476 SAEs occurring after 30 days from randomisation are monitored by the clinical trials unit via  
48  
49 477 the 26 week and 78week CRFs. These CRFs need to be received at the clinical trials research  
50  
51 478 unit by 4 weeks after the 26 and 6 weeks after 78week time points.  
52  
53  
54  
55  
56  
57  
58  
59  
60

1  
2  
3 479 Safety data is provided to the IDSMC, who are responsible for safeguarding the interests of  
4  
5  
6 480 trial participants and assessing the safety of the interventions during the trial; the IDSMC  
7  
8 481 ensures action is taken as needed should they become aware of trends in reported AEs that  
9  
10 482 raise safety concerns.  
11  
12  
13  
14 483

## 16 484 **Ethical Considerations**

17  
18 485  
19  
20  
21 486 The trial falls within the remit of the EU Directive 2001/20/EC, transposed into UK law as the  
22  
23 487 UK Statutory Instrument 2004 No 1031: Medicines for Human Use (Clinical Trials) Regulations  
24  
25 488 2004 as amended. This trial is registered with the MHRA and granted Clinical Trial  
26  
27 489 Authorisation (CTA). The EUDRACT number for CTA reference is 2015-001609-16. Ethical  
28  
29 490 approval has been obtained from a multi-centre research ethics committee familiar with the  
30  
31 491 principals of the Mental Capacity Act 2005 guidance for sites in England and Wales and the  
32  
33 492 Adults with Incapacity Act 2008 for sites in Scotland as the principals are relevant to a clinical  
34  
35 493 trial of investigational medicinal products (CTIMP). Clinical Research Governance approval  
36  
37 494 was given through the Sponsor, The University of Liverpool. The trial protocol was approved  
38  
39 495 by a National Research Ethics Service Committee reference is 2015-001609-16 (Attained  
40  
41 496 31/03/2016) and underwent independent review at the Research and Development offices  
42  
43 497 at participating sites. This study abides by the principles of the World Medical Association  
44  
45 498 Declaration of Helsinki (1964) and Tokyo (1975), Venice (1983), Hong Kong (1989) and South  
46  
47 499 Africa (1996). Due to the nature of this trial it also abides by the Medicine for Human Use  
48  
49 500 (Clinical Trials) regulations 2004 (S.I.2004:1031) and all following amendments which are  
50  
51 501 incorporated into UK law.  
52  
53  
54  
55  
56  
57  
58  
59  
60 502

### 503 **Informed Consent Process**

504

505 In obtaining and documenting informed consent, the investigators adhere to National  
506 Institute for Health Research (NIHR) Good Clinical Practice (GCP) guidelines and the ethical  
507 principles derived from the Declaration of Helsinki. Staff delegated by the principal  
508 investigator and appropriately trained with experience in obtaining informed consent, discuss  
509 the objectives, risks and inconveniences of the trial and the conditions under which it is to be  
510 conducted with the patient or if the patient lacks capacity with a legal or professional  
511 representative. Trial information documents and points of contact for further information are  
512 provided and the potential participants are given adequate time to consider their decision.

513

514 As this is a CTIMP, the clinical trial regulations for incapacitated adults are followed  
515 (Medicines for Human Use Clinical Trial Regulations 2004 and amendments). When a legal  
516 representative has given consent for a patient to participate in the trial and the patient  
517 subsequently regains capacity, the research team will provide the patient information sheet  
518 and request consent from the participant. Patients are allowed to withdraw from the study  
519 at any point and may request withdrawal of their data collected until this point. Prospective  
520 consent can also be obtained prior to a positive PCR result so participants may have adequate  
521 time for contemplation.

522

523 As suspected encephalitis is a medical emergency, a deferred consent process is used for the  
524 collection and retention of some samples as part of routine clinical management. Using  
525 emergency deferred consent for samples involves taking additional samples of blood and CSF  
526 only if the procedure is being performed for clinical care. If deferred consent has been used,

1  
2  
3 527 written consent is requested from either the patient or a legal representative as soon as is  
4  
5  
6 528 possible and appropriate, with samples discarded if this is declined. This approach is based on  
7  
8 529 discussions with patients and the public through the Encephalitis Society.  
9

10 530

### 13 531 **Data Capture Methods**

15 532 Data is stored securely in line with the Data Protection Act 1998. The randomisation system,  
16  
17 533 data capture form and CRF have been designed to optimally protect participant information  
18  
19 534 and to maintain confidentiality. Trial data is captured at local sites using paper CRFs. These  
20  
21 535 are then sent into the clinical trials research unit for data entry into the study specific  
22  
23 536 database. Completed CRFs are returned to clinical trial research centre within 7 days of  
24  
25 537 completion. A copy of the CRF sent over to the clinical trials research unit is retained at site.  
26  
27 538 CRFs and consent forms are stored separately and securely at all times in dedicated areas of  
28  
29 539 the clinical trials research unit.  
30  
31  
32  
33  
34

35 540

37 541 CRFs are checked for data quality by the clinical trials research unit in Liverpool responsible  
38  
39 542 for ensuring data collection and storage.  
40  
41

42 543

44 544 Patients' anonymised and labelled neuroimaging data are put on to discs at site and sent to  
45  
46 545 the clinical trials research unit; the images can also be transferred via the Image Exchange  
47  
48 546 Portal in an encrypted manner. The final dataset will be solely accessible to the central study  
49  
50 547 team at the University of Liverpool for analysis and write up.  
51  
52  
53

54 548

56 549

### 59 550 **Trial Funding and Financial Arrangements**

1  
2  
3 551  
4  
5  
6 552 This trial is funded by the NIHR Efficacy and Mechanism Evaluation Programme for the  
7  
8 553 Department of Health. Contractual agreements are in place between the Sponsor and  
9  
10 554 collaborating centres that describe financial arrangements. Trial participants are not paid to  
11  
12 555 participate in the trial but are paid travel expenses for the follow up visits, estimated at £50  
13  
14 556 per visit. Payments to sites are made per site initiation but the bulk of payments are made  
15  
16 557 per patient recruitment. Sites receive payment for: clinical time oversight, research nurse  
17  
18 558 time, administrative support, magnetic resonance imaging scanning and pharmacy oversight.  
19  
20  
21  
22  
23 559  
24

### 560 **Patient and public involvement**

561 The Encephalitis Society was consulted and provided advice on the design of the trial and the  
562 difficulties participants and their families will likely encounter. The Chief Executive of The  
563 Encephalitis Society is a co-applicant on the grant application and a co-author on this paper.

564

565 The Encephalitis Society has also provided patient representatives at our trial steering  
566 committee and assisted in the production and dissemination of trial promotional materials.

567 The Encephalitis Society will drive forward publication and dissemination of the trial findings  
568 among lay, therapeutic and health professionals through the use of web materials,  
569 newsletters and guides as well as at conferences and seminars in relation to encephalitis and  
570 related fields. All patients and their family/carers will be acknowledged in any outputs from  
571 the trial. We also work with The Encephalitis Society on a programme  
572 of teaching events and produce guides for healthcare professionals and lay people.

1  
2  
3 573 In instances where trial participants and their families have ongoing difficulties the central  
4  
5  
6 574 study team seek help for them through the Encephalitis Society and appropriate specialists  
7  
8 575 for further assistance.  
9

10 576

## 13 577 **Discussion**

15 578

18 579 This protocol describes the design of a randomised controlled trial to demonstrate the utility  
19  
20 580 of using dexamethasone in the management of individuals with HSV encephalitis. HSV  
21  
22 581 encephalitis is a rare sporadic acute disease, and the trial has been designed to take this  
23  
24 582 challenge into account, along with the practicalities of running the trial in a UK National Health  
25  
26 583 Service setting. In particular lessons were learnt from a previous similar European study, the  
27  
28 584 German trial of Aciclovir and Corticosteroids in Herpes simplex virus Encephalitis (GACHE  
29  
30 585 trial), which was stopped early because of recruitment difficulties. Recruitment to the GACHE  
31  
32 586 trial necessitated patients had focal neurological signs of no longer than five days prior to  
33  
34 587 admission, whilst DexEnceph has less stringent criteria and reflects the diverse ways in which  
35  
36 588 HSV encephalitis may present. DexEnceph has been designed to be both practical and  
37  
38 589 pragmatic, in that patients must be recruited within 7 days of the PCR result becoming  
39  
40 590 available. This allows for occasions where it may take longer to get the PCR performed, and  
41  
42 591 also allows time for patients admitted to district general hospitals, which may not be study  
43  
44 592 centres, to be transferred to larger hospitals which are. DexEnceph also has the advantage in  
45  
46 593 that its recruitment projections were based on preliminary data garnered from the ENCEPH-  
47  
48 594 UK NIHR program ([www.encephuk.org](http://www.encephuk.org)) and from a multicentre cohort study of encephalitis  
49  
50 595 in England, run by the Health Protection Agency (fore-runner to the Health Protection  
51  
52 596 Agency).<sup>9</sup> These two studies provided direct information on the number of HSV encephalitis

1  
2  
3 597 patients presenting to UK hospitals. Our choice of an open label observer-blind study, rather  
4  
5  
6 598 than a placebo-controlled double-blind trial, avoided the logistic challenges of ensuring  
7  
8 599 blinded study drug was available across the large number of centres, necessitated by a rare  
9  
10  
11 600 sporadic disease, which may also have been a factor in the recruitment difficulties  
12  
13 601 experienced by the GACHE trial. We are confident our robust monitoring and trial promotion  
14  
15 602 ensures the majority of eligible patients are recruited. N- methyl-D-aspartic acid (NMDA)  
16  
17 603 receptor antibody encephalitis (which is treated with corticosteroids and other  
18  
19  
20 604 immunomodulatory therapies) is being recognised increasingly as a late complication of HSV  
21  
22  
23 605 encephalitis.<sup>44,45</sup> DexEnceph may also be able examine whether corticosteroids reduce the  
24  
25 606 incidence of this complication. If there is demonstrable efficacy of corticosteroid in improving  
26  
27  
28 607 neuropsychological, imaging and quality of life outcomes, without compromising patient  
29  
30 608 safety the results will be far reaching.  
31  
32  
33  
34 609

### 36 610 **Collaboration with France**

37  
38  
39  
40 611 Because we recognised from the start that there may be difficulties keeping to recruitment  
41  
42 612 targets in the DexEnceph study, we worked with colleagues in France to develop a parallel  
43  
44  
45 613 French study (DexEnceph-France). This follows the UK DexEnceph protocol as closely as  
46  
47 614 possible, whilst being pragmatic about the constraints of a different country's health care  
48  
49  
50 615 system. The French trial is based in 10 hospitals with the lead centre being Grenoble Alpes  
51  
52 616 University Hospital and the aim of recruiting 30 patients.  
53

54  
55 617 The intention is for the two trials to be analysed separately, with the option of also results  
56  
57 618 also combining them into an overall analysis which will give additional power to detect a  
58  
59  
60 619 treatment effect.

1  
2  
3 6204  
5 6216  
7 6228  
9 62310  
11 624**Trial status**12  
13  
14 625 The trial has been open across the UK since August 2016, and as of July 2019 is open at 4515  
16 626 NHS trusts; 71 patients have been randomised (of the total target of 90) meaning that we17  
18 627 have recruited 79% of the patients are recruiting at just over 80% of the target recruitment19  
20 628 rate. The trial was due to complete recruitment later in 2020 with 6 months follow up and 321  
22 629 months post trial closure for write up. Though recent COVID-19 pandemic has placed23  
24 630 difficulties in conducting trials and paused recruitment, the primary outcome has not been25  
26 631 missed in any existing DexEnceph recruit, this has been achieved by conducting27  
28 632 neuropsychology assessment by either telephone or online video discussion, thus avoiding29  
30 633 any risk of transmission. DexEnceph-France study, which opened in 2018 has recruited 1031  
32 634 patients from 10 sites.33  
34 63535  
36 636 If you are interested to find out more information or to see if your trust is involved visit37  
38 637 [www.dexenceph.org.uk](http://www.dexenceph.org.uk) or for more information please email: [dexenceph@liverpool.ac.uk](mailto:dexenceph@liverpool.ac.uk).39  
40 63841  
42  
43  
44  
45  
46  
47 639 **Dissemination**48  
49 64050  
51 641 The results of the DexEnceph trial will be published in a high impact journal in a timely manner52  
53 642 to present the findings to front-line clinicians. Authorship of the final papers will be54  
55 643 determined in accordance with the international committee of medical journal editors'56  
57  
58  
59  
60



1  
2  
3 644 guidelines. The investigators will be involved in the preparation and drafting of the  
4  
5 645 manuscripts. There is no intended use of professional writers.  
6  
7

8 646

9  
10 647 **Declaration of Interest**

11  
12  
13 648 TS is supported by the National Institute for Health Research (NIHR) Health Protection  
14  
15 649 Research Unit in Emerging and Zoonotic Infections (Grant No. IS-HPU-1112-10117), NIHR  
16  
17 650 Global Health Research Group on Brain Infections (No. 17/63/110), and the European Union's  
18  
19 651 Horizon 2020 research and innovation program ZikaPLAN (Preparedness Latin America  
20  
21  
22 652 Network), grant agreement No. 734584.  
23  
24

25 653

26  
27 654 **Author Statement**

28  
29  
30 655 All authors were consulted and inputted into the article, below lists the particular role  
31  
32 656 within DexEnceph

33  
34  
35 657 TW: Clinical research fellow, CF: Clinical research fellow, KDavies: trials manager, SD: contributor to  
36  
37 658 trial design and running, MG: Clinical and laboratory biomarkers lead, CH: Neuropsychology  
38  
39 659 researcher, RT: trial pharmacist, GB: Trial statistician, AR-H: trial statistician, PM: Neuropsychology  
40  
41 660 lead, KDas: Neuroimaging lead, MZ: Virology, LP: Neuroimaging, SK: Neuroimaging, NR:  
42  
43 661 Neuroimaging, EA: Encephalitis Society Chief Executive advisor, RK: Clinical lead brain infections UK,  
44  
45 662 TS Chief Investigator  
46  
47

48 663

49  
50 664 **Data Statement**

51  
52  
53 665 There are currently no current plans to publish the data  
54  
55

56 666

57  
58 667 **References**  
59  
60

- 1  
2  
3 668  
4  
5  
6 669 1. Davison KL, Crowcroft NS, Ramsay ME, Brown DWG, Andrews NJ. Viral encephalitis in  
7  
8 670 England, 1989-1998: What did we miss? *Emerg Infect Dis*. 2003;9(2):234-240.  
9  
10 671 doi:10.3201/eid0902.020218  
11  
12  
13 672 2. Whitley RJ. Herpes simplex encephalitis: Adolescents and adults. *Antiviral Res*.  
14  
15 673 2006;71(2-3 SPEC. ISS.):141-148. doi:10.1016/j.antiviral.2006.04.002  
16  
17  
18 674 3. Mailles A, Stahl J. Infectious Encephalitis in France in 2007: A National Prospective  
19  
20 675 Study. *Clin Infect Dis*. 2009;49(12):1838-1847. doi:10.1086/648419  
21  
22  
23 676 4. Granerod J, Cousens S, Davies NWS, Crowcroft NS, Thomas SL. New estimates of  
24  
25 677 incidence of encephalitis in England. *Emerg Infect Dis*. 2013;19(9):1455-1462.  
26  
27 678 doi:10.3201/eid1909.130064  
28  
29  
30 679 5. Solomon T, Hart IJ, Beeching NJ, Solomon T, Hart IJ, Beeching NJ. Viral encephalitis : a  
31  
32 680 clinician ' s guide. 2007;(October):288-305. doi:10.1136/jnnp.2007.129098  
33  
34  
35 681 6. Easton A. Encephalitis: raising awareness and collaborating in research. *Lancet*  
36  
37 682 *Neurol*. 2016;15(4):353. doi:10.1016/s1474-4422(16)00059-4  
38  
39  
40 683 7. Mcgrath N, Anderson NE, Croxson MC, Powell KF. Herpes simplex encephalitis treated  
41  
42 684 with acyclovir: diagnosis and long term outcome. *J Neurol Neurosurg Psychiatry*.  
43  
44 685 1997;63:321-326. doi:10.1136/jnnp.63.3.321  
45  
46  
47 686 8. Jouan Y, Grammatico-Guillon L, Espitalier F, Cazals X, François P, Guillon A. Long-term  
48  
49 687 outcome of severe herpes simplex encephalitis: a population-based observational  
50  
51 688 study. *Crit Care*. 2015;19(1):345. doi:10.1186/s13054-015-1046-y  
52  
53  
54 689 9. Granerod J, Ambrose HE, Davies NWS, et al. Causes of encephalitis and differences in  
55  
56 690 their clinical presentations in England: A multicentre, population-based prospective  
57  
58 691 study. *Lancet Infect Dis*. 2010;10(12):835-844. doi:10.1016/S1473-3099(10)70222-X  
59  
60

- 1  
2  
3 692 10. Raschilas F, Wolff M, Delatour F, et al. Outcome of and Prognostic Factors for Herpes  
4  
5  
6 693 Simplex Encephalitis in Adult Patients: Results of a Multicenter Study. *Clin Infect Dis*.  
7  
8 694 2002;35(3):254-260. doi:10.1086/341405  
9  
10 695 11. Egdell R, Egdell D, Solomon T. Herpes simplex virus encephalitis. *Bmj*. 2012;344(jun13  
11  
12 2):e3630-e3630. doi:10.1136/bmj.e3630  
13  
14 696  
15 697 12. Utley TF, Ogden JA, Gibb A, McGrath N, Anderson NE. The long-term  
16  
17 698 neuropsychological outcome of herpes simplex encephalitis in a series of unselected  
18  
19 699 survivors. *Neuropsychiatry Neuropsychol Behav Neurol*. 1997;10(3):180-189.  
20  
21 700 <http://www.ncbi.nlm.nih.gov/pubmed/9297711>.  
22  
23 701 13. Frisch S, Thiel F, Marschhauser A, Villringer A, Horstmann A, Schroeter ML. Identifying  
24  
25 702 neural correlates of memory and language disturbances in herpes simplex  
26  
27 703 encephalitis: a voxel-based morphometry (VBM) study. *J Neurol*. 2015;262(3):563-  
28  
29 704 569. doi:10.1007/s00415-014-7604-4  
30  
31 705 14. Pewter SM, Williams WH, Haslam C, Kay JM. Neuropsychological and psychiatric  
32  
33 706 profiles in acute encephalitis in adults. *Neuropsychol Rehabil*. 2007;17(4-5):478-505.  
34  
35 707 doi:10.1080/09602010701202238  
36  
37 708 15. Hokkanen L, Poutiainen E, Valanne L, et al. Cognitive impairment after acute  
38  
39 709 encephalitis: comparison of herpes simplex and other aetiologies. *Neurosurgery, and*  
40  
41 710 *Psychiatry*. 1996;61(December 1994):478-484. doi:10.1136/jnnp.61.5.478  
42  
43 711 16. Cooper J, Kierans C, Defres S, Easton A, Kneen R, Solomon T. Care beyond the hospital  
44  
45 712 ward: understanding the socio-medical trajectory of herpes simplex virus  
46  
47 713 encephalitis. *BMC Health Serv Res*. 2017;17(1):1-11. doi:10.1186/s12913-017-2608-2  
48  
49 714 17. Cooper J, Kierans C, Defres S, Easton A, Kneen R, Solomon T. Diagnostic pathways as  
50  
51 715 social and participatory practices: The case of herpes simplex encephalitis. *PLoS One*.  
52  
53  
54  
55  
56  
57  
58  
59  
60

- 1  
2  
3 716 2016;11(3):1-15. doi:10.1371/journal.pone.0151145  
4  
5  
6 717 18. Aurelius E, Andersson B, Forsgren M, Sköldenberg B, Strannegård. Cytokines and  
7  
8 718 other markers of intrathecal immune response in patients with herpes simplex  
9  
10 719 encephalitis. *J Infect Dis*. 1994;170(3):678-681. doi:10.1093/infdis/170.3.678  
11  
12  
13 720 19. Sköldenberg B, Aurelius E, Hjalmarsson A, et al. Incidence and pathogenesis of clinical  
14  
15 721 relapse after herpes simplex encephalitis in adults. *J Neurol*. 2006;253(2):163-170.  
16  
17 722 doi:10.1007/s00415-005-0941-6  
18  
19  
20 723 20. Michael BD, Griffiths MJ, Granerod J, et al. Characteristic Cytokine and Chemokine  
21  
22 724 Profiles in Encephalitis of Infectious, Immune-Mediated, and Unknown Aetiology.  
23  
24 725 *PLoS One*. 2016;11(1):e0146288. doi:10.1371/journal.pone.0146288  
25  
26  
27 726 21. Wnęk M, Ressel L, Ricci E, et al. Herpes simplex encephalitis is linked with selective  
28  
29 727 mitochondrial damage; a post-mortem and in vitro study. *Acta Neuropathol*.  
30  
31 728 2016;132(3):433-451. doi:10.1007/s00401-016-1597-2  
32  
33  
34  
35 729 22. Rösler A, Pohl M, Braune HJ, Oertel WH, Gemsa D, Sprenger H. Time course of  
36  
37 730 chemokines in the cerebrospinal fluid and serum during herpes simplex type 1  
38  
39 731 encephalitis. *J Neurol Sci*. 1998;157(1):82-89. doi:10.1016/S0022-510X(98)00061-6  
40  
41  
42 732 23. Kamei S, Taira N, Ishihara M, et al. Prognostic value of cerebrospinal fluid cytokine  
43  
44 733 changes in herpes simplex virus encephalitis. *Cytokine*. 2009;46(2):187-193.  
45  
46 734 doi:10.1016/j.cyto.2009.01.004  
47  
48  
49 735 24. Taira N, Kamei S, Morita a, et al. Predictors of a prolonged clinical course in adult  
50  
51 736 patients with herpes simplex virus encephalitis. *Intern Med*. 2009;48(2):89-94.  
52  
53 737 doi:10.2169/internalmedicine.48.1445  
54  
55  
56  
57 738 25. Kapur N, Barker S, Burrows EH, et al. Herpes simplex encephalitis: long term magnetic  
58  
59 739 resonance imaging and neuropsychological profile. *Neurol Neurosurg Psychiatry*.

- 1  
2  
3 740 1994;5757:1334-1342. doi:10.1136/jnnp.57.11.1334  
4  
5  
6 741 26. Meyding-Lamadé UK, Oberlinner C, Rau PR, et al. Experimental herpes simplex virus  
7  
8 742 encephalitis: a combination therapy of acyclovir and glucocorticoids reduces long-  
9  
10 743 term magnetic resonance imaging abnormalities. *J Neurovirol*. 2003;9(1):118-125.  
11  
12  
13 744 doi:10.1080/13550280390173373  
14  
15 745 27. Sellner J, Dvorak F, Zhou Y, et al. Acute and long-term alteration of chemokine mRNA  
16  
17 746 expression after anti-viral and anti-inflammatory treatment in herpes simplex virus  
18  
19 747 encephalitis. *Neurosci Lett*. 2005;374(3):197-202. doi:10.1016/j.neulet.2004.10.054  
20  
21  
22  
23 748 28. Meyding-lamade U, Seyfer S, Dvorak F, et al. Experimental herpes simplex virus  
24  
25 749 encephalitis: inhibition of the expression of inducible nitric oxide synthase in mouse  
26  
27 750 brain tissue. *Neurosci Lett*. 2002;318:21-24.  
28  
29  
30 751 29. Upton AR., Barwick D., Foster J. DEXAMETHASONE TREATMENT IN HERPES-SIMPLEX  
31  
32 752 ENCEPHALITIS. *Lancet*. 1971;297(7693):290-291. doi:10.1016/S0140-6736(71)91019-1  
33  
34  
35 753 30. Habel AH, Brown JK. DEXAMETHASONE IN HERPES-SIMPLEX ENCEPHALITIS. *Lancet*.  
36  
37 754 1972;299(7752):695. doi:10.1016/S0140-6736(72)90505-3  
38  
39  
40 755 31. Defres S, Keller SS, Das K, et al. A feasibility study of quantifying longitudinal brain  
41  
42 756 changes in herpes simplex virus (HSV) encephalitis using magnetic resonance imaging  
43  
44 757 (MRI) and stereology. *PLoS One*. 2017;12(1):1-15. doi:10.1371/journal.pone.0170215  
45  
46  
47 758 32. de Gans J, van de Beek D. Dexamethasone in Adults with Bacterial Meningitis. *N Engl J*  
48  
49 759 *Med*. 2002;347(20):1549-1556. doi:10.1056/NEJMoa021334  
50  
51  
52 760 33. Kamei S. Evaluation of combination therapy using aciclovir and corticosteroid in adult  
53  
54 761 patients with herpes simplex virus encephalitis. *J Neurol Neurosurg Psychiatry*.  
55  
56 762 2005;76(11):1544-1549. doi:10.1136/jnnp.2004.049676  
57  
58  
59 763 34. Musallam B, Matoth I, Wolf DG, Engelhard D, Averbuch D. Steroids for Deteriorating  
60

- 1  
2  
3 764 Herpes Simplex Virus Encephalitis. *Pediatr Neurol.* 2007;37(3):229-232.  
4  
5  
6 765 doi:10.1016/j.pediatrneurol.2007.05.007  
7  
8 766 35. Maraş Genç H, Uyur Yalçın E, Sayan M, et al. Clinical outcomes in children with herpes  
9  
10 767 simplex encephalitis receiving steroid therapy. *J Clin Virol.* 2016;80:87-92.  
11  
12 768 doi:10.1016/j.jcv.2016.05.002  
13  
14  
15 769 36. Nakano A, Yamasaki R, Miyazaki S, Horiuchi N, Kunishige M, Mitsui T. Beneficial effect  
16  
17 770 of steroid pulse therapy on acute viral encephalitis. *Eur Neurol.* 2003;50(4):225-229.  
18  
19 771 doi:10.1159/000073864  
20  
21  
22 772 37. Lizarraga KJ, Alexandre LC, Ramos-Estebanez C, Merenda A. Are steroids a beneficial  
23  
24 773 adjunctive therapy in the immunosuppressed patient with herpes simplex virus  
25  
26 774 encephalitis? *Case Rep Neurol.* 2013;5(1):52-55. doi:10.1159/000350572  
27  
28  
29 775 38. Mesker AJ, Bon GG, de Gans J, de Kruijk JR. Case report: a pregnant woman with  
30  
31 776 herpes simplex encephalitis successfully treated with dexamethasone. *Eur J Obstet*  
32  
33 777 *Gynecol Reprod Biol.* 2011;154(2):231-232. doi:10.1016/j.ejogrb.2010.10.014  
34  
35  
36 778 39. Martinez-Torres F, Menon S, Pritsch M, et al. Protocol for German trial of Acyclovir  
37  
38 779 and corticosteroids in Herpes-simplex-virus-encephalitis (GACHE): a multicenter,  
39  
40 780 multinational, randomized, double-blind, placebo-controlled German, Austrian and  
41  
42 781 Dutch trial [ISRCTN45122933]. *BMC Neurol.* 2008;8:40. doi:10.1186/1471-2377-8-40  
43  
44  
45 782 40. The Medicines for Human Use (Clinical Trials) Regulations 2004.  
46  
47 783 <http://www.legislation.gov.uk/uksi/2004/1031/schedule/1/made>. Accessed June 19,  
48  
49 784 2019.  
50  
51  
52 785 41. Whitley RJ, Alford CA, Hirsch MS, et al. Vidarabine versus Acyclovir Therapy in Herpes  
53  
54 786 Simplex Encephalitis. *N Engl J Med.* 1986;314(3):144-149.  
55  
56 787 doi:10.1056/NEJM198601163140303  
57  
58  
59  
60

- 1  
2  
3 788 42. Sköldenberg B, Alestig K, Burman L, et al. ACYCLOVIR VERSUS VIDARABINE IN HERPES  
4  
5 789 SIMPLEX ENCEPHALITIS. *Lancet*. 1984;324(8405):707-711. doi:10.1016/S0140-  
6  
7 790 6736(84)92623-0  
8  
9  
10 791 43. Spc. Dexamethasone SPC. 2014;(June):1-4.  
11  
12  
13 792 44. Gilbert GJ, Leypoldt F, Dalmau J. Herpes simplex virus-1 encephalitis can trigger anti-  
14  
15 793 NMDA receptor encephalitis: Case report. *Neurology*. 2014;82(22):2041-2041.  
16  
17 794 doi:10.1212/01.wnl.0000450946.75616.32  
18  
19  
20 795 45. Leypoldt F, Titulaer MJ, Aguilar E, et al. Herpes simplex virus-1 encephalitis can trigger  
21  
22 796 anti-NMDA receptor encephalitis: Case report. *Neurology*. 2013;81(18):1637-1639.  
23  
24 797 doi:10.1212/WNL.0b013e3182a9f531  
25  
26  
27  
28 798  
29  
30 799  
31  
32  
33 800  
34

35 801 **Table 1: Time scale for patients Randomised in the DexEnceph study**  
36  
37 802

| Procedures                         | Follow-up Schedule |          |         |                                                        |          |          |                           |
|------------------------------------|--------------------|----------|---------|--------------------------------------------------------|----------|----------|---------------------------|
|                                    | Screening          | Baseline | 2 weeks | Discharge or Day 30 of admission (whichever is sooner) | 26 weeks | 78 weeks | Premature Discontinuation |
| Signed Consent Form                | X <sup>†</sup>     | X*       |         |                                                        |          |          |                           |
| Assessment of Eligibility Criteria | X                  | X*       |         |                                                        |          |          |                           |
| Review of Medical History          |                    | X*       |         |                                                        |          |          |                           |
| Review of Concomitant Medications  |                    | X*       | X       | X                                                      | X        | X        | X                         |
| Physical Exam                      |                    | X        |         | X                                                      |          |          |                           |
| Study Intervention                 |                    | X        |         |                                                        |          |          |                           |
| Clinical Data Collection           |                    | X        |         | X                                                      | X        | X        |                           |

| Procedures                                       | Follow-up Schedule |                  |                |                                                        |          |          |                           |
|--------------------------------------------------|--------------------|------------------|----------------|--------------------------------------------------------|----------|----------|---------------------------|
|                                                  | Screening          | Baseline         | 2 weeks        | Discharge or Day 30 of admission (whichever is sooner) | 26 weeks | 78 weeks | Premature Discontinuation |
| Magnetic resonance imaging (MRI) scan            |                    | X <sub>μ</sub>   | X              |                                                        | X        | X        |                           |
| Research Blood Testing                           |                    | X                | X              |                                                        | X        |          |                           |
| Lumbar Puncture                                  |                    | X <sub>γ</sub>   | X              |                                                        |          |          |                           |
| Disability & Functional Outcomes                 |                    |                  |                | X                                                      | X        | X        |                           |
| Glasgow Coma Scale                               |                    | X <sub>∞</sub> * | X <sub>∞</sub> | X <sub>∞</sub>                                         | X        | X        |                           |
| Addenbrooke’s Cognitive Examination revised      |                    |                  |                | X                                                      | X        | X        |                           |
| Neuropsychology assessment                       |                    |                  |                |                                                        | X        | X        |                           |
| Health Status and quality of life questionnaires |                    |                  |                |                                                        | X        | X        |                           |
| Clinical Laboratory: Haematology, Biochemistry   |                    | X <sub>α</sub>   |                |                                                        |          |          |                           |
| Assessment of Adverse Events                     |                    |                  | (X)            | (X)                                                    | (X)      | (X)      | (X)                       |

† Only applicable when patients are prospectively consented for the randomised controlled trial

\*Procedures required before randomisation.

μ Baseline MRI done for clinical purposes can be done from hospital admission up to 7 days after randomisation

γ Diagnostic lumbar puncture for clinical purposes done prior to randomisation

α Recording of clinical laboratory tests done for clinical purposes, NOT as part of trial

∞ Recorded prior to randomisation, daily for the first 14 days and then weekly until Discharge/30 days (whichever sooner)

(X) – As indicated/appropriate

Author Statement



Figure 1: Schematic Design of Randomised controlled trial

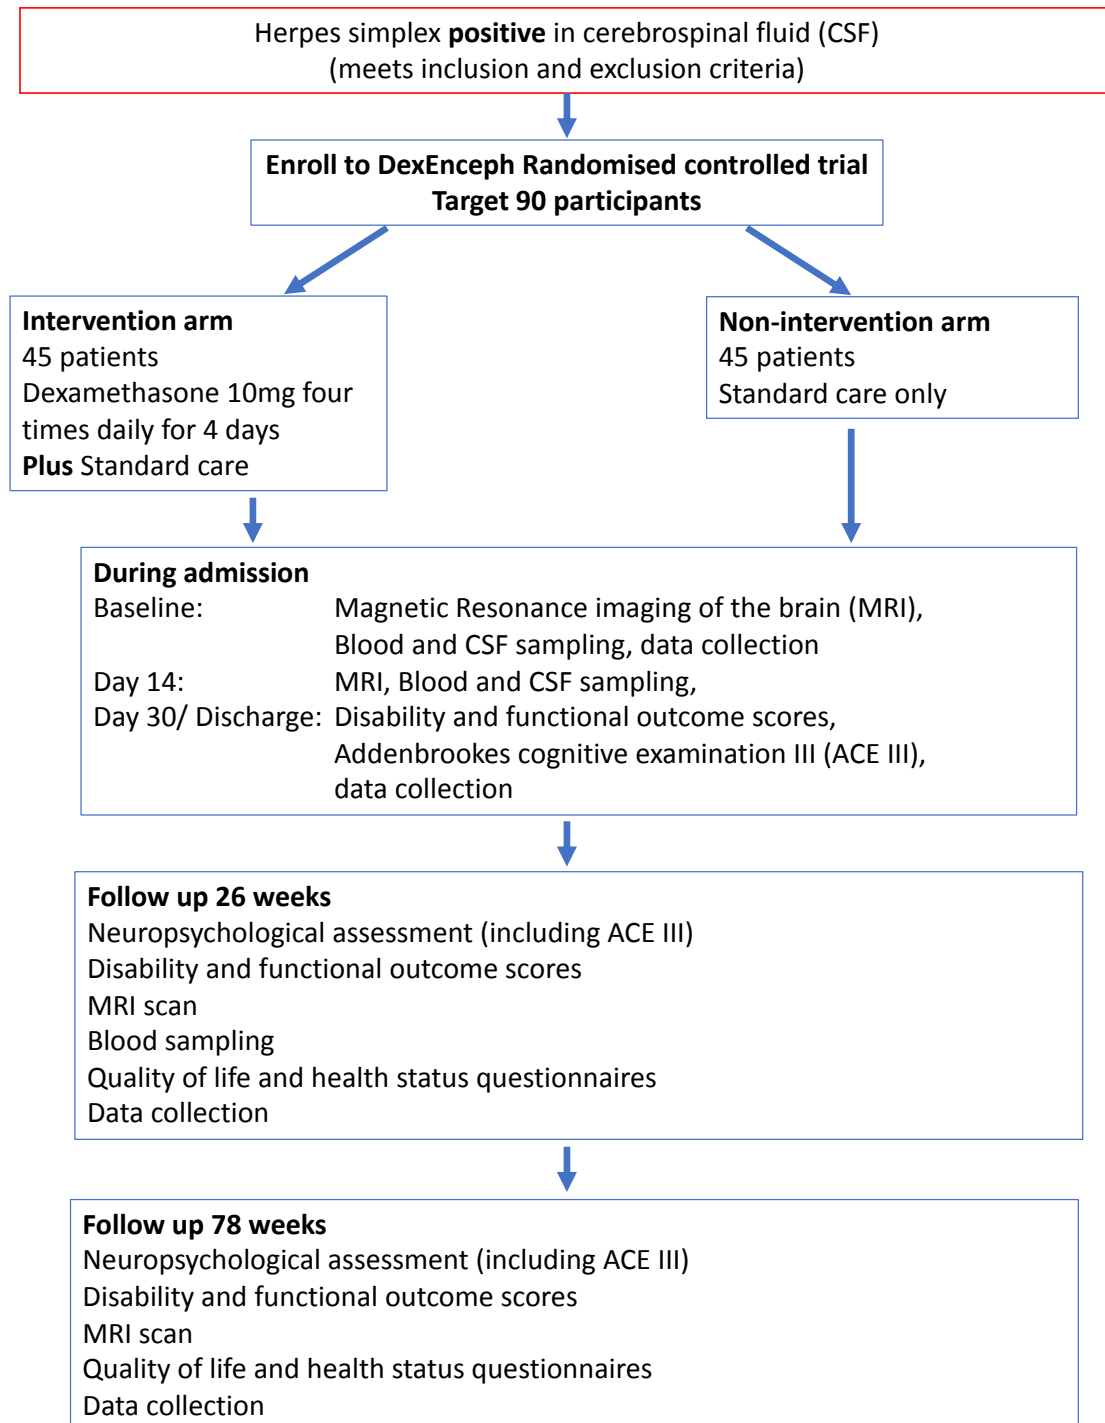

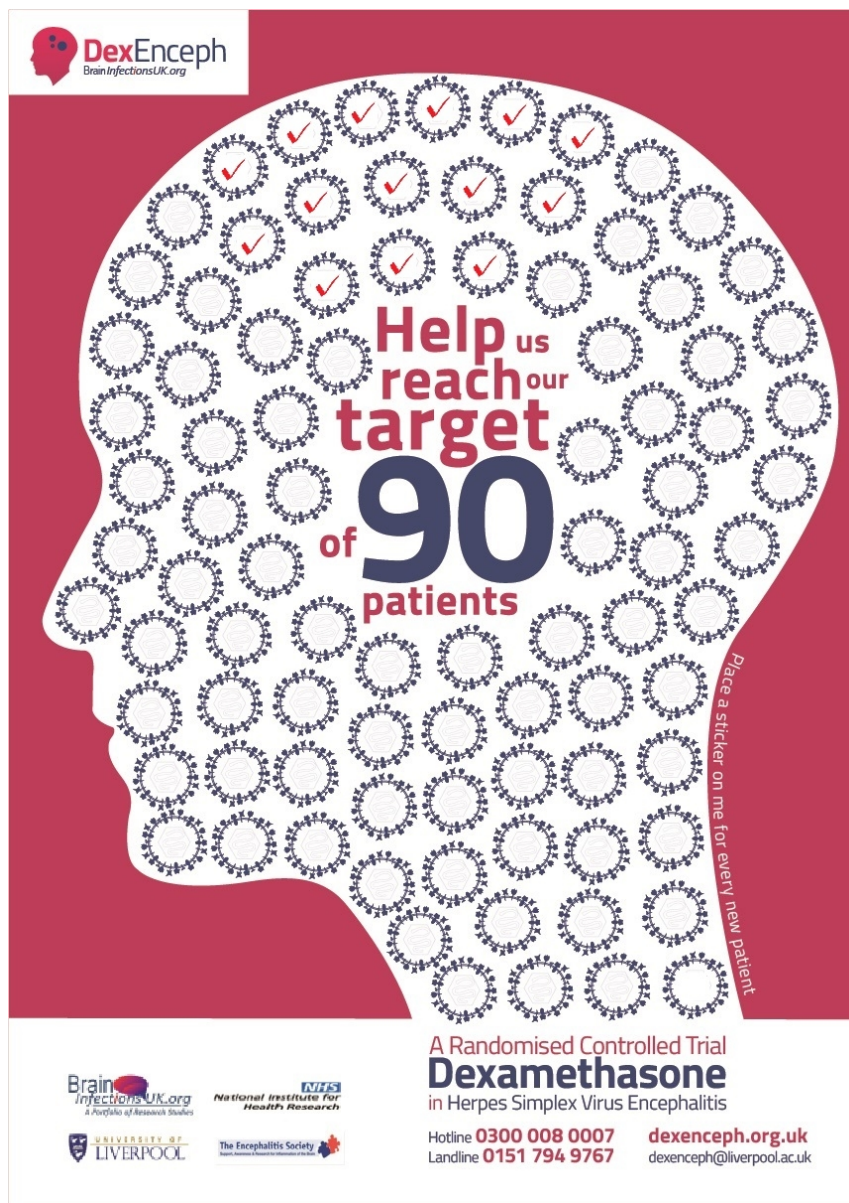

Figure 2: DexEnceph Trial recruitment poster

303x426mm (72 x 72 DPI)

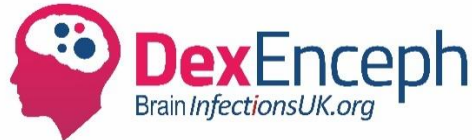

## RCT Adult with Capacity Information Sheet

Version 5.0, 25 May 2018

DexEnceph: A study of dexamethasone in adults with Herpes Simplex Virus (HSV) encephalitis  
Brain Infections Group, University of Liverpool

We understand this is a difficult and stressful time for you, so we firstly want to thank you for taking the time to read this leaflet.

You are being invited to take part in a research study on HSV encephalitis. This condition is extremely rare and is probably something you had never heard about before. This is why a team member will go through this leaflet with you, explaining what taking part in the study would involve and answering any questions.

### Important things you need to know

- This is a study for patients with encephalitis (swelling of the brain) caused by a virus called herpes simplex virus (HSV).
- Encephalitis can make you confused, drowsy, behave out of character, affect your sleep and memory, change your mood or may cause you to have fits.
- We want to find out if reducing the swelling with a drug called dexamethasone is of benefit to patient's memory in the longer term.
- In the study there will be two groups of patients, one that receives dexamethasone and one that does not.
- If you are in the group that receives dexamethasone this will be for 4 days in hospital.
- Both groups will have the same investigations to see if dexamethasone has been of benefit.
- Dexamethasone is a commonly used drug in brain swelling and many other conditions. Like all medicines, dexamethasone has side-effects. We will explain what these can be later.

### We would like to invite you to take part in a research study

- Before you decide to take part it is important you know why the research is being done and what it will involve.
- You can discuss with family, friends and clinical staff before making a decision.
- You are free to decide whether you would like to take part.
- If you choose to take part and then decide you no longer want to be involved you can stop taking part without giving a reason. Your care will not be affected.
- Please let us know if there is anything in this leaflet that is not clear or if you would like more information. A member of our team will answer your questions.
- If you decide to take part we will offer you a copy of this form and ask you to sign a consent form.

## HSV encephalitis

### 1. What is HSV encephalitis?

Encephalitis means swelling of the brain and has many different causes. It is often caused by a virus. Herpes Simplex Virus (HSV) is the most common virus that causes encephalitis in the UK.

HSV encephalitis is very rare. It is diagnosed by finding the virus in fluid around the brain and spinal cord. This fluid is called CSF (cerebrospinal fluid). The CSF is obtained by the doctor who performs a lumbar puncture (LP).

HSV encephalitis is treated with the drug aciclovir. Despite treatment, some people are left with significant loss of memory. About 2 out of every 3 people will have memory difficulties long term.

## The study

### 2. Why are we doing this study?

We know dexamethasone can reduce swelling. Reduction in swelling of the brain may improve the recovery of patients with HSV encephalitis.

This study, called DexEnceph, will allow us to compare the recovery of patients that received dexamethasone and those that did not.

### 3. Why have I been invited to take part?

There are two reasons why you may have been invited to take part:

**A.** Your doctors have diagnosed you with having HSV encephalitis.

**OR**

**B.** You may have been invited to take part before the diagnosis is made. This is because your doctors think there is a chance you may have HSV encephalitis. This will mean you have more time to think about taking part.

### 4. What will happen to me during the study?

All patients in the study will receive aciclovir. This is standard treatment for HSV encephalitis.

In addition, if you decide to take part in the study, you may be offered a short course of dexamethasone. This will be decided at random by a computer. This is to be fair, so neither you, your doctor, nor the research team, can choose whether you receive dexamethasone or not. Half of the people in the study will receive dexamethasone and half will not.

If you receive dexamethasone this will be 4 times a day for 4 days. It is given in a line you already have for clinical care.

## What taking part involves

### 5. What tests are done if I take part?

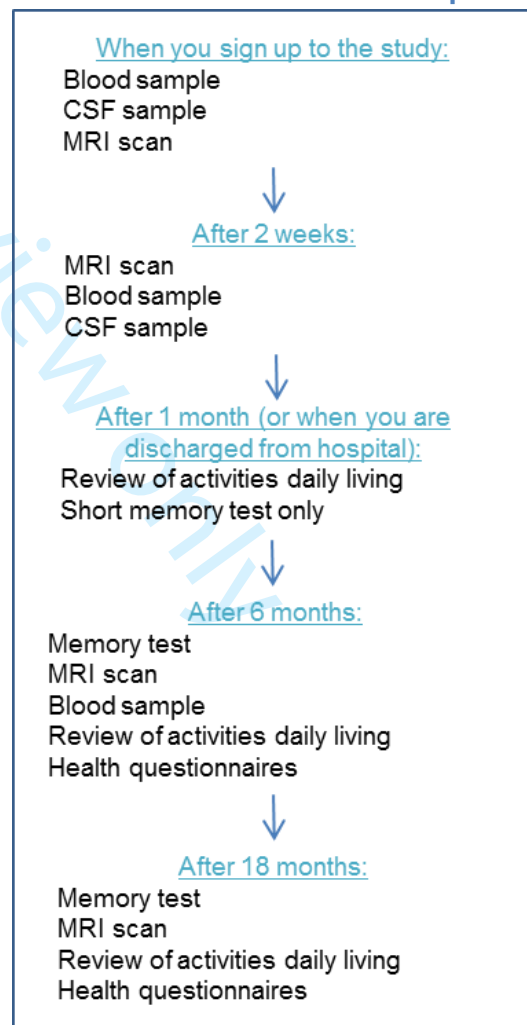

All the tests done when you sign up to the study and the CSF tests after 2 weeks will

be done as part of your care whether you take part in the study or not.

## 6. What do the memory tests involve?

These tests are the most important in the study as they will help us find out if dexamethasone improves memory problems from HSV encephalitis. These tests are sometimes called Neuropsychology tests. They are completed 6 and 18 months after the illness.

The key part of this test takes about 35 minutes. If you are not too tired we can continue with further tests that will provide useful information. These can take up to 2 hours.

They are not pass or fail tests. They provide information about your memory and thinking processes.

They can be done in one day or divided over a few short visits. If you have left hospital we can travel to see you in a convenient place for you. The test will be arranged on a day(s) which suits you.

The results can be added to your hospital notes for future reference if you wish or kept confidential within the trial.

## 7. What does the MRI scan involve?

As part of your care your doctor will organise an MRI scan when you are in hospital. If you take part in the study we will ask you to have another 3 scans later on.

MRI scans allow us to assess if the brain has been affected by the infection and, if so, which parts.

Each scan takes about 20 minutes. The scan can be noisy but you will be offered headphones.

The extra 3 scans are planned for:

- 2 weeks after the first one (when you are still in hospital)
- After 6 months
- After 18 months

The scans will be done at a hospital near you. We will reimburse mileage or public transport costs for any research visits.

We will check with you that you are still happy to have the scan each time. Sometimes scans may find something not related to this illness. If this happens the doctors looking at the scans will tell your own hospital doctors who will look into this further.

None of the research scans are compulsory so if you do not wish to have them you can still be part of the study.

## 8. Are there risks to having an MRI scan?

There are no known risks from an MRI scan. They do not use radiation. MRI scans are done routinely in patients with HSV encephalitis.

Because MRI scans use strong magnets you will not have the scan if you have any metal implants or fragments in your body.

Where you lie is quite enclosed and some people may find this unsettling. If you have a fear of confined spaces you should discuss this with your doctor before you go for the scan.

If you think you may be pregnant let your local research team know. We will not ask pregnant women to have MRI scans due to possible risks to the foetus.

## 9. What samples are collected? What does this involve?

We will collect blood and CSF samples during the study.

All patients with HSV encephalitis need a lumbar puncture (LP) when they come to hospital to find out why they are unwell. The doctor uses a small needle to take a sample from the lower part of the back. This is repeated after 2 weeks of treatment to see if all the virus has gone. Both lumbar punctures are part of the standard care in all patients with this condition.

We will take a little extra fluid at this time for the research tests. The amount of fluid we ask for each time is about 1 teaspoon, 5.5mls.

If you have already had a lumbar puncture before being told about the study, we will take stored CSF that is leftover for research tests.

Blood tests are requested at 3 different times spread over 6 months. We take between 1 to 4 teaspoons of blood, this is 5 to 23mls.

With these blood and CSF tests we will be able to better understand how the infection affects your body and how the body tries to defend itself against it.

#### 10. What will happen to the samples that are collected? Will any genetic tests be done?

All samples will be taken at your hospital and then transported to the University of Liverpool or other laboratories supporting the study. The samples will not have any of your personal information written on them. In the University they will be stored in a secure building.

There is an option for the blood and CSF collected to have tests looking at DNA. DNA is found in all cells of the body and contains the genetic information for the working of all human beings. This study collects DNA samples to find out why some people get HSV encephalitis and others do not, and why some people have severe problems due to HSV and others do not. The information we learn from DNA may benefit others with this condition in the future but will not influence your treatment or your future health.

Some of your samples may be left over. We will ask you if they can be used for this and future studies run by the University of Liverpool.

#### 11. How do you review activities of daily living?

We will find out how the illness has affected your day-to-day life.

The research team will look at your hospital notes. They may also talk to you and, if you choose, your relatives. This will happen when you are in hospital and when you have gone home.

We will compare patients who received dexamethasone to those that did not and see if it made a difference.

#### 12. What are the health questionnaires?

Two questionnaires will be sent through the post. They will ask you your views about your health and quality of life. Please send them back in a pre-paid envelope.

#### Dexamethasone

#### 13. What are the side effects of dexamethasone?

Dexamethasone is used widely in patients and the side-effects are well known as this medicine has been prescribed for a long time. A short course of dexamethasone will be prescribed in this study. Side effects are less common when dexamethasone is given for shorter periods.

It is important you know about the possible side-effects before you decide to take part. These are:

- Stomach pain, indigestion, having more appetite than usual, feeling or being sick.
- Feeling tired or fatigued
- Mood and behaviour changes, especially at the beginning.
- Higher blood sugars.

Other possible risks can include:

- Stomach ulcers and bleeding of ulcers.
- Decreased response to infections.

You will be in hospital when you take dexamethasone so you can tell your doctors immediately if you have any problem.

If you suffer side effects you or your doctor can decide to stop the dexamethasone at any point.

Dexamethasone is prescribed to women who are pregnant or breast feeding as there are no known risks to the foetus.

### Other things to consider

#### 14. Do I have to take part?

No, taking part is voluntary. If you agree, we will ask you to sign a consent form.

If you agree to take part you are free to change your mind at any time, without giving a reason. You may decide to have only some tests in the study without having to drop out of the study altogether. This will not affect the standard of care you receive.

If you withdraw from the study we will stop collecting data. We will ask you if we can use the information and samples we have gathered up to the point that you withdraw.

#### 15. What happens if there is a problem?

If you have any concerns about any part of this study, please speak with your hospital doctor (consultant) or one of your research team.

If you remain unhappy and wish to complain formally you can do this using the NHS Complaints Procedure. You can get information on how to do this from the Patients Advice Liaison department (PALS) in your hospital.

If you suffer harm from taking part in this study, there are no special compensation arrangements. If harm occurs to you and it is due to someone's negligence, you may have grounds for legal action for compensation against the NHS hospital where you are being treated but you may have to pay your legal costs.

#### 16. Who will know I have taken part in this study?

Only people in your clinical care team and people involved in the study will have access to personal data. With your consent we will tell your GP that you are taking part.

All information collected about you during this study will be confidential and anonymised. It will be handled, stored and destroyed in accordance with the General Data Protection Regulation.

University of Liverpool is the sponsor for this study based in the United Kingdom. We will be using information from you and your medical records in order to undertake this study and will act as the data controller for this study. This means that we are responsible for looking after your information and using it properly. University of Liverpool will keep identifiable information about you for 15 years after the study has finished.

Your rights to access, change or move your information are limited, as we need to manage your information in specific ways in order for the research to be reliable and accurate. If you withdraw from the study, we will keep the information about you that we have already obtained. To safeguard your rights, we will use the minimum personally-identifiable information possible.

You can find out more about how we use your information <http://www.dexenceph.org.uk/>. Our Data Protection Officer is Victoria Heath and you can contact them at [V.Heath@liverpool.ac.uk](mailto:V.Heath@liverpool.ac.uk).

### Benefits and risks

#### 17. What are the benefits of taking part?

You may benefit from receiving dexamethasone, however we will not know this until the end of the study. You

may also benefit from the increased monitoring of having extra scans and memory tests.

The information we get from this study may benefit patients in the future.

**18. What are the possible disadvantages and risks of taking part?**

The disadvantage in taking part in this study may be the risk of having the side-effects of dexamethasone listed in question 13 (this will not be the case if you are in the group that does not have dexamethasone).

There is the inconvenience of having the dexamethasone through the drip when you are in hospital. Once you leave hospital there is the inconvenience of travelling to hospital for 2 scans, having the memory tests and completing questionnaires.

**Contact details**

If you have any questions about this study, then please contact the study team members:

Principal Investigator (Doctor leading this study in your hospital):

Name: \_\_\_\_\_

\_\_\_\_\_

Telephone: \_\_\_\_\_

Research Nurse:

Name: \_\_\_\_\_

\_\_\_\_\_

Telephone: \_\_\_\_\_

Name of your Hospital: \_\_\_\_\_

**Further information**

This study is being run at your hospital and many other NHS hospitals throughout the UK. It aims to recruit 90 patients over 4 years.

It is organised by the University of Liverpool and is funded by the National Institute for Health Research (NIHR), the public body in charge of research in the UK.

Our study team includes The Encephalitis Society, a charity that supports patients and families ([www.encephalitis.info](http://www.encephalitis.info)).

The study has been reviewed for scientific content by expert members of NIHR. The National Research Ethics Service Committee Liverpool Central has reviewed the study and given approval for it to take place.



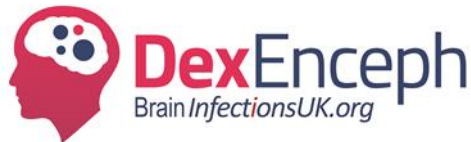

### RCT Adult with Capacity Consent Form

Version 5.0, Dated: 25/May/2018

EudraCT Number: 2015-001609-16

Centre Name:

Centre Code:

Name of Principal Investigator:

Study Number:

Please complete this form. When completed give one copy to the participant to keep, send one copy to CTU [fax/encrypted email/post], and keep one in the participant's medical notes. Please put the original in the site file.

**For patient: once you have understood each statement please initial the YES OR NO box**

**YES****NO**

|                                                                                                                                                                                                                                                                                                                                             |                   |                  |
|---------------------------------------------------------------------------------------------------------------------------------------------------------------------------------------------------------------------------------------------------------------------------------------------------------------------------------------------|-------------------|------------------|
| 1. I confirm I have read and understand the Information Leaflet (dated DD/MMM/YYYY) for the above study, and have had the opportunity to ask questions and have these answered satisfactorily.                                                                                                                                              | INITIAL<br>IF YES | INITIAL<br>IF NO |
| 2. I agree to take part in this study.                                                                                                                                                                                                                                                                                                      | INITIAL<br>IF YES | INITIAL<br>IF NO |
| 3. I understand that my participation is voluntary and that I am free to withdraw from the study at any time without giving a reason and without my care or legal rights being affected.                                                                                                                                                    | INITIAL<br>IF YES | INITIAL<br>IF NO |
| 4. I agree for my consent form and contact details to be passed to the University of Liverpool for the administration of the study.                                                                                                                                                                                                         | INITIAL<br>IF YES | INITIAL<br>IF NO |
| 5. I understand that relevant sections of my medical notes and any data collected during the study may be looked at by authorised individuals from the research and clinical team and Regulatory Authorities where it is relevant to my taking part in this research. I give permission for these individuals to have access to my records. | INITIAL<br>IF YES | INITIAL<br>IF NO |
| 6. I agree for genetic tests to be done on blood and CSF collected. I understand these genetic tests will not be of any individual significance to me.                                                                                                                                                                                      | INITIAL<br>IF YES | INITIAL<br>IF NO |

7. I agree to have MRI scans as part of the trial.

INITIAL  
IF YES

INITIAL  
IF NO

8. I agree for my GP and hospital doctors to be informed if the scan picks up something unexpected.

INITIAL  
IF YES

INITIAL  
IF NO

9. I agree to gift the remainder of any blood or CSF sample to the University of Liverpool where it will be stored for use in future research. This may include genetic tests.

INITIAL  
IF YES

INITIAL  
IF NO

10. I agree to any images or scans that are taken to be used for teaching, education and publication (in scientific journals, books or internet).

INITIAL  
IF YES

INITIAL  
IF NO

11. I agree for my GP to be informed I am taking part in this study.

INITIAL  
IF YES

INITIAL  
IF NO

\_\_\_\_\_  
Name of Participant  
(Please print)

\_\_\_\_\_  
Signature

\_\_\_\_\_  
Date (DD/MM/YYYY)

\_\_\_\_\_  
Researcher\*

\_\_\_\_\_  
Signature

\_\_\_\_\_  
Date (DD/MM/YYYY)

\* **Important:** Prior to signing please ensure local research contact details are complete on page 6.

Information to Research Team:

Once a Consent Form has been signed, please copy three times: One for the participant, one to file in the medical notes and fax/post/encrypted email one to CTU. Please place original in the site file.

Please fax/encrypt email/post this consent form to CTU **separately** to other anonymised trial documents (e.g. CRF).

# BMJ Open

## Protocol for DexEnceph; a randomised controlled trial of dexamethasone therapy in adults with Herpes Simplex Virus Encephalitis

|                                 |                                                                                                                                                                                                                                                                                                                                                                                                                                                                                                                                                                                                                                                                                                                                                                                                                                                                                                                                                                                                                                                                                                                                                                                                                                                                                                                                                                                                                                                                                                                                                                                                                                                                                                                                                                                                                                                                                                                                                                                                                                                                           |
|---------------------------------|---------------------------------------------------------------------------------------------------------------------------------------------------------------------------------------------------------------------------------------------------------------------------------------------------------------------------------------------------------------------------------------------------------------------------------------------------------------------------------------------------------------------------------------------------------------------------------------------------------------------------------------------------------------------------------------------------------------------------------------------------------------------------------------------------------------------------------------------------------------------------------------------------------------------------------------------------------------------------------------------------------------------------------------------------------------------------------------------------------------------------------------------------------------------------------------------------------------------------------------------------------------------------------------------------------------------------------------------------------------------------------------------------------------------------------------------------------------------------------------------------------------------------------------------------------------------------------------------------------------------------------------------------------------------------------------------------------------------------------------------------------------------------------------------------------------------------------------------------------------------------------------------------------------------------------------------------------------------------------------------------------------------------------------------------------------------------|
| Journal:                        | <i>BMJ Open</i>                                                                                                                                                                                                                                                                                                                                                                                                                                                                                                                                                                                                                                                                                                                                                                                                                                                                                                                                                                                                                                                                                                                                                                                                                                                                                                                                                                                                                                                                                                                                                                                                                                                                                                                                                                                                                                                                                                                                                                                                                                                           |
| Manuscript ID                   | bmjopen-2020-041808.R1                                                                                                                                                                                                                                                                                                                                                                                                                                                                                                                                                                                                                                                                                                                                                                                                                                                                                                                                                                                                                                                                                                                                                                                                                                                                                                                                                                                                                                                                                                                                                                                                                                                                                                                                                                                                                                                                                                                                                                                                                                                    |
| Article Type:                   | Protocol                                                                                                                                                                                                                                                                                                                                                                                                                                                                                                                                                                                                                                                                                                                                                                                                                                                                                                                                                                                                                                                                                                                                                                                                                                                                                                                                                                                                                                                                                                                                                                                                                                                                                                                                                                                                                                                                                                                                                                                                                                                                  |
| Date Submitted by the Author:   | 01-Nov-2020                                                                                                                                                                                                                                                                                                                                                                                                                                                                                                                                                                                                                                                                                                                                                                                                                                                                                                                                                                                                                                                                                                                                                                                                                                                                                                                                                                                                                                                                                                                                                                                                                                                                                                                                                                                                                                                                                                                                                                                                                                                               |
| Complete List of Authors:       | Whitfield, Thomas; University of Liverpool, Brain Infections Unit<br>Fernandez, Cristina; University of Liverpool, Brain Infections Unit<br>Davies, Kelly; University of Liverpool, Clinical Trials Research Centre<br>Defres, Sylviane; Institute of Infection and Global Health, Clinical infection, medical microbiology and Immunology; Royal Liverpool and Broadgreen University Hospitals Trust, Tropical infectious diseases Unit<br>Griffiths, Michael; University of Liverpool, Brain Infections Unit; Alder Hey Children's NHS Foundation Trust, Neurology<br>Hooper, Cory; University of Liverpool, Brain Infections Unit<br>Tangney, Rebecca; Aintree University Hospitals NHS Foundation Trust<br>Burnside, Girvan; University of Liverpool Faculty of Health and Life Sciences, Biostatistics<br>Rosala- Hallas, Anna; University of Liverpool Faculty of Health and Life Sciences, Biostatistics<br>Moore, Perry; The Walton Centre NHS Foundation Trust, Dept of Clinical Neuropsychology<br>Das, Kumar; The Walton Centre NHS Foundation Trust<br>Zuckerman, Mark; King's College Hospital NHS Foundation Trust, South London Specialist Virology Centre<br>Parkes, Laura; University of Manchester Institute of Science and Technology Department of Biomolecular Science,<br>Keller, Simon; Aintree University Hospitals NHS Foundation Trust<br>Roberts, Neil; The University of Edinburgh The Queen's Medical Research Institute<br>Easton, Ava; The Encephalitis Society<br>Touati, Saber; CHU Grenoble Alpes, Service des Maladies Infectieuses et Tropicales<br>Kneen, Rachel; Alder Hey Children's NHS Foundation Trust, Department of Neurology;; Institute of Infection and Global Health, Clinical Infection, medical microbiology and Immunology<br>Stahl, JP; Infectious Diseases Department, University of Grenoble<br>Solomon, Tom; University of Liverpool Institute of Infection and Global Health; National Institute for Health Research Health Protection Research Unit in Emerging and Zoonotic Infections, University of Liverpool |
| <b>Primary Subject Heading</b>: | Neurology                                                                                                                                                                                                                                                                                                                                                                                                                                                                                                                                                                                                                                                                                                                                                                                                                                                                                                                                                                                                                                                                                                                                                                                                                                                                                                                                                                                                                                                                                                                                                                                                                                                                                                                                                                                                                                                                                                                                                                                                                                                                 |
| Secondary Subject Heading:      | Infectious diseases, Pharmacology and therapeutics, Intensive care                                                                                                                                                                                                                                                                                                                                                                                                                                                                                                                                                                                                                                                                                                                                                                                                                                                                                                                                                                                                                                                                                                                                                                                                                                                                                                                                                                                                                                                                                                                                                                                                                                                                                                                                                                                                                                                                                                                                                                                                        |

1  
2  
3  
4  
5  
6  
7  
8  
9  
10  
11  
12  
13  
14  
15  
16  
17  
18  
19  
20  
21  
22  
23  
24  
25  
26  
27  
28  
29  
30  
31  
32  
33  
34  
35  
36  
37  
38  
39  
40  
41  
42  
43  
44  
45  
46  
47  
48  
49  
50  
51  
52  
53  
54  
55  
56  
57  
58  
59  
60

|           |                                                                                        |
|-----------|----------------------------------------------------------------------------------------|
| Keywords: | Neurology < INTERNAL MEDICINE, VIROLOGY, NEUROLOGY,<br>Neurological injury < NEUROLOGY |
|           |                                                                                        |

SCHOLARONE™  
Manuscripts



I, the Submitting Author has the right to grant and does grant on behalf of all authors of the Work (as defined in the below author licence), an exclusive licence and/or a non-exclusive licence for contributions from authors who are: i) UK Crown employees; ii) where BMJ has agreed a CC-BY licence shall apply, and/or iii) in accordance with the terms applicable for US Federal Government officers or employees acting as part of their official duties; on a worldwide, perpetual, irrevocable, royalty-free basis to BMJ Publishing Group Ltd ("BMJ") its licensees and where the relevant Journal is co-owned by BMJ to the co-owners of the Journal, to publish the Work in this journal and any other BMJ products and to exploit all rights, as set out in our [licence](#).

The Submitting Author accepts and understands that any supply made under these terms is made by BMJ to the Submitting Author unless you are acting as an employee on behalf of your employer or a postgraduate student of an affiliated institution which is paying any applicable article publishing charge ("APC") for Open Access articles. Where the Submitting Author wishes to make the Work available on an Open Access basis (and intends to pay the relevant APC), the terms of reuse of such Open Access shall be governed by a Creative Commons licence – details of these licences and which [Creative Commons](#) licence will apply to this Work are set out in our licence referred to above.

Other than as permitted in any relevant BMJ Author's Self Archiving Policies, I confirm this Work has not been accepted for publication elsewhere, is not being considered for publication elsewhere and does not duplicate material already published. I confirm all authors consent to publication of this Work and authorise the granting of this licence.

1  
2  
3  
4  
5  
6  
7  
8  
9  
10  
11  
12  
13  
14  
15  
16  
17  
18  
19  
20  
21  
22  
23  
24  
25  
26  
27  
28  
29  
30  
31  
32  
33  
34  
35  
36  
37  
38  
39  
40  
41  
42  
43  
44  
45  
46  
47  
48  
49  
50  
51  
52  
53  
54  
55  
56  
57  
58  
59  
60

1 **Protocol for DexEnceph; a randomised controlled trial of dexamethasone therapy in adults**  
2 **with Herpes Simplex Virus Encephalitis**

3 The study is funded by the National Institute for Health Research's Efficacy and Mechanism  
4 Evaluation (EME) programme.

5  
6 The trial sponsor is the University of Liverpool, who are responsible for all aspects of study  
7 design, implementation, analysis and write up (sponsor@liverpool.ac.uk).

8  
For peer review only

## 9 **Abstract**

### 10 **Introduction**

11 Herpes simplex virus (HSV) encephalitis is a severe form of brain inflammation that  
12 commonly leaves survivors and their families with devastating long-term consequences. The  
13 virus particularly targets the temporal lobe of the brain causing debilitating memory  
14 problems, especially in verbal memory. It is postulated that immunomodulation with  
15 steroids could improve outcomes by reducing brain swelling. However, there are concerns  
16 (so far not observed) that such immunosuppression might facilitate increased viral  
17 replication with resultant worsening of disease. A previous trial closed early because of slow  
18 recruitment.

### 19 **Method**

20 DexEnceph is a pragmatic multicentre, randomised, controlled, open label, observer-blind  
21 trial to determine whether adults who receive dexamethasone alongside standard  
22 treatment with aciclovir for HSV encephalitis have improved clinical outcomes compared  
23 with those who receive standard treatment alone. Overall, 90 patients with HSV  
24 encephalitis will be recruited from a target of 90 recruiting sites; patients will be  
25 randomised 1:1 to the dexamethasone or control arms of the study. The primary outcome  
26 measured is verbal memory as assessed by the Weschler Memory Scale fourth edition  
27 Auditory Memory Index at 26 weeks post randomisation. Secondary outcomes are  
28 measured up to 72 weeks include additional neuropsychological, clinical and functional  
29 outcomes as well as comparison of neuroimaging findings. Patient safety monitoring occurs  
30 throughout and includes the detection of HSV DNA in cerebrospinal fluid 2 weeks after  
31 randomisation, which is indicative of ongoing viral replication.

1  
2  
3 32 **Discussion**  
4  
5

6 33  
7  
8  
9 34 DexEnceph aims to be the first completed randomised controlled trial of steroid therapy in  
10  
11 35 HSV encephalitis. The results will provide evidence for future practice in managing adults with  
12  
13  
14 36 the condition and has the potential to improve outcomes in a life-changing disease.  
15

16  
17 37

18  
19 38 **Ethics and dissemination**  
20

21 39 The trial has ethical approval from the UK National Research Ethics committee (Liverpool  
22  
23  
24 40 Central, REF: 15/NW/0545, 10/08/2015). Protocol version 2.1 July 2019 The results will be  
25  
26 41 published and presented as soon as possible on completion.  
27  
28

29 42

30  
31 43 **Registration numbers**  
32

33  
34 44 ISRCTN11774734, EUDRACT 2015-001609-16  
35  
36

37 46  
38

39  
40 47 Key words: Herpes simplex, Encephalitis, Dexamethasone, Steroid, Verbal memory  
41

42 48  
43  
44  
45  
46  
47  
48  
49  
50  
51  
52  
53  
54  
55  
56  
57  
58  
59  
60



1  
2  
3 49 **Article Summary**  
4

5 50 **'Strengths and limitations of this study'**, and containing up to five short bullet points, no  
6 51 longer than one sentence each, that relate specifically to the methods.  
7  
8 52

- 9  
10 53     ▪ DexEnceph will be the first completed randomised controlled trial of steroid in herpes  
11 54     simplex virus encephalitis, examining the utility and safety of steroid use.  
12  
13 55  
14  
15 56     ▪ DexEnceph's primary end point is verbal memory score recorded at 26 weeks post  
16 57     randomisation, this represents the most common area of the brain to be affected.  
17  
18 58  
19 59  
20 60     ▪ The recruitment target is informed by the recent Enceph-UK programme grant of  
21 61     encephalitis in the UK; the trial is currently open and has recruited 71 patients of a  
22 62     target 90.  
23  
24  
25 63  
26  
27 64     ▪ Concentration on site engagement with innovative, bespoke methods are key to  
28 65     identifying and recruiting patients to ensure trial success.  
29  
30 66  
31  
32 67     ▪ The pragmatic open label, observer blind design of the trial is ensuring successful  
33 68     recruitment to date.  
34  
35 69

36  
37  
38 70 Authors: Whitfield T,<sup>1</sup> Fernandez C,<sup>1</sup> Davies K,<sup>2</sup> Defres S<sup>1, 13, 15</sup>, Griffiths M,<sup>1, 14</sup> Hooper C,<sup>1</sup>  
39  
40 71 Tangney R,<sup>3</sup> Burnside G,<sup>4</sup> Rosala-Hallas A,<sup>4</sup> Moore P,<sup>12</sup> Das K,<sup>5</sup> Zuckerman M,<sup>6</sup> Parkes L,<sup>7</sup>,  
41  
42 72 Keller S,<sup>3</sup> Roberts N,<sup>8</sup> Easton A,<sup>1,9</sup> Touati S,<sup>10</sup> Kneen R,<sup>1,14</sup> JP Stahl<sup>11</sup> & Solomon T<sup>1, 5,15</sup>  
43  
44  
45  
46 73

- 47  
48  
49 74     1. Institute of Infection and Global Health, University of Liverpool, L69 7BE, United  
50  
51     Kingdom  
52 75  
53  
54 76     2. Clinical Trials Research Centre, University of Liverpool, L12 2AP, United Kingdom  
55  
56 77     3. University Hospital Aintree, L9 7AL, United Kingdom  
57  
58 78     4. Department of Biostatistics, University of Liverpool, L69 3GL, United Kingdom  
59  
60

- 1  
2  
3 79 5. The Walton Centre NHS Foundation Trust, L9 7JL, United Kingdom  
4  
5  
6 80 6. South London Specialist Virology Centre, Kings College Hospital NHS Foundation Trust,  
7  
8 81 SE5 9RS, United Kingdom  
9  
10 82 7. Division of Neuroscience and Experimental Psychology, Faculty of Biology Medicine  
11  
12 and Health, University of Manchester, M13 9NT, United Kingdom  
13 83  
14  
15 84 8. Queens Medical Research Institute, University of Edinburgh, EH16 4TJ, United  
16  
17 Kingdom  
18 85  
19  
20 86 9. Encephalitis Society, Malton, North Yorkshire, YO17 7DT, United Kingdom  
21  
22  
23 87 10. Département de Recherche Clinique (DRC), Grenoble Cedex, France  
24  
25 88 11. Infectious Diseases Department, University and Hospital Grenoble Alpes, Grenoble  
26  
27 Cedex, France  
28 89  
29  
30 90 12. Salford Royal NHS Foundation Trust, M6 8HD, United Kingdom  
31  
32 91 13. Tropical Infectious diseases Unit, Royal Liverpool University Hospital, L7 8XP, United Kingdom  
33  
34  
35 92 14. Alder Hey NHS Foundation Trust, Liverpool, L14 5AB, United Kingdom  
36  
37 93 15. NIHR Health Protection Research Unit on Emerging and Zoonotic Infections, Liverpool, L69  
38  
39 94 7BE, United Kingdom  
40  
41  
42 95 Correspondence & trial sponsor: Tom Solomon [tsolomon@liverpool.ac.uk](mailto:tsolomon@liverpool.ac.uk)  
43  
44  
45 96 HPRU Project Team, The Ronald Ross Building, University of Liverpool, 8 West Derby  
46  
47 Street, Liverpool, L69 7BE  
48 97  
49  
50  
51 98 Tel: 0151 795 7552  
52  
53  
54 99 Fax: 0151 795 5527  
55  
56  
57  
58 100  
59  
60

1  
2  
3 101 Word Count : 4900 words  
4  
5

6 102  
7  
8

9 103  
10  
11

12 104  
13  
14

15 105  
16  
17

18  
19 106 **Introduction**  
20  
21

22 107 Herpes simplex virus infection (HSV) is the most commonly identified viral cause of  
23  
24 108 encephalitis, inflammation and swelling of the brain caused by a virus or the body's immune  
25  
26 109 system, in the UK as in most western industrialised nations.<sup>1-4</sup> The incidence has been  
27  
28 110 estimated at 1 in 250,000-500,000,<sup>2</sup> with evidence this may be higher.<sup>4</sup> Although a rare  
29  
30 111 disease, HSV encephalitis has a disproportionately large impact due to its devastating long  
31  
32 112 term neuro-psychological sequelae . These can have a marked impact on the quality of life of  
33  
34 113 the patient and their family and high health economic and social costs.<sup>5,6</sup>  
35  
36  
37  
38  
39

40 114 Since the introduction of the antiviral drug aciclovir in the 1970s the mortality of HSV  
41  
42 115 encephalitis has reduced from around 70% to 5.5-12%.<sup>7-9</sup> However, survivors are commonly  
43  
44 116 left with neurological impairment; less than 20% of patients are able to return to work and  
45  
46 117 48% are classed as moderate to severely disabled.<sup>10</sup> Even when obvious disabilities have not  
47  
48 118 occurred, families often report personality changes – the person they take home from  
49  
50 119 hospital is simply not the same as the one before the illness. <sup>6,11</sup>  
51  
52  
53  
54

55 120 HSV encephalitis can cause a broad range of cognitive impairments, but impaired memory,  
56  
57 121 especially verbal memory, is the most common and likely relates to the viral predilection for  
58  
59  
60

1  
2  
3 122 the temporal lobe of the brain.<sup>12,13</sup> The verbal memory deficits manifest as difficulties  
4  
5 123 remembering names of objects and people, as well as listening to and recalling spoken  
6  
7  
8 124 information such as conversations.<sup>14,15</sup> In addition to memory problems, difficulties in  
9  
10 125 processing speed, concentration, language and executive function are also common amongst  
11  
12  
13 126 survivors of HSV encephalitis, along with fatigue, poor concentration, anxiety and depression.

14  
15 127 7,16,17  
16  
17  
18

19 128 The pathogenic mechanisms in HSV encephalitis are not fully understood. The evidence  
20  
21 129 suggests that in addition to direct viral pathogenesis, inflammation of the brain in response  
22  
23  
24 130 to the virus is a key component of the disease process.<sup>18–21</sup> This is supported by the  
25  
26 131 observation that in the cerebrospinal fluid (CSF), higher levels of proinflammatory  
27  
28  
29 132 chemokines, especially monocyte chemoattractant protein (MCP)-1, interferon  $\gamma$  and interleukin  
30  
31 133 6 (IL-6) are associated with a worse prognosis.<sup>22,23</sup> Poor prognosis is also associated with the  
32  
33  
34 134 extent of inflammation seen on neuroimaging,<sup>24</sup> and the degree of temporal lobe swelling is  
35  
36 135 correlated with the severity of verbal memory impairment.<sup>25</sup>  
37  
38  
39

40 136 Control of the inflammation in HSV encephalitis may improve outcome, as shown in mouse  
41  
42 137 models of the disease.<sup>26–28</sup> Before the availability of aciclovir, corticosteroids were also used  
43  
44  
45 138 routinely as a treatment in humans with HSV encephalitis,<sup>29,30</sup> and more recently both  
46  
47 139 cerebral oedema on imaging and cerebrospinal fluid IL-6 levels were shown to be reduced in  
48  
49  
50 140 patients given corticosteroids.<sup>23</sup> However, because corticosteroids cause  
51  
52 141 immunosuppression which in theory facilitates increased viral replication, their role is  
53  
54 142 uncertain.<sup>31</sup>  
55  
56

57 143 In other brain infections, including bacterial meningitis and tuberculous meningitis the benefit  
58  
59  
60 144 of corticosteroids has been demonstrated in large clinical trials.<sup>32</sup> For HSV encephalitis the

1  
2  
3 145 potential benefit of using corticosteroid as an adjunct to aciclovir therapy has been suggested  
4  
5  
6 146 from small case series and retrospective comparisons, but there has been no prospective  
7  
8 147 randomised study reported.<sup>33–38</sup> One study, the German trial of Aciclovir and Corticosteroids  
9  
10 148 in Herpes simplex virus Encephalitis (the GACHE trial) was stopped early because of poor  
11  
12  
13 149 recruitment rates.<sup>39</sup> However, there is clearly a need for a study to assess this question. The  
14  
15 150 DexEnceph Study, a randomised controlled trial of dexamethasone in HSV encephalitis, aims  
16  
17  
18 151 to achieve this.

19  
20  
21 152

### 22 23 24 153 **Trial design**

25  
26  
27 154 DexEnceph is a pragmatic, multicentre, randomised, controlled, observer-blind trial to  
28  
29  
30 155 determine whether the addition of dexamethasone to standard aciclovir treatment improves  
31  
32 156 clinical outcomes (in particular verbal memory score) for adults with HSV encephalitis.  
33  
34 157 Additionally, neuroimaging and biomarkers will be assessed along with detection of HSV in  
35  
36  
37 158 the cerebrospinal fluid at 2 weeks post randomisation to monitor for difference in viral  
38  
39 159 replication between the two groups.

40  
41  
42 160

### 43 44 45 161 **Primary objective**

46  
47  
48 162 To determine whether a short course of intravenous dexamethasone, in addition to standard  
49  
50  
51 163 care, improves verbal memory score in adults with HSV encephalitis at 26 weeks post  
52  
53 164 treatment compared to standard care alone.

54  
55  
56 165

### 57 58 59 166 **Secondary objectives**

1  
2  
3 167 Secondary objectives include the following:  
4

5  
6 168 To determine whether dexamethasone therapy has an effect on other neuropsychological,  
7  
8  
9 169 cognitive, clinical, disability and functional outcomes in HSV encephalitis.

10  
11  
12 170 To assess the effect of dexamethasone therapy on brain swelling assessed by neuroimaging  
13  
14 171 imaging.

15  
16  
17 172 To determine whether dexamethasone therapy affects clearance of HSV from cerebrospinal  
18  
19  
20 173 fluid, the emergence of anti-N-Methyl-D Aspartic acid (NMDA) receptor antibody or causes  
21  
22 174 any changes in transcriptomic and proteomic profiling in the CSF and blood.  
23

24  
25 175

26  
27 176 A more comprehensive list of measures is detailed in the outcomes section.  
28

29  
30 177  
31

## 32 33 178 **Methods and analysis**

34  
35  
36 179 DexEnceph is an observer blind, open label, prospective, randomised, controlled trial of  
37  
38  
39 180 dexamethasone at 10mg four times daily for 4 days, versus no dexamethasone, in adults with  
40  
41 181 HSV encephalitis.  
42

## 43 44 182 **Research setting**

45  
46  
47 183 The trial is being conducted in up to 45 NHS trusts, with a recruitment target of 0-2 patients  
48  
49  
50 184 per site per year. A full list of sites involved in DexEnceph can be obtained from  
51  
52 185 [www.dexenceph.org.uk](http://www.dexenceph.org.uk)  
53

## 54 55 186 **Eligibility criteria**

## 56 57 58 187 **Inclusion Criteria** 59 60

1  
2  
3 188 Enrolled patients fulfil all of the following criteria:  
4

5  
6 189

7  
8 190 1. Suspected encephalitis defined as: new onset seizure or new focal neurological signs or  
9  
10 191 alteration in consciousness, cognition, personality, or behaviour. Personality / behaviour  
11  
12 192 change includes agitation, psychosis, somnolence, insomnia, catatonia, mood lability, altered  
13  
14 193 sleep pattern.  
15  
16

17  
18 194

19  
20 195 2. A positive HSV DNA polymerase chain reaction (PCR) result from CSF, reported not more  
21  
22 196 than 7 days prior to randomisation.  
23  
24

25 197

26  
27  
28 198 3. Receiving intravenous aciclovir administered as 10mg/kg three times daily or at a reduced  
29  
30 199 dose if clinically indicated.  
31  
32

33 200

34  
35 201 4. Age  $\geq$  16 years.  
36  
37

38 202

39  
40 203 5. Written informed consent given by the patient or their legal representative<sup>40</sup>  
41  
42

43 204  
44  
45

46 205 **Exclusion Criteria**  
47  
48

49 206 Patients are excluded if they have any of the following:  
50  
51

52 207 1. Have received oral or injectable corticosteroid therapy in the 30 days prior to the day of  
53  
54 208 admission to hospital. This does not apply to topical/ inhaled corticosteroids. [Patients who  
55  
56 209 have received oral or injectable corticosteroid therapy AFTER their admission to hospital will  
57  
58 210 not be excluded from the study if they consent to trial participation].  
59  
60

- 1  
2  
3 211  
4  
5  
6 212 2. History of hypersensitivity to corticosteroids.  
7  
8 213  
9  
10 214 3. Immunosuppression secondary to:  
11  
12  
13 215 a. Known HIV infection and CD4 white cell count under 200/mm<sup>3</sup>  
14  
15 216 b. Currently taking biologic therapy or other immunosuppressive agents [e.g.  
16  
17 azathioprine, methotrexate, ciclosporin]  
18 217  
19  
20 218 c. Previous solid organ transplant and currently on immunosuppression  
21  
22  
23 219 d. Previous bone marrow transplant  
24  
25 220 e. Currently undergoing a course of chemotherapy or radiotherapy  
26  
27  
28 221 f. Known primary immunodeficiency syndrome  
29  
30 222 g. Known current haematological malignancy  
31  
32  
33 223  
34  
35 224 4. Pre-existing indwelling ventricular devices.  
36  
37 225  
38  
39  
40 226 5. Peptic ulcer disease in the last 6 months, defined as a peptic ulcer seen at endoscopy or  
41  
42 227 an upper gastrointestinal bleed causing a  $\geq 2$  unit haemoglobin drop, in the last 6 months.  
43  
44  
45 228  
46  
47 229 6. Antiretroviral regime containing rilpivirine as current treatment [Levels of rilpivirine are  
48  
49 230 known to significantly decrease in co-administration with dexamethasone, a switch to a  
50  
51 suitable alternative can facilitate trial entry].  
52 231  
53  
54 232  
55  
56  
57 233 **Intervention**  
58  
59  
60



1  
2  
3 234 Participants are randomised in a 1:1 ratio to dexamethasone four times daily for four days  
4  
5  
6 235 alongside standard care, or standard care alone (Figure 1). Standard care includes intravenous  
7  
8 236 aciclovir for a minimum of 14 days based on an ideal body weight at 10mg/kg every 8 hours,  
9  
10 237 unless dose adjustment to account for renal impairment is necessary. Participating clinicians  
11  
12  
13 238 remain free to modify or discontinue the dexamethasone administration or to give alternative  
14  
15 239 treatments at any stage, if this is judged to be in the best interest of the patient.  
16

17  
18 240

19  
20 241 Participants assigned dexamethasone receive 10 mg equivalent of ordinary ward stock,  
21  
22 242 prescribed by an authorised member of the local study team, given intravenously four times  
23  
24 243 daily for four days (16 doses in total) starting within 24 hours of randomisation.  
25  
26

27  
28 244

29  
30 245 The University of Liverpool employs a clinical trials unit to be responsible for screening, and  
31  
32 246 monitoring data collection, quality and completeness. As there is a low number of  
33  
34 247 participants to be recruited, the trials unit are able to liaise regularly with each site following  
35  
36 248 randomisation to ensure all follow up data are collected. Primary outcome is recorded by a  
37  
38 249 centrally employed roving neuropsychologist, who collects the neuropsychological outcomes  
39  
40 250 at 26 and 72 weeks.  
41  
42

43  
44 251

45  
46 252

47  
48 253

49  
50 254

51  
52 255

53  
54 256

55  
56 257  
57  
58  
59  
60

1  
2  
3 258  
4  
5  
6 259  
7  
8 260  
9  
10  
11 261  
12  
13  
14 262 **Outcome measures**  
15  
16  
17 263 **Primary Outcome**  
18  
19  
20 264 Verbal memory score, determined by the Wechsler Memory Scale 4<sup>th</sup> edition (WMS-IV)  
21  
22 265 Auditory Memory Index, at 26 weeks after randomisation.  
23  
24  
25 266 **Secondary Outcomes**  
26  
27  
28 267 Other neuropsychological outcome measures [at 26 weeks and 78 weeks after  
29  
30  
31 268 randomisation]:  
32  
33  
34 269 • Verbal memory score, determined by the WMS-IV, Auditory Memory Index, at 78  
35  
36 270 weeks after randomisation.  
37  
38  
39 271 • Visual, Immediate and Delayed Memory by Indexes of the WMS-IV, processing speed  
40  
41 272 and working memory subscales from the Wechsler Adult Intelligence Scale Fourth  
42  
43 273 Edition.  
44  
45  
46 274 • Higher executive function using the Trail Making Test.  
47  
48  
49 275 • Anxiety and Depression symptom levels by the Beck Depression Inventory and Beck  
50  
51 276 Anxiety Inventory.  
52  
53  
54 277 • Subjective cognitive complaints using the Perceived Deficits Questionnaire.  
55  
56 278 Cognitive Outcome Measures [at discharge or 30 days if still in hospital, 26 weeks and 78  
57  
58 279 weeks]  
59  
60

- 1  
2  
3 280 • Addenbrooke's Cognitive Assessment III.  
4

5  
6 281 Clinical Outcomes  
7

- 8 282 • Incidence of epilepsy.  
9  
10  
11 283 • Time to hospital discharge.  
12  
13 284 • Requirement of high dependency unit or Intensive care unit admission up to 30 days  
14  
15 285 post randomisation.  
16  
17  
18 286 • Time taken to be free of ventilatory support for 14 days [if any].  
19  
20  
21 287 • Time to reach maximum recorded Glasgow coma scale score.  
22  
23 288 • Survival.  
24

25 289 Disability & Functional Outcomes [at discharge or 30 days if still in hospital, 26 weeks and 78  
26  
27 weeks]:  
28 290

- 29  
30 291 • Modified Rankin Score, Barthel Index, Liverpool Outcome Score and Glasgow  
31  
32 Outcome Scale Extended.  
33 292

34  
35 293 Imaging Outcomes: Change from Baseline at 2 weeks, 26 weeks and 78 weeks  
36

- 37  
38 294 • Temporal lobe volume (as % of intra-cranial volume).  
39  
40 295 • Whole brain volume (as % of intra-cranial volume).  
41  
42  
43 296 • Volume of affected region as seen on fluid-attenuated inversion recovery (FLAIR)  
44  
45 297 image (as % of intra-cranial volume).  
46  
47  
48 298 • Volume of affected region as seen on diffusion-weighted image (as % of intra-cranial  
49  
50 299 volume).  
51

52 300 Biomarker Outcomes:  
53

- 54  
55 301 • Transcriptomic and proteomic profiling on blood at convalescence (2 weeks and 26  
56  
57 302 weeks), compared to acute baselines, and on CSF at 2 weeks compared to acute  
58  
59 303 baseline.  
60

- 1  
2  
3 304       • Anti-NMDA receptor antibody testing at 26 weeks.  
4

5  
6 305 Safety Outcomes:  
7

- 8 306       • Proportion of patients with detectable HSV in CSF by PCR at 2 weeks.  
9

10  
11 307 Health Status and Quality of Life [at 26 and 78 weeks]:  
12

- 13 308       • Measured by the EuroQoL-5 Dimension-5 Level quality of life scale (EQ-5D-5L) and 36  
14  
15 309       item short form survey (SF-36) self-completed questionnaires.  
16  
17

18  
19 310

20  
21 311 **Screening**  
22

23 312 The majority of potential patients are identified by the local research team through  
24  
25 313 identifying patients with a relevant clinical presentation suspicious of HSV encephalitis and/or  
26  
27 314 detection of HSV in a CSF sample. A screening log is completed for all potential patients. A  
28  
29 315 strong link with the local laboratory is essential as a key factor in ensuring eligible patients are  
30  
31 316 not missed by the investigative team. Investigators for the local research team include  
32  
33 317 neurologists, infectious disease clinicians, microbiologist and virologists.  
34  
35  
36  
37

38 318

39  
40 319 Because this is an uncommon disease, extra measures have been taken to try and maximise  
41  
42 320 recruitment. On identifying a suitable patient, sites are able to contact the trial management  
43  
44 321 team for intensive support via a dedicated telephone hotline, email, or an app. Short videos  
45  
46 322 which explain the trial to patients, families and to health care workers also support  
47  
48 323 recruitment. Every month, the trial management group monitor the screening reports of each  
49  
50 324 site for the previous 3 months, to ensure they are actively looking for patients. Lower than  
51  
52 325 expected screening is followed up by the central study team making contact with the study  
53  
54 326 site to review their screening methodology and offer support.  
55  
56  
57  
58  
59  
60

1  
2  
3 3274  
5  
6 3287  
8 329 **Randomisation**

9  
10 330 Participants are randomised using a 24-hour secure web-based programme, which is centrally  
11  
12 331 controlled by the clinical trials research centre. Designated members of the trial team at the  
13  
14 332 site (detailed on the delegation of responsibilities log) are provided with a unique username  
15  
16 333 and password which is required to access the web-based randomisation system. In the event  
17  
18 334 of system failure, the patient can be randomised centrally electronically or through secure  
19  
20 335 envelopes. Each participant is allocated a unique study number (randomisation number), the  
21  
22 336 primary identifier for all the participants in this study.

23  
24  
25  
26  
27 337

28  
29 338 The neuropsychologist collecting the primary outcome and other outcome assessors such as  
30  
31 339 radiologists and those responsible for paper authorship are blinded to randomisation during  
32  
33 340 the trial. Trial participants and local site study teams, as well as the trial manager and trial  
34  
35 341 data manager at the clinical trials unit are aware of what treatments have been allocated. The  
36  
37 342 independent data safety and monitoring committee (IDSMC) and statisticians have access to  
38  
39 343 unblinded data grouped by intervention throughout the trial and make recommendations to  
40  
41 344 the trial's steering committee who would only become unblinded in the event of a serious  
42  
43 345 event.

44  
45  
46  
47 34648  
49 347 **Participant timeline**

50  
51  
52 348 The time schedule for enrolment, interventions and assessments is given in table 1.

53  
54  
55  
56  
57  
58 349

## 350 **Statistical Considerations**

351

## 352 **Sample Size**

353 The primary outcome variable is verbal memory , assessed as part of WMS-IV. In one  
354 published series of adults who survived HSV encephalitis, 19 of 22 had memory impairment  
355 evident at follow up, with verbal memory being most severely affected <sup>12</sup>. In that study the  
356 mean (standard deviation, SD) verbal memory score was 88.9 (18.9) compared with the  
357 population mean (SD) of 100 <sup>15</sup>. This score can only be assessed in survivors, we estimate  
358 approximately 10% of patients in the trial will die before assessment of the primary  
359 outcome<sup>8,41,42</sup>. In instances where the death is judged to be associated with encephalitis the  
360 verbal memory score is recorded as 40, (the lowest possible value which would be obtained  
361 even where a patient recorded no recall of any of the items administered in the memory  
362 subtests). Where the cause of death is thought to be independent of having encephalitis,  
363 those patients will be recorded as lost to follow up. Similarly, for patients who are too unwell,  
364 due to encephalitis, to undergo the assessment, the score is recorded as 40. Decisions as to  
365 whether the reasons for death or non-completion of the measures were due to encephalitis  
366 will be made by an independent committee blinded to dexamethasone allocation. Adjusting  
367 the estimate of mean and standard deviation from survivors, to include the 10% of patients  
368 with the lowest possible value of 40, gives a total population mean of 84.8, with a standard  
369 deviation of 23.1. A final sample size of 36 participants per group allows us to detect a  
370 clinically meaningful difference of 15.5 on the verbal memory score with 80% power, at a two-  
371 sided significance level of 0.05. Allowing for up to 20% dropout gives an initial target sample  
372 size of 45 participants per group, for a total of 90.

373

1  
2  
3 374 **Statistical analysis**  
4

5  
6 375 For the primary outcome, participants are included in the analysis based on the intention-to-  
7  
8 376 treat principle. Verbal memory score will be compared between groups using linear  
9  
10 377 regression. The model will be adjusted for pre-specified variables which are judged to be  
11  
12 378 potentially related to the outcome, including age and admission Glasgow coma scale score.  
13  
14  
15 379 No interim analysis is planned, but there is regular monitoring by the IDSMC.  
16

17  
18 380

19  
20 381 As there may be some missing primary outcome data due to death, inability to complete the  
21  
22 382 assessment, or loss to follow up, a sensitivity analysis will be carried out. All randomised  
23  
24 383 patients will be included in this analysis.  
25

26  
27  
28 384

29  
30 385 For continuous secondary outcome variables, comparisons between groups will be analysed  
31  
32 386 as per the primary outcome. The results for residual viral presence in the CSF at 2 weeks will  
33  
34 387 be reported with a 95% confidence interval for the difference in proportions between groups.  
35  
36 388 Time to event outcomes will be analysed using Kaplan-Meier curves, log rank tests and Cox  
37  
38 389 Proportional Hazards models. Binary secondary outcomes will be analysed using logistic  
39  
40 390 regression.  
41  
42  
43  
44

45 391

46  
47  
48 392 **Trial Promotion and engagement**  
49

50  
51 393 Considerable effort is maintained to keep the principal investigators, research nurses and the  
52  
53 394 community engaged in the trial. The trial is being publicised using public forums, the  
54  
55 395 Encephalitis Society website and newsletter, social media, patient journey articles and work  
56  
57 396 with newspapers and TV. To promote site engagement, study days are arranged for research  
58  
59  
60

1  
2  
3 397 teams to attend, along with scheduled research nurse teleconferences to allow ideas on  
4  
5  
6 398 maximising recruitment and updates on trial progress to be shared. Sites are also kept  
7  
8 399 updated through our website ([www.dexenceph.org.uk](http://www.dexenceph.org.uk)), newsletters and an innovative sticker  
9  
10 400 chart, whereby a sticker is sent out to every site each time a patient is recruited (Figure 2).  
11  
12  
13 401 The Encephalitis Society are playing a key role in providing additional support to the patients  
14  
15 402 and their families aside from their work for the trial.

16 403

17 404

### 18 405 **Trial Closure**

19  
20  
21  
22  
23  
24 406 The end of the trial is defined to be the date on which data for all participants is frozen and  
25  
26 407 data entry privileges are withdrawn from the trial database. The trial may be closed  
27  
28 408 prematurely by the trial steering committee, on the recommendation of the IDSMC if there is  
29  
30 409 sufficient evidence of risk to patient safety.

### 31 410 **Pharmacovigilance**

32  
33  
34 411 Oversight of the trial is provided by the trial steering committee, which meets at least annually  
35  
36 412 to review trial progress, safety, and adverse events. The committee is also informed of any  
37  
38 413 protocol changes by the clinical trial research unit.

39  
40  
41 414 The Medicines for Human Use (Clinical Trials) Regulations 2004 (SI 2004/1031) definitions are  
42  
43 415 used for Adverse Event (AE), Adverse Reaction (AR), Unexpected Adverse Reaction (UAR),  
44  
45 416 Serious Adverse Event (SAE), Serious Adverse Reaction (SAR) or Suspected Unexpected  
46  
47 417 Serious Adverse Reaction (SUSAR).

48  
49 418 Depending on the nature of the event the reporting procedures below are followed:  
50  
51  
52  
53  
54  
55  
56  
57  
58  
59  
60



1  
2  
3 419 1. Serious adverse events occurring up to 30 days after randomisation are reported through  
4  
5  
6 420 a Serious Adverse Event Form (if serious) or in the 30 day/discharge case record forms (CRF)  
7  
8 421 if they are a notable event (Positive PCR in CSF at 2nd lumbar puncture, gastrointestinal bleed,  
9  
10 422 hyperglycaemia requiring change in medical management, opportunistic infections,  
11  
12  
13 423 unexpected/severe neuropsychiatric events).

14  
15  
16 424 2. Serious adverse events occurring after 30 days from randomisation are monitored through  
17  
18 425 reporting in the CRFs with safety data collected in the 26 week and 78-week CRFs if serious.

19  
20  
21 426 The research investigator at each study site (or designated other) assesses all adverse events  
22  
23 427 for seriousness, causality and severity. The Chief Investigator (or designated other) assesses  
24  
25  
26 428 all adverse drug reactions for expectedness from known side effects of the use of  
27  
28  
29 429 Dexamethasone.<sup>43</sup> All serious ARs, AEs and SUSARs occurring up to 30 days from  
30  
31 430 randomisation (apart from death unless the investigator suspects causality) require reporting  
32  
33  
34 431 to the clinical trials unit, within 24 hours of the site becoming aware of the event. In the case  
35  
36 432 of death of a patient causality will be assessed by the trial steering committee.

37  
38  
39 433 The clinical trials unit will notify the Medicines and Healthcare products Regulatory Agency  
40  
41 434 and main research ethics committee of all SUSARs that occur during the study according to  
42  
43  
44 435 the following timelines; fatal and life-threatening within 7 days of notification and non-life  
45  
46 436 threatening within 15 days. All investigators are informed of all SUSARs occurring throughout  
47  
48  
49 437 the study.

50  
51  
52 438 SAEs occurring after 30 days from randomisation are monitored by the clinical trials unit via  
53  
54 439 the 26 week and 78week CRFs. These CRFs need to be received at the clinical trials research  
55  
56  
57 440 unit by 4 weeks after the 26 and 6 weeks after 78week time points.  
58  
59  
60

1  
2  
3 441 Safety data is provided to the IDSMC, who are responsible for safeguarding the interests of  
4  
5  
6 442 trial participants and assessing the safety of the interventions during the trial; the IDSMC  
7  
8 443 ensures action is taken as needed should they become aware of trends in reported AEs that  
9  
10  
11 444 raise safety concerns.

### 12 13 445 **Trial Funding and Financial Arrangements**

14  
15  
16 446  
17  
18 447 Contractual agreements are in place between the Sponsor and collaborating centres that  
19  
20  
21 448 describe financial arrangements. Trial participants are not paid to participate in the trial but  
22  
23  
24 449 are paid travel expenses for the follow up visits, estimated at £50 per visit. Payments to sites  
25  
26 450 are made per site initiation but the bulk of payments are made per patient recruitment. Sites  
27  
28 451 receive payment for: clinical time oversight, research nurse time, administrative support,  
29  
30  
31 452 magnetic resonance imaging scanning and pharmacy oversight.

32  
33 453

### 34 35 454 **Patient and public involvement**

36  
37  
38 455 The Encephalitis Society was consulted and provided advice on the design of the trial and the  
39  
40  
41 456 difficulties participants and their families will likely encounter. The Chief Executive of The  
42  
43 457 Encephalitis Society is a co-applicant on the grant application and a co-author on this paper.

44  
45 458

46  
47  
48 459 The Encephalitis Society has also provided patient representatives at our trial steering  
49  
50  
51 460 committee and assisted in the production and dissemination of trial promotional materials.

52  
53 461 The Encephalitis Society will drive forward publication and dissemination of the trial findings  
54  
55 462 among lay, therapeutic and health professionals through the use of web materials,  
56  
57  
58 463 newsletters and guides as well as at conferences and seminars in relation to encephalitis and  
59  
60

1  
2  
3 464 related fields. All patients and their family/carers will be acknowledged in any outputs from  
4  
5  
6 465 the trial. We also work with The Encephalitis Society on a programme  
7  
8 466 of teaching events and produce guides for healthcare professionals and lay people.  
9  
10 467 In instances where trial participants and their families have ongoing difficulties the central  
11  
12  
13 468 study team seek help for them through the Encephalitis Society and appropriate specialists  
14  
15 469 for further assistance.  
16  
17

18 470

19  
20  
21 471

## 22 23 472 **Ethics and Dissemination**

24  
25  
26 473

27  
28 474 The trial falls within the remit of the EU Directive 2001/20/EC, transposed into UK law as the  
29  
30  
31 475 UK Statutory Instrument 2004 No 1031: Medicines for Human Use (Clinical Trials) Regulations  
32  
33 476 2004 as amended. This trial is registered with the MHRA and granted Clinical Trial  
34  
35 477 Authorisation (CTA). The EUDRACT number for CTA reference is 2015-001609-16. Ethical  
36  
37 478 approval has been obtained from a multi-centre research ethics committee familiar with the  
38  
39 479 principals of the Mental Capacity Act 2005 guidance for sites in England and Wales and the  
40  
41 480 Adults with Incapacity Act 2008 for sites in Scotland as the principals are relevant to a clinical  
42  
43 481 trial of investigational medicinal products (CTIMP). Clinical Research Governance approval  
44  
45 482 was given through the Sponsor, The University of Liverpool. The trial protocol was approved  
46  
47 483 by a National Research Ethics Service Committee reference is 2015-001609-16 (Attained  
48  
49 484 31/03/2016) and underwent independent review at the Research and Development offices  
50  
51 485 at participating sites. This study abides by the principles of the World Medical Association  
52  
53 486 Declaration of Helsinki (1964) and Tokyo (1975), Venice (1983), Hong Kong (1989) and South  
54  
55  
56  
57  
58  
59  
60

1  
2  
3 487 Africa (1996). Due to the nature of this trial it also abides by the Medicine for Human Use  
4  
5 488 (Clinical Trials) regulations 2004 (S.I.2004:1031) and all following amendments which are  
6  
7  
8 489 incorporated into UK law.  
9

10 490

### 13 491 **Informed Consent Process**

15 492

17  
18 493 In obtaining and documenting informed consent, the investigators adhere to National  
19  
20 494 Institute for Health Research (NIHR) Good Clinical Practice (GCP) guidelines and the ethical  
21  
22 495 principles derived from the Declaration of Helsinki. Staff delegated by the principal  
23  
24 496 investigator and appropriately trained with experience in obtaining informed consent, discuss  
25  
26 497 the objectives, risks and inconveniences of the trial and the conditions under which it is to be  
27  
28 498 conducted with the patient or if the patient lacks capacity with a legal or professional  
29  
30 499 representative. Trial information documents and points of contact for further information are  
31  
32 500 provided and the potential participants are given adequate time to consider their  
33  
34 501 decision(supplementary file 1).  
35  
36  
37  
38  
39

40 502

41  
42 503 As this is a CTIMP, the clinical trial regulations for incapacitated adults are followed  
43  
44 504 (Medicines for Human Use Clinical Trial Regulations 2004 and amendments). When a legal  
45  
46 505 representative has given consent for a patient to participate in the trial and the patient  
47  
48 506 subsequently regains capacity, the research team will provide the patient information sheet  
49  
50 507 and request consent from the participant. Patients are allowed to withdraw from the study  
51  
52 508 at any point and may request withdrawal of their data collected until this point. Prospective  
53  
54 509 consent can also be obtained prior to a positive PCR result so participants may have adequate  
55  
56 510 time for contemplation.  
57  
58  
59  
60

1  
2  
3 511  
4  
5  
6 512

As suspected encephalitis is a medical emergency, a deferred consent process is used for the collection and retention of some samples as part of routine clinical management. Using emergency deferred consent for samples involves taking additional samples of blood and CSF only if the procedure is being performed for clinical care. If deferred consent has been used, written consent is requested from either the patient or a legal representative as soon as is possible and appropriate, with samples discarded if this is declined. This approach is based on discussions with patients and the public through the Encephalitis Society.

7  
8 513  
9  
10 514  
11  
12  
13 515  
14  
15 516  
16  
17 517  
18  
19 518  
20  
21  
22  
23 519

#### 520 **Data Capture Methods**

24  
25 520  
26  
27 521

Data is stored securely in line with the Data Protection Act 1998. The randomisation system, data capture form and CRF have been designed to optimally protect participant information and to maintain confidentiality. Trial data is captured at local sites using paper CRFs. These are then sent into the clinical trials research unit for data entry into the study specific database. Completed CRFs are returned to clinical trial research centre within 7 days of completion. A copy of the CRF sent over to the clinical trials research unit is retained at site. CRFs and consent forms are stored separately and securely at all times in dedicated areas of the clinical trials research unit.

28  
29  
30 522  
31  
32 523  
33  
34 524  
35  
36 525  
37  
38 526  
39  
40 527  
41  
42 528  
43  
44 529

CRFs are checked for data quality by the clinical trials research unit in Liverpool responsible for ensuring data collection and storage.

45  
46  
47 530  
48  
49 531  
50  
51 532

Patients' anonymised and labelled neuroimaging data are put on to discs at site and sent to the clinical trials research unit; the images can also be transferred via the Image Exchange

1  
2  
3 535 Portal in an encrypted manner. The final dataset will be solely accessible to the central study  
4  
5  
6 536 team at the University of Liverpool for analysis and write up.  
7

8 537  
9

## 10 538 **Dissemination**

11  
12  
13 539

14  
15 540 The results of the DexEnceph trial will be published in a high impact journal in a timely manner  
16  
17 541 to present the findings to front-line clinicians. They will be presented at the annual conference  
18  
19 542 organised by the Encephalitis Society and at other meetings. Authorship of the final papers  
20  
21 543 will be determined in accordance with the international committee of medical journal editors'  
22  
23 544 guidelines. The investigators will be involved in the preparation and drafting of the  
24  
25 545 manuscripts. There is no intended use of professional writers.  
26  
27  
28  
29

30 546  
31

32 547  
33

34 548  
35

36 549  
37  
38

## 39 550 **Discussion**

40  
41  
42 551

43  
44  
45 552 This protocol describes the design of a randomised controlled trial to demonstrate the utility  
46  
47 553 of using dexamethasone in the management of individuals with HSV encephalitis. HSV  
48  
49 554 encephalitis is a rare sporadic acute disease, and the trial has been designed to take this  
50  
51 555 challenge into account, along with the practicalities of running the trial in a UK National Health  
52  
53 556 Service setting. In particular lessons were learnt from a previous similar European study, the  
54  
55 557 German trial of Aciclovir and Corticosteroids in Herpes simplex virus Encephalitis (GACHE  
56  
57  
58 558 trial), which was stopped early because of recruitment difficulties. Recruitment to the GACHE  
59  
60

1  
2  
3 559 trial necessitated patients had focal neurological signs of no longer than five days prior to  
4  
5  
6 560 admission, whilst DexEnceph has less stringent criteria and reflects the diverse ways in which  
7  
8 561 HSV encephalitis may present. DexEnceph has been designed to be both practical and  
9  
10 562 pragmatic, in that patients must be recruited within 7 days of the PCR result becoming  
11  
12  
13 563 available. This allows for occasions where it may take longer to get the PCR performed, and  
14  
15 564 also allows time for patients admitted to district general hospitals, which may not be study  
16  
17  
18 565 centres, to be transferred to larger hospitals which are. DexEnceph also has the advantage in  
19  
20 566 that its recruitment projections were based on preliminary data garnered from the ENCEPH-  
21  
22  
23 567 UK NIHR program ([www.encephuk.org](http://www.encephuk.org)) and from a multicentre cohort study of encephalitis  
24  
25 568 in England, run by the Health Protection Agency (fore-runner to the Health Protection  
26  
27  
28 569 Agency).<sup>9</sup> These two studies provided direct information on the number of HSV encephalitis  
29  
30 570 patients presenting to UK hospitals. Our choice of an open label observer-blind study, rather  
31  
32  
33 571 than a placebo-controlled double-blind trial, avoided the logistic challenges of ensuring  
34  
35 572 blinded study drug was available across the large number of centres, necessitated by a rare  
36  
37  
38 573 sporadic disease, which may also have been a factor in the recruitment difficulties  
39  
40 574 experienced by the GACHE trial. We are confident our robust monitoring and trial promotion  
41  
42 575 ensures the majority of eligible patients are recruited. N- methyl-D-aspartic acid (NMDA)  
43  
44  
45 576 receptor antibody encephalitis (which is treated with corticosteroids and other  
46  
47 577 immunomodulatory therapies) is being recognised increasingly as a late complication of HSV  
48  
49 578 encephalitis.<sup>44,45</sup> DexEnceph may also be able examine whether corticosteroids reduce the  
50  
51  
52 579 incidence of this complication. If there is demonstrable efficacy of corticosteroid in improving  
53  
54  
55 580 neuropsychological, imaging and quality of life outcomes, without compromising patient  
56  
57 581 safety the results will be far reaching.

1  
2  
3 582  
4  
56 583 **Collaboration with France**  
7  
8

9 584 Because we recognised from the start that there may be difficulties keeping to recruitment  
10  
11 585 targets in the DexEnceph study, we worked with colleagues in France to develop a parallel  
12  
13 586 French study (DexEnceph-France). This follows the UK DexEnceph protocol as closely as  
14  
15 587 possible, whilst being pragmatic about the constraints of a different country's health care  
16  
17 588 system. The French trial is based in 10 hospitals with the lead centre being Grenoble Alpes  
18  
19 589 University Hospital and the aim of recruiting 30 patients.  
20  
21  
22

23  
24 590 The intention is for the two trials to be analysed separately, with the option of also results  
25  
26 591 also combining them into an overall analysis which will give additional power to detect a  
27  
28 592 treatment effect.  
29  
30  
31

32 593  
33  
34 594  
35  
36 595  
37  
38 596  
39  
4041 597 **Trial status**  
42

43 598 The trial has been open across the UK since August 2016, and as of July 2019 is open at 45  
44  
45 599 NHS trusts; 71 patients have been randomised (of the total target of 90) meaning that we  
46  
47 600 have recruited 79% of the patients are recruiting at just over 80% of the target recruitment  
48  
49 601 rate. The trial was due to complete recruitment later in 2020 with 6 months follow up and 3  
50  
51 602 months post trial closure for write up. Though recent COVID-19 pandemic has placed  
52  
53 603 difficulties in conducting trials and paused recruitment, the primary outcome has not been  
54  
55 604 missed in any existing DexEnceph recruit, this has been achieved by conducting  
56  
57  
58  
59  
60



1  
2  
3 605 neuropsychology assessment by either telephone or online video discussion, thus avoiding  
4  
5  
6 606 any risk of transmission. DexEnceph-France study, which opened in 2018 has recruited 10  
7  
8 607 patients from 10 sites.  
9

10 608  
11  
12  
13 609 If you are interested to find out more information or to see if your trust is involved visit  
14  
15 610 [www.dexenceph.org.uk](http://www.dexenceph.org.uk) or for more information please email: [dexenceph@liverpool.ac.uk](mailto:dexenceph@liverpool.ac.uk).  
16  
17

18 611

19  
20 612

21  
22 613

23  
24 614

25  
26 615

## 27 28 29 30 616 **References**

31  
32  
33 617

- 34  
35 618 1. Davison KL, Crowcroft NS, Ramsay ME, Brown DWG, Andrews NJ. Viral encephalitis in  
36  
37 619 England, 1989-1998: What did we miss? *Emerg Infect Dis*. 2003;9(2):234-240.  
38  
39 620 doi:10.3201/eid0902.020218  
40  
41  
42 621 2. Whitley RJ. Herpes simplex encephalitis: Adolescents and adults. *Antiviral Res*.  
43  
44 622 2006;71(2-3 SPEC. ISS.):141-148. doi:10.1016/j.antiviral.2006.04.002  
45  
46  
47 623 3. Mailles A, Stahl J. Infectious Encephalitis in France in 2007: A National Prospective  
48  
49 624 Study. *Clin Infect Dis*. 2009;49(12):1838-1847. doi:10.1086/648419  
50  
51  
52 625 4. Granerod J, Cousens S, Davies NWS, Crowcroft NS, Thomas SL. New estimates of  
53  
54 626 incidence of encephalitis in England. *Emerg Infect Dis*. 2013;19(9):1455-1462.  
55  
56 627 doi:10.3201/eid1909.130064  
57  
58  
59 628 5. Solomon T, Hart IJ, Beeching NJ, Solomon T, Hart IJ, Beeching NJ. Viral encephalitis : a

- 1  
2  
3 629 clinician ' s guide. 2007;(October):288-305. doi:10.1136/jnnp.2007.129098  
4  
5  
6 630 6. Easton A. Encephalitis: raising awareness and collaborating in research. *Lancet*  
7  
8 631 *Neurol.* 2016;15(4):353. doi:10.1016/s1474-4422(16)00059-4  
9  
10 632 7. Mcgrath N, Anderson NE, Croxson MC, Powell KF. Herpes simplex encephalitis treated  
11  
12 with acyclovir: diagnosis and long term outcome. *J Neurol Neurosurg Psychiatry.*  
13 633  
14 634 1997;63:321-326. doi:10.1136/jnnp.63.3.321  
15  
16  
17 635 8. Jouan Y, Grammatico-Guillon L, Espitalier F, Cazals X, François P, Guillon A. Long-term  
18  
19 outcome of severe herpes simplex encephalitis: a population-based observational  
20 636  
21 study. *Crit Care.* 2015;19(1):345. doi:10.1186/s13054-015-1046-y  
22 637  
23  
24 638 9. Granerod J, Ambrose HE, Davies NWS, et al. Causes of encephalitis and differences in  
25  
26 their clinical presentations in England: A multicentre, population-based prospective  
27 639  
28 study. *Lancet Infect Dis.* 2010;10(12):835-844. doi:10.1016/S1473-3099(10)70222-X  
29 640  
30  
31 641 10. Raschilas F, Wolff M, Delatour F, et al. Outcome of and Prognostic Factors for Herpes  
32  
33 Simplex Encephalitis in Adult Patients: Results of a Multicenter Study. *Clin Infect Dis.*  
34 642  
35 643 2002;35(3):254-260. doi:10.1086/341405  
36  
37  
38 644 11. Egdell R, Egdell D, Solomon T. Herpes simplex virus encephalitis. *Bmj.* 2012;344(jun13  
39  
40 645 2):e3630-e3630. doi:10.1136/bmj.e3630  
41  
42  
43 646 12. Utlely TF, Ogden JA, Gibb A, McGrath N, Anderson NE. The long-term  
44  
45 neuropsychological outcome of herpes simplex encephalitis in a series of unselected  
46 647  
47 survivors. *Neuropsychiatry Neuropsychol Behav Neurol.* 1997;10(3):180-189.  
48 648  
49 <http://www.ncbi.nlm.nih.gov/pubmed/9297711>.  
50 649  
51  
52 650 13. Frisch S, Thiel F, Marschhauser A, Villringer A, Horstmann A, Schroeter ML. Identifying  
53  
54 neural correlates of memory and language disturbances in herpes simplex  
55 651  
56 encephalitis: a voxel-based morphometry (VBM) study. *J Neurol.* 2015;262(3):563-  
57 652  
58  
59  
60

- 1  
2  
3 653 569. doi:10.1007/s00415-014-7604-4  
4  
5  
6 654 14. Pewter SM, Williams WH, Haslam C, Kay JM. Neuropsychological and psychiatric  
7  
8 655 profiles in acute encephalitis in adults. *Neuropsychol Rehabil.* 2007;17(4-5):478-505.  
9  
10 656 doi:10.1080/09602010701202238  
11  
12  
13 657 15. Hokkanen L, Poutiainen E, Valanne L, et al. Cognitive impairment after acute  
14  
15 658 encephalitis: comparison of herpes simplex and other aetiologies. *Neurosurgery, and*  
16  
17 659 *Psychiatry.* 1996;61(December 1994):478-484. doi:10.1136/jnnp.61.5.478  
18  
19  
20 660 16. Cooper J, Kierans C, Defres S, Easton A, Kneen R, Solomon T. Care beyond the hospital  
21  
22 661 ward: understanding the socio-medical trajectory of herpes simplex virus  
23  
24 662 encephalitis. *BMC Health Serv Res.* 2017;17(1):1-11. doi:10.1186/s12913-017-2608-2  
25  
26  
27 663 17. Cooper J, Kierans C, Defres S, Easton A, Kneen R, Solomon T. Diagnostic pathways as  
28  
29 664 social and participatory practices: The case of herpes simplex encephalitis. *PLoS One.*  
30  
31 665 2016;11(3):1-15. doi:10.1371/journal.pone.0151145  
32  
33  
34 666 18. Aurelius E, Andersson B, Forsgren M, Sköldenberg B, Strannegård. Cytokines and  
35  
36 667 other markers of intrathecal immune response in patients with herpes simplex  
37  
38 668 encephalitis. *J Infect Dis.* 1994;170(3):678-681. doi:10.1093/infdis/170.3.678  
39  
40  
41 669 19. Sköldenberg B, Aurelius E, Hjalmarsson A, et al. Incidence and pathogenesis of clinical  
42  
43 670 relapse after herpes simplex encephalitis in adults. *J Neurol.* 2006;253(2):163-170.  
44  
45 671 doi:10.1007/s00415-005-0941-6  
46  
47  
48 672 20. Michael BD, Griffiths MJ, Granerod J, et al. Characteristic Cytokine and Chemokine  
49  
50 673 Profiles in Encephalitis of Infectious, Immune-Mediated, and Unknown Aetiology.  
51  
52 674 *PLoS One.* 2016;11(1):e0146288. doi:10.1371/journal.pone.0146288  
53  
54  
55 675 21. Wnęk M, Ressel L, Ricci E, et al. Herpes simplex encephalitis is linked with selective  
56  
57 676 mitochondrial damage; a post-mortem and in vitro study. *Acta Neuropathol.*

- 1  
2  
3 677 2016;132(3):433-451. doi:10.1007/s00401-016-1597-2  
4  
5  
6 678 22. Rösler A, Pohl M, Braune HJ, Oertel WH, Gemsa D, Sprenger H. Time course of  
7  
8 679 chemokines in the cerebrospinal fluid and serum during herpes simplex type 1  
9  
10 680 encephalitis. *J Neurol Sci.* 1998;157(1):82-89. doi:10.1016/S0022-510X(98)00061-6  
11  
12  
13 681 23. Kamei S, Taira N, Ishihara M, et al. Prognostic value of cerebrospinal fluid cytokine  
14  
15 682 changes in herpes simplex virus encephalitis. *Cytokine.* 2009;46(2):187-193.  
16  
17 683 doi:10.1016/j.cyto.2009.01.004  
18  
19  
20 684 24. Taira N, Kamei S, Morita a, et al. Predictors of a prolonged clinical course in adult  
21  
22 685 patients with herpes simplex virus encephalitis. *Intern Med.* 2009;48(2):89-94.  
23  
24 686 doi:10.2169/internalmedicine.48.1445  
25  
26  
27 687 25. Kapur N, Barker S, Burrows EH, et al. Herpes simplex encephalitis: long term magnetic  
28  
29 688 resonance imaging and neuropsychological profile. *Neurol Neurosurg Psychiatry.*  
30  
31 689 1994;5757:1334-1342. doi:10.1136/jnnp.57.11.1334  
32  
33  
34  
35 690 26. Meyding-Lamadé UK, Oberlinner C, Rau PR, et al. Experimental herpes simplex virus  
36  
37 691 encephalitis: a combination therapy of acyclovir and glucocorticoids reduces long-  
38  
39 692 term magnetic resonance imaging abnormalities. *J Neurovirol.* 2003;9(1):118-125.  
40  
41 693 doi:10.1080/13550280390173373  
42  
43  
44  
45 694 27. Sellner J, Dvorak F, Zhou Y, et al. Acute and long-term alteration of chemokine mRNA  
46  
47 695 expression after anti-viral and anti-inflammatory treatment in herpes simplex virus  
48  
49 696 encephalitis. *Neurosci Lett.* 2005;374(3):197-202. doi:10.1016/j.neulet.2004.10.054  
50  
51  
52 697 28. Meyding-lamade U, Seyfer S, Dvorak F, et al. Experimental herpes simplex virus  
53  
54 698 encephalitis: inhibition of the expression of inducible nitric oxide synthase in mouse  
55  
56 699 brain tissue. *Neurosci Lett.* 2002;318:21-24.  
57  
58  
59 700 29. Upton AR., Barwick D., Foster J. DEXAMETHASONE TREATMENT IN HERPES-SIMPLEX  
60

- 1  
2  
3 701 ENCEPHALITIS. *Lancet*. 1971;297(7693):290-291. doi:10.1016/S0140-6736(71)91019-1  
4  
5  
6 702 30. Habel AH, Brown JK. DEXAMETHASONE IN HERPES-SIMPLEX ENCEPHALITIS. *Lancet*.  
7  
8 703 1972;299(7752):695. doi:10.1016/S0140-6736(72)90505-3  
9  
10  
11 704 31. Defres S, Keller SS, Das K, et al. A feasibility study of quantifying longitudinal brain  
12  
13 705 changes in herpes simplex virus (HSV) encephalitis using magnetic resonance imaging  
14  
15 706 (MRI) and stereology. *PLoS One*. 2017;12(1):1-15. doi:10.1371/journal.pone.0170215  
16  
17  
18 707 32. de Gans J, van de Beek D. Dexamethasone in Adults with Bacterial Meningitis. *N Engl J*  
19  
20 708 *Med*. 2002;347(20):1549-1556. doi:10.1056/NEJMoa021334  
21  
22  
23 709 33. Kamei S. Evaluation of combination therapy using aciclovir and corticosteroid in adult  
24  
25 710 patients with herpes simplex virus encephalitis. *J Neurol Neurosurg Psychiatry*.  
26  
27 711 2005;76(11):1544-1549. doi:10.1136/jnnp.2004.049676  
28  
29  
30 712 34. Musallam B, Matoth I, Wolf DG, Engelhard D, Averbuch D. Steroids for Deteriorating  
31  
32 713 Herpes Simplex Virus Encephalitis. *Pediatr Neurol*. 2007;37(3):229-232.  
33  
34 714 doi:10.1016/j.pediatrneurol.2007.05.007  
35  
36  
37 715 35. Maraş Genç H, Uyur Yalçın E, Sayan M, et al. Clinical outcomes in children with herpes  
38  
39 716 simplex encephalitis receiving steroid therapy. *J Clin Virol*. 2016;80:87-92.  
40  
41 717 doi:10.1016/j.jcv.2016.05.002  
42  
43  
44 718 36. Nakano A, Yamasaki R, Miyazaki S, Horiuchi N, Kunishige M, Mitsui T. Beneficial effect  
45  
46 719 of steroid pulse therapy on acute viral encephalitis. *Eur Neurol*. 2003;50(4):225-229.  
47  
48 720 doi:10.1159/000073864  
49  
50  
51 721 37. Lizarraga KJ, Alexandre LC, Ramos-Estebanez C, Merenda A. Are steroids a beneficial  
52  
53 722 adjunctive therapy in the immunosuppressed patient with herpes simplex virus  
54  
55 723 encephalitis? *Case Rep Neurol*. 2013;5(1):52-55. doi:10.1159/000350572  
56  
57  
58 724 38. Mesker AJ, Bon GG, de Gans J, de Kruijk JR. Case report: a pregnant woman with

- 1  
2  
3 725 herpes simplex encephalitis successfully treated with dexamethasone. *Eur J Obstet*  
4  
5  
6 726 *Gynecol Reprod Biol.* 2011;154(2):231-232. doi:10.1016/j.ejogrb.2010.10.014  
7  
8 727 39. Martinez-Torres F, Menon S, Pritsch M, et al. Protocol for German trial of Acyclovir  
9  
10 728 and corticosteroids in Herpes-simplex-virus-encephalitis (GACHE): a multicenter,  
11  
12  
13 729 multinational, randomized, double-blind, placebo-controlled German, Austrian and  
14  
15 730 Dutch trial [ISRCTN45122933]. *BMC Neurol.* 2008;8:40. doi:10.1186/1471-2377-8-40  
16  
17  
18 731 40. The Medicines for Human Use (Clinical Trials) Regulations 2004.  
19  
20 732 <http://www.legislation.gov.uk/uksi/2004/1031/schedule/1/made>. Accessed June 19,  
21  
22 733 2019.  
23  
24  
25 734 41. Whitley RJ, Alford CA, Hirsch MS, et al. Vidarabine versus Acyclovir Therapy in Herpes  
26  
27 735 Simplex Encephalitis. *N Engl J Med.* 1986;314(3):144-149.  
28  
29 736 doi:10.1056/NEJM198601163140303  
30  
31  
32 737 42. Sköldenberg B, Alestig K, Burman L, et al. ACYCLOVIR VERSUS VIDARABINE IN HERPES  
33  
34 738 SIMPLEX ENCEPHALITIS. *Lancet.* 1984;324(8405):707-711. doi:10.1016/S0140-  
35  
36 739 6736(84)92623-0  
37  
38  
39 740 43. Spc. Dexamethasone SPC. 2014;(June):1-4.  
40  
41  
42 741 44. Gilbert GJ, Leypoldt F, Dalmau J. Herpes simplex virus-1 encephalitis can trigger anti-  
43  
44 742 NMDA receptor encephalitis: Case report. *Neurology.* 2014;82(22):2041-2041.  
45  
46 743 doi:10.1212/01.wnl.0000450946.75616.32  
47  
48  
49 744 45. Leypoldt F, Titulaer MJ, Aguilar E, et al. Herpes simplex virus-1 encephalitis can trigger  
50  
51 745 anti-NMDA receptor encephalitis: Case report. *Neurology.* 2013;81(18):1637-1639.  
52  
53 746 doi:10.1212/WNL.0b013e3182a9f531  
54  
55  
56  
57 747  
58  
59  
60 748

## Authors' Contributions

1  
2  
3 749 All authors were consulted and inputted into the article, below lists the particular role  
4  
5  
6 750 within DexEnceph  
7  
8 751 TW: Clinical research fellow, CF: Clinical research fellow, KD: trials manager, SD: contributor to trial  
9  
10 752 design and running, MG: Clinical and laboratory biomarkers lead, CH: Neuropsychology researcher,  
11  
12 753 RT: Trial pharmacist, GB: Trial statistician, AR-H: trial statistician, PM: Neuropsychology lead, KDas:  
13  
14 754 Neuroimaging lead, MZ: Virology, LP: Neuroimaging, SK: Neuroimaging, NR: Neuroimaging, EA:  
15  
16 755 Encephalitis Society Chief Executive advisor, ST: Study co-ordinator France, RK: Clinical lead brain  
17  
18 756 infections UK, JPS: Principle investigator France, TS: Chief Investigator responsible for the trial  
19  
20  
21  
22 757

### 758 **Trial Funding statement**

759 This trial is funded by the NIHR Efficacy and Mechanism Evaluation Programme for the  
760 Department of Health reference 12/205/28.

761

### 762 **Declaration of Interests**

763 TS is supported by the National Institute for Health Research (NIHR) Health Protection  
764 Research Unit in Emerging and Zoonotic Infections (Grant No. IS-HPU-1112-10117), NIHR  
765 Global Health Research Group on Brain Infections (No. 17/63/110), and the European Union's  
766 Horizon 2020 research and innovation program ZikaPLAN (Preparedness Latin America  
767 Network), grant agreement No. 734584.

768 Other authors: non declared

769

### 770 **Data Statement**

771 There are currently no current plans to publish the data, data is available on reasonable request.

772

773 **Word count:** 4900 words

774 **Figure Legends**

775

776 **Figure 1: Schematic design of DexEnceph randomised controlled trial**

777 **Figure 2 : DexEnceph Recruitment poster**

778 **Supplementary file 1: DexEnceph Information and Consent form**

779 **Table 1: Time scale for patients Randomised in the DexEnceph study**

780

| Procedures                                       | Follow-up Schedule |              |            |                                                        |          |          |                           |
|--------------------------------------------------|--------------------|--------------|------------|--------------------------------------------------------|----------|----------|---------------------------|
|                                                  | Screening          | Baseline     | 2 weeks    | Discharge or Day 30 of admission (whichever is sooner) | 26 weeks | 78 weeks | Premature Discontinuation |
| Signed Consent Form                              | X†                 | X*           |            |                                                        |          |          |                           |
| Assessment of Eligibility Criteria               | X                  | X*           |            |                                                        |          |          |                           |
| Review of Medical History                        |                    | X*           |            |                                                        |          |          |                           |
| Review of Concomitant Medications                |                    | X*           | X          | X                                                      | X        | X        | X                         |
| Physical Exam                                    |                    | X            |            | X                                                      |          |          |                           |
| Study Intervention                               |                    | X            |            |                                                        |          |          |                           |
| Clinical Data Collection                         |                    | X            |            | X                                                      | X        | X        |                           |
| Magnetic resonance imaging (MRI) scan            |                    | X $\mu$      | X          |                                                        | X        | X        |                           |
| Research Blood Testing                           |                    | X            | X          |                                                        | X        |          |                           |
| Lumbar Puncture                                  |                    | X $\gamma$   | X          |                                                        |          |          |                           |
| Disability & Functional Outcomes                 |                    |              |            | X                                                      | X        | X        |                           |
| Glasgow Coma Scale                               |                    | X $\infty$ * | X $\infty$ | X $\infty$                                             | X        | X        |                           |
| Addenbrooke's Cognitive Examination revised      |                    |              |            | X                                                      | X        | X        |                           |
| Neuropsychology assessment                       |                    |              |            |                                                        | X        | X        |                           |
| Health Status and quality of life questionnaires |                    |              |            |                                                        | X        | X        |                           |



| Procedures                                     | Follow-up Schedule |            |         |                                                        |          |          |                           |
|------------------------------------------------|--------------------|------------|---------|--------------------------------------------------------|----------|----------|---------------------------|
|                                                | Screening          | Baseline   | 2 weeks | Discharge or Day 30 of admission (whichever is sooner) | 26 weeks | 78 weeks | Premature Discontinuation |
| Clinical Laboratory: Haematology, Biochemistry |                    | X $\alpha$ |         |                                                        |          |          |                           |
| Assessment of Adverse Events                   |                    |            | (X)     | (X)                                                    | (X)      | (X)      | (X)                       |

781 † Only applicable when patients are prospectively consented for the randomised controlled trial

782 \*Procedures required before randomisation.

783  $\mu$  Baseline MRI done for clinical purposes can be done from hospital admission up to 7 days after randomisation

784  $\gamma$  Diagnostic lumbar puncture for clinical purposes done prior to randomisation

785  $\alpha$  Recording of clinical laboratory tests done for clinical purposes, NOT as part of trial

786  $\infty$  Recorded prior to randomisation, daily for the first 14 days and then weekly until Discharge/30 days (whichever sooner)

787 (X) – As indicated/appropriate

790

791

792

793

794

795

796

797

798

Figure 1: Schematic Design of DexEnceph randomised controlled trial

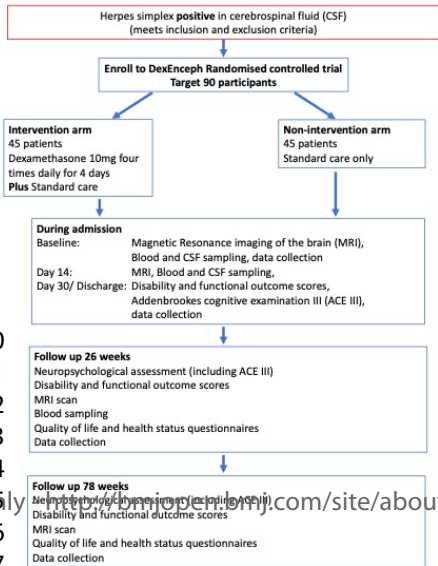

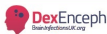

1  
2  
3  
4  
5  
6  
7  
8  
9  
10  
11  
12  
13  
14  
15  
16  
17  
18

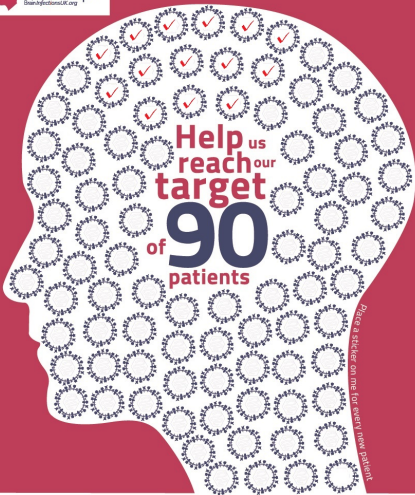

Place a sticker on me for every new patient.

15 ly <http://bmjopen> **Dexamethasone** /about/gu

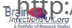

National Institute for Health Research

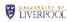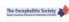

A Randomised Controlled Trial  
**Dexamethasone**  
in Herpes Simplex Virus Encephalitis

Hotline 0300 008 0007  
Landline 0151 794 9767

[dexenceph.org.uk](http://dexenceph.org.uk)  
dexenceph@liverpool.ac.uk



## RCT Adult with Capacity Information Sheet

Version 5.0, 25 May 2018

DexEnceph: A study of dexamethasone in adults with Herpes Simplex Virus (HSV) encephalitis  
Brain Infections Group, University of Liverpool

We understand this is a difficult and stressful time for you, so we firstly want to thank you for taking the time to read this leaflet.

You are being invited to take part in a research study on HSV encephalitis. This condition is extremely rare and is probably something you had never heard about before. This is why a team member will go through this leaflet with you, explaining what taking part in the study would involve and answering any questions.

### Important things you need to know

- This is a study for patients with encephalitis (swelling of the brain) caused by a virus called herpes simplex virus (HSV).
- Encephalitis can make you confused, drowsy, behave out of character, affect your sleep and memory, change your mood or may cause you to have fits.
- We want to find out if reducing the swelling with a drug called dexamethasone is of benefit to patient's memory in the longer term.
- In the study there will be two groups of patients, one that receives dexamethasone and one that does not.
- If you are in the group that receives dexamethasone this will be for 4 days in hospital.
- Both groups will have the same investigations to see if dexamethasone has been of benefit.
- Dexamethasone is a commonly used drug in brain swelling and many other conditions. Like all medicines, dexamethasone has side-effects. We will explain what these can be later.

### We would like to invite you to take part in a research study

- Before you decide to take part it is important you know why the research is being done and what it will involve.
- You can discuss with family, friends and clinical staff before making a decision.
- You are free to decide whether you would like to take part.
- If you choose to take part and then decide you no longer want to be involved you can stop taking part without giving a reason. Your care will not be affected.
- Please let us know if there is anything in this leaflet that is not clear or if you would like more information. A member of our team will answer your questions.
- If you decide to take part we will offer you a copy of this form and ask you to sign a consent form.

## HSV encephalitis

### 1. What is HSV encephalitis?

Encephalitis means swelling of the brain and has many different causes. It is often caused by a virus. Herpes Simplex Virus (HSV) is the most common virus that causes encephalitis in the UK.

HSV encephalitis is very rare. It is diagnosed by finding the virus in fluid around the brain and spinal cord. This fluid is called CSF (cerebrospinal fluid). The CSF is obtained by the doctor who performs a lumbar puncture (LP).

HSV encephalitis is treated with the drug aciclovir. Despite treatment, some people are left with significant loss of memory. About 2 out of every 3 people will have memory difficulties long term.

## The study

### 2. Why are we doing this study?

We know dexamethasone can reduce swelling. Reduction in swelling of the brain may improve the recovery of patients with HSV encephalitis.

This study, called DexEnceph, will allow us to compare the recovery of patients that received dexamethasone and those that did not.

### 3. Why have I been invited to take part?

There are two reasons why you may have been invited to take part:

**A.** Your doctors have diagnosed you with having HSV encephalitis.

**OR**

**B.** You may have been invited to take part before the diagnosis is made. This is because your doctors think there is a chance you may have HSV encephalitis. This will mean you have more time to think about taking part.

### 4. What will happen to me during the study?

All patients in the study will receive aciclovir. This is standard treatment for HSV encephalitis.

In addition, if you decide to take part in the study, you may be offered a short course of dexamethasone. This will be decided at random by a computer. This is to be fair, so neither you, your doctor, nor the research team, can choose whether you receive dexamethasone or not. Half of the people in the study will receive dexamethasone and half will not.

If you receive dexamethasone this will be 4 times a day for 4 days. It is given in a line you already have for clinical care.

## What taking part involves

### 5. What tests are done if I take part?



All the tests done when you sign up to the study and the CSF tests after 2 weeks will

be done as part of your care whether you take part in the study or not.

## 6. What do the memory tests involve?

These tests are the most important in the study as they will help us find out if dexamethasone improves memory problems from HSV encephalitis. These tests are sometimes called Neuropsychology tests. They are completed 6 and 18 months after the illness.

The key part of this test takes about 35 minutes. If you are not too tired we can continue with further tests that will provide useful information. These can take up to 2 hours.

They are not pass or fail tests. They provide information about your memory and thinking processes.

They can be done in one day or divided over a few short visits. If you have left hospital we can travel to see you in a convenient place for you. The test will be arranged on a day(s) which suits you.

The results can be added to your hospital notes for future reference if you wish or kept confidential within the trial.

## 7. What does the MRI scan involve?

As part of your care your doctor will organise an MRI scan when you are in hospital. If you take part in the study we will ask you to have another 3 scans later on.

MRI scans allow us to assess if the brain has been affected by the infection and, if so, which parts.

Each scan takes about 20 minutes. The scan can be noisy but you will be offered headphones.

The extra 3 scans are planned for:

- 2 weeks after the first one (when you are still in hospital)
- After 6 months
- After 18 months

The scans will be done at a hospital near you. We will reimburse mileage or public transport costs for any research visits.

We will check with you that you are still happy to have the scan each time. Sometimes scans may find something not related to this illness. If this happens the doctors looking at the scans will tell your own hospital doctors who will look into this further.

None of the research scans are compulsory so if you do not wish to have them you can still be part of the study.

## 8. Are there risks to having an MRI scan?

There are no known risks from an MRI scan. They do not use radiation. MRI scans are done routinely in patients with HSV encephalitis.

Because MRI scans use strong magnets you will not have the scan if you have any metal implants or fragments in your body.

Where you lie is quite enclosed and some people may find this unsettling. If you have a fear of confined spaces you should discuss this with your doctor before you go for the scan.

If you think you may be pregnant let your local research team know. We will not ask pregnant women to have MRI scans due to possible risks to the foetus.

## 9. What samples are collected? What does this involve?

We will collect blood and CSF samples during the study.

All patients with HSV encephalitis need a lumbar puncture (LP) when they come to hospital to find out why they are unwell. The doctor uses a small needle to take a sample from the lower part of the back. This is repeated after 2 weeks of treatment to see if all the virus has gone. Both lumbar punctures are part of the standard care in all patients with this condition.

We will take a little extra fluid at this time for the research tests. The amount of fluid we ask for each time is about 1 teaspoon, 5.5mls.

If you have already had a lumbar puncture before being told about the study, we will take stored CSF that is leftover for research tests.

Blood tests are requested at 3 different times spread over 6 months. We take between 1 to 4 teaspoons of blood, this is 5 to 23mls.

With these blood and CSF tests we will be able to better understand how the infection affects your body and how the body tries to defend itself against it.

#### 10. What will happen to the samples that are collected? Will any genetic tests be done?

All samples will be taken at your hospital and then transported to the University of Liverpool or other laboratories supporting the study. The samples will not have any of your personal information written on them. In the University they will be stored in a secure building.

There is an option for the blood and CSF collected to have tests looking at DNA. DNA is found in all cells of the body and contains the genetic information for the working of all human beings. This study collects DNA samples to find out why some people get HSV encephalitis and others do not, and why some people have severe problems due to HSV and others do not. The information we learn from DNA may benefit others with this condition in the future but will not influence your treatment or your future health.

Some of your samples may be left over. We will ask you if they can be used for this and future studies run by the University of Liverpool.

#### 11. How do you review activities of daily living?

We will find out how the illness has affected your day-to-day life.

The research team will look at your hospital notes. They may also talk to you and, if you choose, your relatives. This will happen when you are in hospital and when you have gone home.

We will compare patients who received dexamethasone to those that did not and see if it made a difference.

#### 12. What are the health questionnaires?

Two questionnaires will be sent through the post. They will ask you your views about your health and quality of life. Please send them back in a pre-paid envelope.

#### Dexamethasone

#### 13. What are the side effects of dexamethasone?

Dexamethasone is used widely in patients and the side-effects are well known as this medicine has been prescribed for a long time. A short course of dexamethasone will be prescribed in this study. Side effects are less common when dexamethasone is given for shorter periods.

It is important you know about the possible side-effects before you decide to take part. These are:

- Stomach pain, indigestion, having more appetite than usual, feeling or being sick.
- Feeling tired or fatigued
- Mood and behaviour changes, especially at the beginning.
- Higher blood sugars.

Other possible risks can include:

- Stomach ulcers and bleeding of ulcers.
- Decreased response to infections.

You will be in hospital when you take dexamethasone so you can tell your doctors immediately if you have any problem.

If you suffer side effects you or your doctor can decide to stop the dexamethasone at any point.

Dexamethasone is prescribed to women who are pregnant or breast feeding as there are no known risks to the foetus.

### Other things to consider

#### 14. Do I have to take part?

No, taking part is voluntary. If you agree, we will ask you to sign a consent form.

If you agree to take part you are free to change your mind at any time, without giving a reason. You may decide to have only some tests in the study without having to drop out of the study altogether. This will not affect the standard of care you receive.

If you withdraw from the study we will stop collecting data. We will ask you if we can use the information and samples we have gathered up to the point that you withdraw.

#### 15. What happens if there is a problem?

If you have any concerns about any part of this study, please speak with your hospital doctor (consultant) or one of your research team.

If you remain unhappy and wish to complain formally you can do this using the NHS Complaints Procedure. You can get information on how to do this from the Patients Advice Liaison department (PALS) in your hospital.

If you suffer harm from taking part in this study, there are no special compensation arrangements. If harm occurs to you and it is due to someone's negligence, you may have grounds for legal action for compensation against the NHS hospital where you are being treated but you may have to pay your legal costs.

#### 16. Who will know I have taken part in this study?

Only people in your clinical care team and people involved in the study will have access to personal data. With your consent we will tell your GP that you are taking part.

All information collected about you during this study will be confidential and anonymised. It will be handled, stored and destroyed in accordance with the General Data Protection Regulation.

University of Liverpool is the sponsor for this study based in the United Kingdom. We will be using information from you and your medical records in order to undertake this study and will act as the data controller for this study. This means that we are responsible for looking after your information and using it properly. University of Liverpool will keep identifiable information about you for 15 years after the study has finished.

Your rights to access, change or move your information are limited, as we need to manage your information in specific ways in order for the research to be reliable and accurate. If you withdraw from the study, we will keep the information about you that we have already obtained. To safeguard your rights, we will use the minimum personally-identifiable information possible.

You can find out more about how we use your information <http://www.dexenceph.org.uk/>. Our Data Protection Officer is Victoria Heath and you can contact them at [V.Heath@liverpool.ac.uk](mailto:V.Heath@liverpool.ac.uk).

### Benefits and risks

#### 17. What are the benefits of taking part?

You may benefit from receiving dexamethasone, however we will not know this until the end of the study. You



may also benefit from the increased monitoring of having extra scans and memory tests.

The information we get from this study may benefit patients in the future.

**18. What are the possible disadvantages and risks of taking part?**

The disadvantage in taking part in this study may be the risk of having the side-effects of dexamethasone listed in question 13 (this will not be the case if you are in the group that does not have dexamethasone).

There is the inconvenience of having the dexamethasone through the drip when you are in hospital. Once you leave hospital there is the inconvenience of travelling to hospital for 2 scans, having the memory tests and completing questionnaires.

**Contact details**

If you have any questions about this study, then please contact the study team members:

Principal Investigator (Doctor leading this study in your hospital):

Name: \_\_\_\_\_

\_\_\_\_\_

Telephone: \_\_\_\_\_

Research Nurse:

Name: \_\_\_\_\_

\_\_\_\_\_

Telephone: \_\_\_\_\_

Name of your Hospital: \_\_\_\_\_

**Further information**

This study is being run at your hospital and many other NHS hospitals throughout the UK. It aims to recruit 90 patients over 4 years.

It is organised by the University of Liverpool and is funded by the National Institute for Health Research (NIHR), the public body in charge of research in the UK.

Our study team includes The Encephalitis Society, a charity that supports patients and families ([www.encephalitis.info](http://www.encephalitis.info)).

The study has been reviewed for scientific content by expert members of NIHR. The National Research Ethics Service Committee Liverpool Central has reviewed the study and given approval for it to take place.



### RCT Adult with Capacity Consent Form

Version 5.0, Dated: 25/May/2018

EudraCT Number: 2015-001609-16

Centre Name:

Centre Code:

Name of Principal Investigator:

Study Number:

Please complete this form. When completed give one copy to the participant to keep, send one copy to CTU [fax/encrypted email/post], and keep one in the participant's medical notes. Please put the original in the site file.

**For patient: once you have understood each statement please initial the YES OR NO box**

**YES****NO**

|                                                                                                                                                                                                                                                                                                                                             |                   |                  |
|---------------------------------------------------------------------------------------------------------------------------------------------------------------------------------------------------------------------------------------------------------------------------------------------------------------------------------------------|-------------------|------------------|
| 1. I confirm I have read and understand the Information Leaflet (dated DD/MMM/YYYY) for the above study, and have had the opportunity to ask questions and have these answered satisfactorily.                                                                                                                                              | INITIAL<br>IF YES | INITIAL<br>IF NO |
| 2. I agree to take part in this study.                                                                                                                                                                                                                                                                                                      | INITIAL<br>IF YES | INITIAL<br>IF NO |
| 3. I understand that my participation is voluntary and that I am free to withdraw from the study at any time without giving a reason and without my care or legal rights being affected.                                                                                                                                                    | INITIAL<br>IF YES | INITIAL<br>IF NO |
| 4. I agree for my consent form and contact details to be passed to the University of Liverpool for the administration of the study.                                                                                                                                                                                                         | INITIAL<br>IF YES | INITIAL<br>IF NO |
| 5. I understand that relevant sections of my medical notes and any data collected during the study may be looked at by authorised individuals from the research and clinical team and Regulatory Authorities where it is relevant to my taking part in this research. I give permission for these individuals to have access to my records. | INITIAL<br>IF YES | INITIAL<br>IF NO |
| 6. I agree for genetic tests to be done on blood and CSF collected. I understand these genetic tests will not be of any individual significance to me.                                                                                                                                                                                      | INITIAL<br>IF YES | INITIAL<br>IF NO |

7. I agree to have MRI scans as part of the trial.

INITIAL  
IF YES

INITIAL  
IF NO

8. I agree for my GP and hospital doctors to be informed if the scan picks up something unexpected.

INITIAL  
IF YES

INITIAL  
IF NO

9. I agree to gift the remainder of any blood or CSF sample to the University of Liverpool where it will be stored for use in future research. This may include genetic tests.

INITIAL  
IF YES

INITIAL  
IF NO

10. I agree to any images or scans that are taken to be used for teaching, education and publication (in scientific journals, books or internet).

INITIAL  
IF YES

INITIAL  
IF NO

11. I agree for my GP to be informed I am taking part in this study.

INITIAL  
IF YES

INITIAL  
IF NO

\_\_\_\_\_  
Name of Participant  
(Please print)

\_\_\_\_\_  
Signature

\_\_\_\_\_  
Date (DD/MM/YYYY)

\_\_\_\_\_  
Researcher\*

\_\_\_\_\_  
Signature

\_\_\_\_\_  
Date (DD/MM/YYYY)

\* **Important:** Prior to signing please ensure local research contact details are complete on page 6.

Information to Research Team:

Once a Consent Form has been signed, please copy three times: One for the participant, one to file in the medical notes and fax/post/encrypted email one to CTU. Please place original in the site file.

Please fax/encrypt email/post this consent form to CTU **separately** to other anonymised trial documents (e.g. CRF).

# BMJ Open

## Protocol for DexEnceph; a randomised controlled trial of dexamethasone therapy in adults with Herpes Simplex Virus Encephalitis

|                                 |                                                                                                                                                                                                                                                                                                                                                                                                                                                                                                                                                                                                                                                                                                                                                                                                                                                                                                                                                                                                                                                                                                                                                                                                                                                                                                                                                                                                                                                                                                                                                                                                                                                                                                                                                                                                                                                                                                                                                                                                                                                                           |
|---------------------------------|---------------------------------------------------------------------------------------------------------------------------------------------------------------------------------------------------------------------------------------------------------------------------------------------------------------------------------------------------------------------------------------------------------------------------------------------------------------------------------------------------------------------------------------------------------------------------------------------------------------------------------------------------------------------------------------------------------------------------------------------------------------------------------------------------------------------------------------------------------------------------------------------------------------------------------------------------------------------------------------------------------------------------------------------------------------------------------------------------------------------------------------------------------------------------------------------------------------------------------------------------------------------------------------------------------------------------------------------------------------------------------------------------------------------------------------------------------------------------------------------------------------------------------------------------------------------------------------------------------------------------------------------------------------------------------------------------------------------------------------------------------------------------------------------------------------------------------------------------------------------------------------------------------------------------------------------------------------------------------------------------------------------------------------------------------------------------|
| Journal:                        | <i>BMJ Open</i>                                                                                                                                                                                                                                                                                                                                                                                                                                                                                                                                                                                                                                                                                                                                                                                                                                                                                                                                                                                                                                                                                                                                                                                                                                                                                                                                                                                                                                                                                                                                                                                                                                                                                                                                                                                                                                                                                                                                                                                                                                                           |
| Manuscript ID                   | bmjopen-2020-041808.R2                                                                                                                                                                                                                                                                                                                                                                                                                                                                                                                                                                                                                                                                                                                                                                                                                                                                                                                                                                                                                                                                                                                                                                                                                                                                                                                                                                                                                                                                                                                                                                                                                                                                                                                                                                                                                                                                                                                                                                                                                                                    |
| Article Type:                   | Protocol                                                                                                                                                                                                                                                                                                                                                                                                                                                                                                                                                                                                                                                                                                                                                                                                                                                                                                                                                                                                                                                                                                                                                                                                                                                                                                                                                                                                                                                                                                                                                                                                                                                                                                                                                                                                                                                                                                                                                                                                                                                                  |
| Date Submitted by the Author:   | 23-Feb-2021                                                                                                                                                                                                                                                                                                                                                                                                                                                                                                                                                                                                                                                                                                                                                                                                                                                                                                                                                                                                                                                                                                                                                                                                                                                                                                                                                                                                                                                                                                                                                                                                                                                                                                                                                                                                                                                                                                                                                                                                                                                               |
| Complete List of Authors:       | Whitfield, Thomas; University of Liverpool, Brain Infections Unit<br>Fernandez, Cristina; University of Liverpool, Brain Infections Unit<br>Davies, Kelly; University of Liverpool, Clinical Trials Research Centre<br>Defres, Sylviane; Institute of Infection and Global Health, Clinical infection, medical microbiology and Immunology; Royal Liverpool and Broadgreen University Hospitals Trust, Tropical infectious diseases Unit<br>Griffiths, Michael; University of Liverpool, Brain Infections Unit; Alder Hey Children's NHS Foundation Trust, Neurology<br>Hooper, Cory; University of Liverpool, Brain Infections Unit<br>Tangney, Rebecca; Aintree University Hospitals NHS Foundation Trust<br>Burnside, Girvan; University of Liverpool Faculty of Health and Life Sciences, Biostatistics<br>Rosala- Hallas, Anna; University of Liverpool Faculty of Health and Life Sciences, Biostatistics<br>Moore, Perry; The Walton Centre NHS Foundation Trust, Dept of Clinical Neuropsychology<br>Das, Kumar; The Walton Centre NHS Foundation Trust<br>Zuckerman, Mark; King's College Hospital NHS Foundation Trust, South London Specialist Virology Centre<br>Parkes, Laura; University of Manchester Institute of Science and Technology Department of Biomolecular Science,<br>Keller, Simon; Aintree University Hospitals NHS Foundation Trust<br>Roberts, Neil; The University of Edinburgh The Queen's Medical Research Institute<br>Easton, Ava; The Encephalitis Society<br>Touati, Saber; CHU Grenoble Alpes, Service des Maladies Infectieuses et Tropicales<br>Kneen, Rachel; Alder Hey Children's NHS Foundation Trust, Department of Neurology;; Institute of Infection and Global Health, Clinical Infection, medical microbiology and Immunology<br>Stahl, JP; Infectious Diseases Department, University of Grenoble<br>Solomon, Tom; University of Liverpool Institute of Infection and Global Health; National Institute for Health Research Health Protection Research Unit in Emerging and Zoonotic Infections, University of Liverpool |
| <b>Primary Subject Heading</b>: | Neurology                                                                                                                                                                                                                                                                                                                                                                                                                                                                                                                                                                                                                                                                                                                                                                                                                                                                                                                                                                                                                                                                                                                                                                                                                                                                                                                                                                                                                                                                                                                                                                                                                                                                                                                                                                                                                                                                                                                                                                                                                                                                 |
| Secondary Subject Heading:      | Infectious diseases, Pharmacology and therapeutics, Intensive care                                                                                                                                                                                                                                                                                                                                                                                                                                                                                                                                                                                                                                                                                                                                                                                                                                                                                                                                                                                                                                                                                                                                                                                                                                                                                                                                                                                                                                                                                                                                                                                                                                                                                                                                                                                                                                                                                                                                                                                                        |

1  
2  
3  
4  
5  
6  
7  
8  
9  
10  
11  
12  
13  
14  
15  
16  
17  
18  
19  
20  
21  
22  
23  
24  
25  
26  
27  
28  
29  
30  
31  
32  
33  
34  
35  
36  
37  
38  
39  
40  
41  
42  
43  
44  
45  
46  
47  
48  
49  
50  
51  
52  
53  
54  
55  
56  
57  
58  
59  
60

|           |                                                                                        |
|-----------|----------------------------------------------------------------------------------------|
| Keywords: | Neurology < INTERNAL MEDICINE, VIROLOGY, NEUROLOGY,<br>Neurological injury < NEUROLOGY |
|           |                                                                                        |

SCHOLARONE™  
Manuscripts



I, the Submitting Author has the right to grant and does grant on behalf of all authors of the Work (as defined in the below author licence), an exclusive licence and/or a non-exclusive licence for contributions from authors who are: i) UK Crown employees; ii) where BMJ has agreed a CC-BY licence shall apply, and/or iii) in accordance with the terms applicable for US Federal Government officers or employees acting as part of their official duties; on a worldwide, perpetual, irrevocable, royalty-free basis to BMJ Publishing Group Ltd ("BMJ") its licensees and where the relevant Journal is co-owned by BMJ to the co-owners of the Journal, to publish the Work in this journal and any other BMJ products and to exploit all rights, as set out in our [licence](#).

The Submitting Author accepts and understands that any supply made under these terms is made by BMJ to the Submitting Author unless you are acting as an employee on behalf of your employer or a postgraduate student of an affiliated institution which is paying any applicable article publishing charge ("APC") for Open Access articles. Where the Submitting Author wishes to make the Work available on an Open Access basis (and intends to pay the relevant APC), the terms of reuse of such Open Access shall be governed by a Creative Commons licence – details of these licences and which [Creative Commons](#) licence will apply to this Work are set out in our licence referred to above.

Other than as permitted in any relevant BMJ Author's Self Archiving Policies, I confirm this Work has not been accepted for publication elsewhere, is not being considered for publication elsewhere and does not duplicate material already published. I confirm all authors consent to publication of this Work and authorise the granting of this licence.

1  
2  
3  
4  
5  
6  
7  
8  
9  
10  
11  
12  
13  
14  
15  
16  
17  
18  
19  
20  
21  
22  
23  
24  
25  
26  
27  
28  
29  
30  
31  
32  
33  
34  
35  
36  
37  
38  
39  
40  
41  
42  
43  
44  
45  
46  
47  
48  
49  
50  
51  
52  
53  
54  
55  
56  
57  
58  
59  
60

1 **Protocol for DexEnceph; a randomised controlled trial of dexamethasone therapy in adults**  
2 **with Herpes Simplex Virus Encephalitis**

3 The study is funded by the National Institute for Health Research's Efficacy and Mechanism  
4 Evaluation (EME) programme.

5  
6 The trial sponsor is the University of Liverpool, who are responsible for all aspects of study  
7 design, implementation, analysis and write up (sponsor@liverpool.ac.uk).

8  
For peer review only

## 9 **Abstract**

### 10 **Introduction**

11 Herpes simplex virus (HSV) encephalitis is a severe form of brain inflammation that  
12 commonly leaves survivors and their families with devastating long-term consequences. The  
13 virus particularly targets the temporal lobe of the brain causing debilitating memory  
14 problems, especially in verbal memory. It is postulated that immunomodulation with  
15 steroids could improve outcomes by reducing brain swelling. However, there are concerns  
16 (so far not observed) that such immunosuppression might facilitate increased viral  
17 replication with resultant worsening of disease. A previous trial closed early because of slow  
18 recruitment.

### 19 **Method**

20 DexEnceph is a pragmatic multicentre, randomised, controlled, open label, observer-blind  
21 trial to determine whether adults who receive dexamethasone alongside standard  
22 treatment with aciclovir for HSV encephalitis have improved clinical outcomes compared  
23 with those who receive standard treatment alone. Overall, 90 patients with HSV  
24 encephalitis will be recruited from a target of 90 recruiting sites; patients will be  
25 randomised 1:1 to the dexamethasone or control arms of the study. The primary outcome  
26 measured is verbal memory as assessed by the Weschler Memory Scale fourth edition  
27 Auditory Memory Index at 26 weeks post randomisation. Secondary outcomes are  
28 measured up to 72 weeks include additional neuropsychological, clinical and functional  
29 outcomes as well as comparison of neuroimaging findings. Patient safety monitoring occurs  
30 throughout and includes the detection of HSV DNA in cerebrospinal fluid 2 weeks after  
31 randomisation, which is indicative of ongoing viral replication.



1  
2  
3 32 **Discussion**  
4  
5

6 33  
7  
8  
9 34 DexEnceph aims to be the first completed randomised controlled trial of steroid therapy in  
10  
11 35 HSV encephalitis. The results will provide evidence for future practice in managing adults with  
12  
13  
14 36 the condition and has the potential to improve outcomes in a life-changing disease.  
15

16  
17 37

18  
19 38 **Ethics and dissemination**  
20

21 39 The trial has ethical approval from the UK National Research Ethics committee (Liverpool  
22  
23  
24 40 Central, REF: 15/NW/0545, 10/08/2015). Protocol version 2.1 July 2019 The results will be  
25  
26 41 published and presented as soon as possible on completion.  
27  
28

29 42

30  
31 43 **Registration numbers**  
32

33  
34 44 ISRCTN11774734, EUDRACT 2015-001609-16  
35  
36

37 46

38  
39  
40 47 Key words: Herpes simplex, Encephalitis, Dexamethasone, Steroid, Verbal memory  
41

42 48  
43  
44  
45  
46  
47  
48  
49  
50  
51  
52  
53  
54  
55  
56  
57  
58  
59  
60

1  
2  
3 49 **Article Summary**

4  
5 50 **'Strengths and limitations of this study',**

6 51

7  
8 52     ▪ DexEnceph will be the first completed randomised controlled trial of steroid in herpes  
9 53     simplex virus encephalitis, examining the utility and safety of steroid use.

10  
11  
12 54

13  
14 55     ▪ DexEnceph's primary end point is verbal memory score recorded at 26 weeks post  
15 56     randomisation, this represents the most common area of the brain to be affected.

16 57

17 58

18  
19 59     ▪ The recruitment target is informed by the recent Enceph-UK programme grant of  
20 60     encephalitis in the UK; the trial is currently open and has recruited 71 patients of a  
21 61     target 90.

22  
23 62

24  
25 63     ▪ Concentration on site engagement with innovative, bespoke methods are key to  
26 64     identifying and recruiting patients to ensure trial success.

27  
28 65

29  
30 66     ▪ The pragmatic open label, observer blind design of the trial is ensuring successful  
31 67     recruitment to date.

32  
33 68

34  
35  
36  
37 69 Authors: Whitfield T,<sup>1</sup> Fernandez C,<sup>1</sup> Davies K,<sup>2</sup> Defres S<sup>1, 13, 15</sup>, Griffiths M,<sup>1, 14</sup> Hooper C,<sup>1</sup>

38  
39 70 Tangney R,<sup>3</sup> Burnside G,<sup>4</sup> Rosala-Hallas A,<sup>4</sup> Moore P,<sup>12</sup> Das K,<sup>5</sup> Zuckerman M,<sup>6</sup> Parkes L,<sup>7</sup>,

40  
41 71 Keller S,<sup>3</sup> Roberts N,<sup>8</sup> Easton A,<sup>1,9</sup> Touati S,<sup>10</sup> Kneen R,<sup>1,14</sup> JP Stahl<sup>11</sup> & Solomon T<sup>1, 5,15</sup>

42  
43  
44  
45 72

46  
47  
48 73     1. Institute of Infection and Global Health, University of Liverpool, L69 7BE, United  
49  
50  
51 74     Kingdom

52  
53 75     2. Clinical Trials Research Centre, University of Liverpool, L12 2AP, United Kingdom

54  
55 76     3. University Hospital Aintree, L9 7AL, United Kingdom

56  
57  
58 77     4. Department of Biostatistics, University of Liverpool, L69 3GL, United Kingdom

59  
60

- 1
- 2
- 3 78 5. The Walton Centre NHS Foundation Trust, L9 7JL, United Kingdom
- 4
- 5
- 6 79 6. South London Specialist Virology Centre, Kings College Hospital NHS Foundation Trust,
- 7
- 8 80 SE5 9RS, United Kingdom
- 9
- 10 81 7. Division of Neuroscience and Experimental Psychology, Faculty of Biology Medicine
- 11
- 12 and Health, University of Manchester, M13 9NT, United Kingdom
- 13 82
- 14
- 15 83 8. Queens Medical Research Institute, University of Edinburgh, EH16 4TJ, United
- 16
- 17 Kingdom
- 18 84
- 19
- 20 85 9. Encephalitis Society, Malton, North Yorkshire, YO17 7DT, United Kingdom
- 21
- 22
- 23 86 10. Département de Recherche Clinique (DRC), Grenoble Cedex, France
- 24
- 25 87 11. Infectious Diseases Department, University and Hospital Grenoble Alpes, Grenoble
- 26
- 27 Cedex, France
- 28 88
- 29
- 30 89 12. Salford Royal NHS Foundation Trust, M6 8HD, United Kingdom
- 31
- 32 90 13. Tropical Infectious diseases Unit, Royal Liverpool University Hospital, L7 8XP, United Kingdom
- 33
- 34 91 14. Alder Hey NHS Foundation Trust, Liverpool, L14 5AB, United Kingdom
- 35
- 36 92 15. NIHR Health Protection Research Unit on Emerging and Zoonotic Infections, Liverpool, L69
- 37
- 38 7BE, United Kingdom
- 39 93
- 40
- 41
- 42 94 Correspondence & trial sponsor: Tom Solomon [tsolomon@liverpool.ac.uk](mailto:tsolomon@liverpool.ac.uk)
- 43
- 44
- 45 95 HPRU Project Team, The Ronald Ross Building, University of Liverpool, 8 West Derby
- 46
- 47 Street, Liverpool, L69 7BE
- 48 96
- 49
- 50
- 51 97 Tel: 0151 795 7552
- 52
- 53
- 54 98 Fax: 0151 795 5527
- 55
- 56
- 57 99
- 58
- 59
- 60

1  
2  
3 100 Word Count : 4900 words  
4  
5

6 101  
7  
8

9 102  
10  
11

12 103  
13  
14

15 104  
16  
17

## 18 19 105 **Introduction**

20  
21  
22 106 Herpes simplex virus infection (HSV) is the most commonly identified viral cause of  
23  
24 107 encephalitis, inflammation and swelling of the brain caused by a virus or the body's immune  
25  
26 108 system, in the UK as in most western industrialised nations.<sup>1-4</sup> The incidence has been  
27  
28 109 estimated at 1 in 250,000-500,000,<sup>2</sup> with evidence this may be higher.<sup>4</sup> Although a rare  
29  
30 110 disease, HSV encephalitis has a disproportionately large impact due to its devastating long  
31  
32 111 term neuro-psychological sequelae . These can have a marked impact on the quality of life of  
33  
34 112 the patient and their family and high health economic and social costs.<sup>5,6</sup>

35  
36  
37 113 Since the introduction of the antiviral drug aciclovir in the 1970s the mortality of HSV  
38  
39 114 encephalitis has reduced from around 70% to 5.5-12%.<sup>7-9</sup> However, survivors are commonly  
40  
41 115 left with neurological impairment; less than 20% of patients are able to return to work and  
42  
43 116 48% are classed as moderate to severely disabled.<sup>10</sup> Even when obvious disabilities have not  
44  
45 117 occurred, families often report personality changes – the person they take home from  
46  
47 118 hospital is simply not the same as the one before the illness.<sup>6,11</sup>

48  
49  
50 119 HSV encephalitis can cause a broad range of cognitive impairments, but impaired memory,  
51  
52 120 especially verbal memory, is the most common and likely relates to the viral predilection for  
53  
54  
55  
56  
57  
58  
59  
60

1  
2  
3 121 the temporal lobe of the brain.<sup>12,13</sup> The verbal memory deficits manifest as difficulties  
4  
5 122 remembering names of objects and people, as well as listening to and recalling spoken  
6  
7  
8 123 information such as conversations.<sup>14,15</sup> In addition to memory problems, difficulties in  
9  
10 124 processing speed, concentration, language and executive function are also common amongst  
11  
12  
13 125 survivors of HSV encephalitis, along with fatigue, poor concentration, anxiety and  
14  
15 126 depression.<sup>7,16,17</sup>

17  
18  
19 127 The pathogenic mechanisms in HSV encephalitis are not fully understood. The evidence  
20  
21 128 suggests that in addition to direct viral pathogenesis, inflammation of the brain in response  
22  
23  
24 129 to the virus is a key component of the disease process.<sup>18–21</sup> This is supported by the  
25  
26 130 observation that in the cerebrospinal fluid (CSF), higher levels of proinflammatory  
27  
28  
29 131 chemokines, especially monocyte chemotactic protein (MCP)-1, interferon  $\gamma$  and interleukin  
30  
31 132 6 (IL-6) are associated with a worse prognosis.<sup>22,23</sup> Poor prognosis is also associated with the  
32  
33  
34 133 extent of inflammation seen on neuroimaging,<sup>24</sup> and the degree of temporal lobe swelling is  
35  
36 134 correlated with the severity of verbal memory impairment.<sup>25</sup>

37  
38  
39  
40 135 Control of the inflammation in HSV encephalitis may improve outcome, as shown in mouse  
41  
42 136 models of the disease.<sup>26–28</sup> Before the availability of aciclovir, corticosteroids were also used  
43  
44  
45 137 routinely as a treatment in humans with HSV encephalitis,<sup>29,30</sup> and more recently both  
46  
47 138 cerebral oedema on imaging and cerebrospinal fluid IL-6 levels were shown to be reduced in  
48  
49  
50 139 patients given corticosteroids.<sup>23</sup> However, because corticosteroids cause  
51  
52 140 immunosuppression which in theory facilitates increased viral replication, their role is  
53  
54 141 uncertain.<sup>31</sup>

55  
56  
57 142 In other brain infections, including bacterial meningitis and tuberculous meningitis the benefit  
58  
59  
60 143 of corticosteroids has been demonstrated in large clinical trials.<sup>32</sup> For HSV encephalitis the

1  
2  
3 144 potential benefit of using corticosteroid as an adjunct to aciclovir therapy has been suggested  
4  
5  
6 145 from small case series and retrospective comparisons, but there has been no prospective  
7  
8 146 randomised study reported.<sup>33–38</sup> One study, the German trial of Aciclovir and Corticosteroids  
9  
10 147 in Herpes simplex virus Encephalitis (the GACHE trial) was stopped early because of poor  
11  
12  
13 148 recruitment rates.<sup>39</sup> However, there is clearly a need for a study to assess this question. The  
14  
15 149 DexEnceph Study, a randomised controlled trial of dexamethasone in HSV encephalitis, aims  
16  
17  
18 150 to achieve this.  
19  
20  
21 151

## 22 23 24 152 **Trial design**

25  
26  
27 153 DexEnceph is a pragmatic, multicentre, randomised, controlled, observer-blind trial to  
28  
29  
30 154 determine whether the addition of dexamethasone to standard aciclovir treatment improves  
31  
32 155 clinical outcomes (in particular verbal memory score) for adults with HSV encephalitis.  
33  
34 156 Additionally, neuroimaging and biomarkers will be assessed along with detection of HSV in  
35  
36  
37 157 the cerebrospinal fluid at 2 weeks post randomisation to monitor for difference in viral  
38  
39 158 replication between the two groups.  
40  
41  
42 159

## 43 44 45 160 **Primary objective**

46  
47  
48 161 To determine whether a short course of intravenous dexamethasone, in addition to standard  
49  
50  
51 162 care, improves verbal memory score in adults with HSV encephalitis at 26 weeks post  
52  
53  
54 163 treatment compared to standard care alone.  
55  
56  
57 164

## 58 59 60 165 **Secondary objectives**

1  
2  
3 166 Secondary objectives include the following:  
4

5  
6 167 To determine whether dexamethasone therapy has an effect on other neuropsychological,  
7  
8 168 cognitive, clinical, disability and functional outcomes in HSV encephalitis.  
9

10  
11  
12 169 To assess the effect of dexamethasone therapy on brain swelling assessed by neuroimaging  
13  
14 170 imaging.  
15

16  
17 171 To determine whether dexamethasone therapy affects clearance of HSV from cerebrospinal  
18  
19 172 fluid, the emergence of anti-N-Methyl-D Aspartic acid (NMDA) receptor antibody or causes  
20  
21 173 any changes in transcriptomic and proteomic profiling in the CSF and blood.  
22  
23  
24

25 174

26  
27 175 A more comprehensive list of measures is detailed in the outcomes section.  
28

29  
30 176  
31

## 32 33 177 **Methods and analysis** 34

35  
36 178 DexEnceph is an observer blind, open label, prospective, randomised, controlled trial of  
37  
38 179 dexamethasone at 10mg four times daily for 4 days, versus no dexamethasone, in adults with  
39  
40 180 HSV encephalitis.  
41  
42

## 43 44 181 **Research setting** 45

46  
47 182 The trial is being conducted in up to 45 NHS trusts, with a recruitment target of 0-2 patients  
48  
49 183 per site per year. A full list of sites involved in DexEnceph can be obtained from  
50  
51 184 [www.dexenceph.org.uk](http://www.dexenceph.org.uk). The trial uses SPIRIT reporting guidelines,<sup>40</sup> (supplementary file 1).  
52  
53

## 54 55 185 **Eligibility criteria** 56

## 57 58 186 **Inclusion Criteria** 59 60

1  
2  
3 187 Enrolled patients fulfil all of the following criteria:  
4

5  
6 188

7  
8 189 1. Suspected encephalitis defined as: new onset seizure or new focal neurological signs or  
9  
10 190 alteration in consciousness, cognition, personality, or behaviour. Personality / behaviour  
11  
12 191 change includes agitation, psychosis, somnolence, insomnia, catatonia, mood lability, altered  
13  
14 192 sleep pattern.  
15  
16

17  
18 193

19  
20 194 2. A positive HSV DNA polymerase chain reaction (PCR) result from CSF, reported not more  
21  
22 195 than 7 days prior to randomisation.  
23  
24

25 196

26  
27  
28 197 3. Receiving intravenous aciclovir administered as 10mg/kg three times daily or at a reduced  
29  
30 198 dose if clinically indicated.  
31  
32

33 199

34  
35 200 4. Age  $\geq$  16 years.  
36  
37

38 201

39  
40 202 5. Written informed consent given by the patient or their legal representative<sup>41</sup>  
41  
42

43 203  
44  
45

#### 46 204 **Exclusion Criteria**

47  
48  
49 205 Patients are excluded if they have any of the following:  
50

51 206 1. Have received oral or injectable corticosteroid therapy in the 30 days prior to the day of  
52  
53 207 admission to hospital. This does not apply to topical/ inhaled corticosteroids. [Patients who  
54  
55 208 have received oral or injectable corticosteroid therapy AFTER their admission to hospital will  
56  
57 209 not be excluded from the study if they consent to trial participation].  
58  
59  
60



1  
2  
3 210  
4  
5  
6 211

2. History of hypersensitivity to corticosteroids.

7  
8 212  
9

10 213 3. Immunosuppression secondary to:

11  
12  
13 214 a. Known HIV infection and CD4 white cell count under 200/mm<sup>3</sup>

14  
15 215 b. Currently taking biologic therapy or other immunosuppressive agents [e.g.

16  
17 216 azathioprine, methotrexate, ciclosporin]

18  
19 217 c. Previous solid organ transplant and currently on immunosuppression

20  
21 218 d. Previous bone marrow transplant

22  
23 219 e. Currently undergoing a course of chemotherapy or radiotherapy

24  
25 220 f. Known primary immunodeficiency syndrome

26  
27 221 g. Known current haematological malignancy

28  
29 222

30  
31 223 4. Pre-existing indwelling ventricular devices.

32  
33 224

34  
35 225 5. Peptic ulcer disease in the last 6 months, defined as a peptic ulcer seen at endoscopy or

36  
37 226 an upper gastrointestinal bleed causing a  $\geq 2$  unit haemoglobin drop, in the last 6 months.

38  
39 227

40  
41 228 6. Antiretroviral regime containing rilpivirine as current treatment [Levels of rilpivirine are

42  
43 229 known to significantly decrease in co-administration with dexamethasone, a switch to a

44  
45 230 suitable alternative can facilitate trial entry].

46  
47 231

48  
49 232 **Intervention**

50  
51  
52  
53  
54  
55  
56  
57  
58  
59  
60

1  
2  
3 233 Participants are randomised in a 1:1 ratio to dexamethasone four times daily for four days  
4  
5  
6 234 alongside standard care, or standard care alone (Figure 1). Standard care includes intravenous  
7  
8 235 aciclovir for a minimum of 14 days based on an ideal body weight at 10mg/kg every 8 hours,  
9  
10 236 unless dose adjustment to account for renal impairment is necessary. Participating clinicians  
11  
12  
13 237 remain free to modify or discontinue the dexamethasone administration or to give alternative  
14  
15 238 treatments at any stage, if this is judged to be in the best interest of the patient.  
16  
17

18 239  
19  
20 240 Participants assigned dexamethasone receive 10 mg equivalent of ordinary ward stock,  
21  
22 241 prescribed by an authorised member of the local study team, given intravenously four times  
23  
24 242 daily for four days (16 doses in total) starting within 24 hours of randomisation.  
25  
26  
27

28 243  
29  
30 244 The University of Liverpool employs a clinical trials unit to be responsible for screening, and  
31  
32 245 monitoring data collection, quality and completeness. As there is a low number of  
33  
34 246 participants to be recruited, the trials unit are able to liaise regularly with each site following  
35  
36 247 randomisation to ensure all follow up data are collected. Primary outcome is recorded by a  
37  
38 248 centrally employed roving neuropsychologist, who collects the neuropsychological outcomes  
39  
40 249 at 26 and 72 weeks.  
41  
42  
43

44 250

45 251

46 252

47 253

48 254

49 255

50 256

1  
2  
3 257  
4  
5  
6 258  
7  
8 259  
9  
10  
11 260  
12  
13  
14 261 **Outcome measures**  
15  
16  
17 262 **Primary Outcome**  
18  
19  
20 263 Verbal memory score, determined by the Wechsler Memory Scale 4<sup>th</sup> edition (WMS-IV)  
21  
22 264 Auditory Memory Index, at 26 weeks after randomisation.  
23  
24  
25 265 **Secondary Outcomes**  
26  
27  
28 266 Other neuropsychological outcome measures [at 26 weeks and 78 weeks after  
29  
30  
31 267 randomisation]:  
32  
33 268 • Verbal memory score, determined by the WMS-IV, Auditory Memory Index, at 78  
34  
35 269 weeks after randomisation.  
36  
37  
38 270 • Visual, Immediate and Delayed Memory by Indexes of the WMS-IV, processing speed  
39  
40 271 and working memory subscales from the Wechsler Adult Intelligence Scale Fourth  
41  
42 272 Edition.  
43  
44 273 • Higher executive function using the Trail Making Test.  
45  
46 274 • Anxiety and Depression symptom levels by the Beck Depression Inventory and Beck  
47  
48 275 Anxiety Inventory.  
49  
50 276 • Subjective cognitive complaints using the Perceived Deficits Questionnaire.  
51  
52  
53 277 Cognitive Outcome Measures [at discharge or 30 days if still in hospital, 26 weeks and 78  
54  
55 278 weeks]  
56  
57  
58  
59  
60

- 1  
2  
3 279 • Addenbrooke's Cognitive Assessment III.  
4

5  
6 280 Clinical Outcomes  
7

- 8 281 • Incidence of epilepsy.  
9  
10 282 • Time to hospital discharge.  
11  
12 283 • Requirement of high dependency unit or Intensive care unit admission up to 30 days  
13  
14 284 post randomisation.  
15  
16 285 • Time taken to be free of ventilatory support for 14 days [if any].  
17  
18 286 • Time to reach maximum recorded Glasgow coma scale score.  
19  
20 287 • Survival.  
21  
22  
23  
24

25 288 Disability & Functional Outcomes [at discharge or 30 days if still in hospital, 26 weeks and 78  
26  
27 weeks]:  
28  
29

- 30 290 • Modified Rankin Score, Barthel Index, Liverpool Outcome Score and Glasgow  
31  
32 Outcome Scale Extended.  
33  
34

35 292 Imaging Outcomes: Change from Baseline at 2 weeks, 26 weeks and 78 weeks  
36  
37

- 38 293 • Temporal lobe volume (as % of intra-cranial volume).  
39  
40 294 • Whole brain volume (as % of intra-cranial volume).  
41  
42 295 • Volume of affected region as seen on fluid-attenuated inversion recovery (FLAIR)  
43  
44 image (as % of intra-cranial volume).  
45  
46 296  
47  
48 297 • Volume of affected region as seen on diffusion-weighted image (as % of intra-cranial  
49  
50 volume).  
51  
52

53 299 Biomarker Outcomes:  
54

- 55 300 • Transcriptomic and proteomic profiling on blood at convalescence (2 weeks and 26  
56  
57 weeks), compared to acute baselines, and on CSF at 2 weeks compared to acute  
58  
59 baseline.  
60

- 1  
2  
3 303       • Anti-NMDA receptor antibody testing at 26 weeks.  
4

5  
6 304 Safety Outcomes:  
7

- 8 305       • Proportion of patients with detectable HSV in CSF by PCR at 2 weeks.  
9

10  
11 306 Health Status and Quality of Life [at 26 and 78 weeks]:  
12

- 13 307       • Measured by the EuroQoL-5 Dimension-5 Level quality of life scale (EQ-5D-5L) and 36  
14  
15 308       item short form survey (SF-36) self-completed questionnaires.  
16  
17

18  
19 309

20  
21 310 **Screening**  
22

23 311 The majority of potential patients are identified by the local research team through  
24  
25 312 identifying patients with a relevant clinical presentation suspicious of HSV encephalitis and/or  
26  
27 313 detection of HSV in a CSF sample. A screening log is completed for all potential patients. A  
28  
29 314 strong link with the local laboratory is essential as a key factor in ensuring eligible patients are  
30  
31 315 not missed by the investigative team. Investigators for the local research team include  
32  
33 316 neurologists, infectious disease clinicians, microbiologist and virologists.  
34  
35  
36  
37

38 317

39  
40 318 Because this is an uncommon disease, extra measures have been taken to try and maximise  
41  
42 319 recruitment. On identifying a suitable patient, sites are able to contact the trial management  
43  
44 320 team for intensive support via a dedicated telephone hotline, email, or an app. Short videos  
45  
46 321 which explain the trial to patients, families and to health care workers also support  
47  
48 322 recruitment. Every month, the trial management group monitor the screening reports of each  
49  
50 323 site for the previous 3 months, to ensure they are actively looking for patients. Lower than  
51  
52 324 expected screening is followed up by the central study team making contact with the study  
53  
54 325 site to review their screening methodology and offer support.  
55  
56  
57  
58  
59  
60

1  
2  
3 3264  
5  
6 3277  
8 328 **Randomisation**

9  
10 329 Participants are randomised using a 24-hour secure web-based programme, which is centrally  
11  
12 330 controlled by the clinical trials research centre. Designated members of the trial team at the  
13  
14 331 site (detailed on the delegation of responsibilities log) are provided with a unique username  
15  
16 332 and password which is required to access the web-based randomisation system. In the event  
17  
18 333 of system failure, the patient can be randomised centrally electronically or through secure  
19  
20 334 envelopes. Each participant is allocated a unique study number (randomisation number), the  
21  
22 335 primary identifier for all the participants in this study.  
23  
24  
25  
26  
27  
28 336

29  
30 337 The neuropsychologist collecting the primary outcome and other outcome assessors such as  
31  
32 338 radiologists and those responsible for paper authorship are blinded to randomisation during  
33  
34 339 the trial. Trial participants and local site study teams, as well as the trial manager and trial  
35  
36 340 data manager at the clinical trials unit are aware of what treatments have been allocated. The  
37  
38 341 independent data safety and monitoring committee (IDSMC) and statisticians have access to  
39  
40 342 unblinded data grouped by intervention throughout the trial and make recommendations to  
41  
42 343 the trial's steering committee who would only become unblinded in the event of a serious  
43  
44 344 event.  
45  
46  
47  
48  
49  
50 345

51  
52 346 **Participant timeline**

53  
54  
55 347 The time schedule for enrolment, interventions and assessments is given in table 1.  
56  
57  
58 348  
59  
60

## 349 **Statistical Considerations**

350

## 351 **Sample Size**

352 The primary outcome variable is verbal memory , assessed as part of WMS-IV. In one  
353 published series of adults who survived HSV encephalitis, 19 of 22 had memory impairment  
354 evident at follow up, with verbal memory being most severely affected.<sup>12</sup> In that study the  
355 mean (standard deviation, SD) verbal memory score was 88.9 (18.9) compared with the  
356 population mean (SD) of 100.<sup>15</sup> This score can only be assessed in survivors, we estimate  
357 approximately 10% of patients in the trial will die before assessment of the primary  
358 outcome.<sup>8,42,43</sup> In instances where the death is judged to be associated with encephalitis the  
359 verbal memory score is recorded as 40, (the lowest possible value which would be obtained  
360 even where a patient recorded no recall of any of the items administered in the memory  
361 subtests). Where the cause of death is thought to be independent of having encephalitis,  
362 those patients will be recorded as lost to follow up. Similarly, for patients who are too unwell,  
363 due to encephalitis, to undergo the assessment, the score is recorded as 40. Decisions as to  
364 whether the reasons for death or non-completion of the measures were due to encephalitis  
365 will be made by an independent committee blinded to dexamethasone allocation. Adjusting  
366 the estimate of mean and standard deviation from survivors, to include the 10% of patients  
367 with the lowest possible value of 40, gives a total population mean of 84.8, with a standard  
368 deviation of 23.1. A final sample size of 36 participants per group allows us to detect a  
369 clinically meaningful difference of 15.5 on the verbal memory score with 80% power, at a two-  
370 sided significance level of 0.05. Allowing for up to 20% dropout gives an initial target sample  
371 size of 45 participants per group, for a total of 90.

372

1  
2  
3 **373 Statistical analysis**  
4

5  
6 374 For the primary outcome, participants are included in the analysis based on the intention-to-  
7  
8 375 treat principle. Verbal memory score will be compared between groups using linear  
9  
10 376 regression. The model will be adjusted for pre-specified variables which are judged to be  
11  
12  
13 377 potentially related to the outcome, including age and admission Glasgow coma scale score.  
14  
15 378 No interim analysis is planned, but there is regular monitoring by the IDSMC.  
16

17  
18 379

19  
20 380 As there may be some missing primary outcome data due to death, inability to complete the  
21  
22 381 assessment, or loss to follow up, a sensitivity analysis will be carried out. All randomised  
23  
24 382 patients will be included in this analysis.  
25

26  
27  
28 383

29  
30 384 For continuous secondary outcome variables, comparisons between groups will be analysed  
31  
32 385 as per the primary outcome. The results for residual viral presence in the CSF at 2 weeks will  
33  
34 386 be reported with a 95% confidence interval for the difference in proportions between groups.  
35  
36 387 Time to event outcomes will be analysed using Kaplan-Meier curves, log rank tests and Cox  
37  
38 388 Proportional Hazards models. Binary secondary outcomes will be analysed using logistic  
39  
40 389 regression.  
41  
42  
43  
44

45 390  
46  
47

48 **391 Trial Promotion and engagement**  
49

50  
51 392 Considerable effort is maintained to keep the principal investigators, research nurses and the  
52  
53 393 community engaged in the trial. The trial is being publicised using public forums, the  
54  
55 394 Encephalitis Society website and newsletter, social media, patient journey articles and work  
56  
57 395 with newspapers and TV. To promote site engagement, study days are arranged for research  
58  
59  
60



1  
2  
3 396 teams to attend, along with scheduled research nurse teleconferences to allow ideas on  
4  
5  
6 397 maximising recruitment and updates on trial progress to be shared. Sites are also kept  
7  
8 398 updated through our website ([www.dexenceph.org.uk](http://www.dexenceph.org.uk)), newsletters and an innovative sticker  
9  
10 399 chart, whereby a sticker is sent out to every site each time a patient is recruited (Figure 2).  
11  
12  
13 400 The Encephalitis Society are playing a key role in providing additional support to the patients  
14  
15 401 and their families aside from their work for the trial.  
16  
17

18 402

19 403

#### 20 21 22 23 24 404 **Trial Closure**

25  
26  
27 405 The end of the trial is defined to be the date on which data for all participants is frozen and  
28  
29 406 data entry privileges are withdrawn from the trial database. The trial may be closed  
30  
31 407 prematurely by the trial steering committee, on the recommendation of the IDSMC if there is  
32  
33 408 sufficient evidence of risk to patient safety.  
34  
35  
36

#### 37 409 **Pharmacovigilance**

38  
39  
40 410 Oversight of the trial is provided by the trial steering committee, which meets at least annually  
41  
42 411 to review trial progress, safety, and adverse events. The committee is also informed of any  
43  
44 412 protocol changes by the clinical trial research unit.  
45  
46  
47

48  
49 413 The Medicines for Human Use (Clinical Trials) Regulations 2004 (SI 2004/1031) definitions are  
50  
51 414 used for Adverse Event (AE), Adverse Reaction (AR), Unexpected Adverse Reaction (UAR),  
52  
53 415 Serious Adverse Event (SAE), Serious Adverse Reaction (SAR) or Suspected Unexpected  
54  
55 416 Serious Adverse Reaction (SUSAR).  
56  
57

58  
59 417 Depending on the nature of the event the reporting procedures below are followed:  
60

1  
2  
3 418 1. Serious adverse events occurring up to 30 days after randomisation are reported through  
4  
5  
6 419 a Serious Adverse Event Form (if serious) or in the 30 day/discharge case record forms (CRF)  
7  
8 420 if they are a notable event (Positive PCR in CSF at 2nd lumbar puncture, gastrointestinal bleed,  
9  
10 421 hyperglycaemia requiring change in medical management, opportunistic infections,  
11  
12 422 unexpected/severe neuropsychiatric events).

13  
14  
15  
16 423 2. Serious adverse events occurring after 30 days from randomisation are monitored through  
17  
18 424 reporting in the CRFs with safety data collected in the 26 week and 78-week CRFs if serious.

19  
20  
21 425 The research investigator at each study site (or designated other) assesses all adverse events  
22  
23 426 for seriousness, causality and severity. The Chief Investigator (or designated other) assesses  
24  
25 427 all adverse drug reactions for expectedness from known side effects of the use of  
26  
27 428 Dexamethasone.<sup>44</sup> All serious ARs, AEs and SUSARs occurring up to 30 days from  
28  
29 429 randomisation (apart from death unless the investigator suspects causality) require reporting  
30  
31 430 to the clinical trials unit, within 24 hours of the site becoming aware of the event. In the case  
32  
33 431 of death of a patient causality will be assessed by the trial steering committee.

34  
35  
36 432 The clinical trials unit will notify the Medicines and Healthcare products Regulatory Agency  
37  
38 433 and main research ethics committee of all SUSARs that occur during the study according to  
39  
40 434 the following timelines; fatal and life-threatening within 7 days of notification and non-life  
41  
42 435 threatening within 15 days. All investigators are informed of all SUSARs occurring throughout  
43  
44 436 the study.

45  
46  
47 437 SAEs occurring after 30 days from randomisation are monitored by the clinical trials unit via  
48  
49 438 the 26 week and 78week CRFs. These CRFs need to be received at the clinical trials research  
50  
51 439 unit by 4 weeks after the 26 and 6 weeks after 78week time points.  
52  
53  
54  
55  
56  
57  
58  
59  
60

1  
2  
3 440 Safety data is provided to the IDSMC, who are responsible for safeguarding the interests of  
4  
5  
6 441 trial participants and assessing the safety of the interventions during the trial; the IDSMC  
7  
8 442 ensures action is taken as needed should they become aware of trends in reported AEs that  
9  
10  
11 443 raise safety concerns.

#### 12 13 444 **Trial Funding and Financial Arrangements**

14  
15  
16 445  
17  
18 446 Contractual agreements are in place between the Sponsor and collaborating centres that  
19  
20  
21 447 describe financial arrangements. Trial participants are not paid to participate in the trial but  
22  
23  
24 448 are paid travel expenses for the follow up visits, estimated at £50 per visit. Payments to sites  
25  
26 449 are made per site initiation but the bulk of payments are made per patient recruitment. Sites  
27  
28 450 receive payment for: clinical time oversight, research nurse time, administrative support,  
29  
30  
31 451 magnetic resonance imaging scanning and pharmacy oversight.

32  
33 452

#### 34 35 453 **Patient and public involvement**

36  
37  
38 454 The Encephalitis Society was consulted and provided advice on the design of the trial and the  
39  
40  
41 455 difficulties participants and their families will likely encounter. The Chief Executive of The  
42  
43 456 Encephalitis Society is a co-applicant on the grant application and a co-author on this paper.

44  
45 457

46  
47  
48 458 The Encephalitis Society has also provided patient representatives at our trial steering  
49  
50  
51 459 committee and assisted in the production and dissemination of trial promotional materials.

52  
53 460 The Encephalitis Society will drive forward publication and dissemination of the trial findings  
54  
55  
56 461 among lay, therapeutic and health professionals through the use of web materials,  
57  
58 462 newsletters and guides as well as at conferences and seminars in relation to encephalitis and  
59  
60

1  
2  
3 463 related fields. All patients and their family/carers will be acknowledged in any outputs from  
4  
5  
6 464 the trial. We also work with The Encephalitis Society on a programme  
7  
8 465 of teaching events and produce guides for healthcare professionals and lay people.  
9  
10 466 In instances where trial participants and their families have ongoing difficulties the central  
11  
12  
13 467 study team seek help for them through the Encephalitis Society and appropriate specialists  
14  
15 468 for further assistance.  
16  
17

18 469

19  
20  
21 470

## 22 23 471 **Ethics and Dissemination**

24  
25  
26 472

27  
28 473 The trial falls within the remit of the EU Directive 2001/20/EC, transposed into UK law as the  
29  
30  
31 474 UK Statutory Instrument 2004 No 1031: Medicines for Human Use (Clinical Trials) Regulations  
32  
33  
34 475 2004 as amended. This trial is registered with the MHRA and granted Clinical Trial  
35  
36 476 Authorisation (CTA). The EUDRACT number for CTA reference is 2015-001609-16. Ethical  
37  
38  
39 477 approval has been obtained from a multi-centre research ethics committee familiar with the  
40  
41 478 principals of the Mental Capacity Act 2005 guidance for sites in England and Wales and the  
42  
43 479 Adults with Incapacity Act 2008 for sites in Scotland as the principals are relevant to a clinical  
44  
45  
46 480 trial of investigational medicinal products (CTIMP). Clinical Research Governance approval  
47  
48 481 was given through the Sponsor, The University of Liverpool. The trial protocol was approved  
49  
50  
51 482 by a National Research Ethics Service Committee reference is 2015-001609-16 (Attained  
52  
53 483 31/03/2016) and underwent independent review at the Research and Development offices  
54  
55  
56 484 at participating sites. This study abides by the principles of the World Medical Association  
57  
58 485 Declaration of Helsinki (1964) and Tokyo (1975), Venice (1983), Hong Kong (1989) and South  
59  
60

1  
2  
3 486 Africa (1996). Due to the nature of this trial it also abides by the Medicine for Human Use  
4  
5  
6 487 (Clinical Trials) regulations 2004 (S.I.2004:1031) and all following amendments which are  
7  
8 488 incorporated into UK law.  
9

10 489

### 13 490 **Informed Consent Process**

15 491

18 492 In obtaining and documenting informed consent, the investigators adhere to National  
19  
20 493 Institute for Health Research (NIHR) Good Clinical Practice (GCP) guidelines and the ethical  
21  
22  
23 494 principles derived from the Declaration of Helsinki. Staff delegated by the principal  
24  
25 495 investigator and appropriately trained with experience in obtaining informed consent, discuss  
26  
27  
28 496 the objectives, risks and inconveniences of the trial and the conditions under which it is to be  
29  
30 497 conducted with the patient or if the patient lacks capacity with a legal or professional  
31  
32  
33 498 representative. Trial information documents and points of contact for further information are  
34  
35 499 provided and the potential participants are given adequate time to consider their  
36  
37 500 decision(supplementary file 2).  
38

39  
40 501

42 502 As this is a CTIMP, the clinical trial regulations for incapacitated adults are followed  
43  
44 503 (Medicines for Human Use Clinical Trial Regulations 2004 and amendments). When a legal  
45  
46  
47 504 representative has given consent for a patient to participate in the trial and the patient  
48  
49  
50 505 subsequently regains capacity, the research team will provide the patient information sheet  
51  
52 506 and request consent from the participant. Patients are allowed to withdraw from the study  
53  
54  
55 507 at any point and may request withdrawal of their data collected until this point. Prospective  
56  
57 508 consent can also be obtained prior to a positive PCR result so participants may have adequate  
58  
59 509 time for contemplation.  
60

1  
2  
3 510  
4  
5  
6 511

As suspected encephalitis is a medical emergency, a deferred consent process is used for the collection and retention of some samples as part of routine clinical management. Using emergency deferred consent for samples involves taking additional samples of blood and CSF only if the procedure is being performed for clinical care. If deferred consent has been used, written consent is requested from either the patient or a legal representative as soon as is possible and appropriate, with samples discarded if this is declined. This approach is based on discussions with patients and the public through the Encephalitis Society.

7  
8 512  
9  
10 513  
11  
12  
13 514  
14  
15 515  
16  
17 516  
18  
19 517  
20  
21  
22  
23 518

### 519 **Data Capture Methods**

24  
25 519

Data is stored securely in line with the Data Protection Act 1998. The randomisation system, data capture form and CRF have been designed to optimally protect participant information and to maintain confidentiality. Trial data is captured at local sites using paper CRFs. These are then sent into the clinical trials research unit for data entry into the study specific database. Completed CRFs are returned to clinical trial research centre within 7 days of completion. A copy of the CRF sent over to the clinical trials research unit is retained at site. CRFs and consent forms are stored separately and securely at all times in dedicated areas of the clinical trials research unit.

26  
27 520  
28  
29 521  
30  
31 522  
32  
33 523  
34  
35 524  
36  
37 525  
38  
39 526  
40  
41 527  
42  
43 528  
44  
45 529  
46  
47 530  
48  
49 531  
50  
51 532  
52  
53 533

CRFs are checked for data quality by the clinical trials research unit in Liverpool responsible for ensuring data collection and storage.

532 Patients' anonymised and labelled neuroimaging data are put on to discs at site and sent to  
533 the clinical trials research unit; the images can also be transferred via the Image Exchange

1  
2  
3 534 Portal in an encrypted manner. The final dataset will be solely accessible to the central study  
4  
5  
6 535 team at the University of Liverpool for analysis and write up.  
7

8 536  
9

## 10 537 **Dissemination**

11  
12  
13 538

14  
15 539 The results of the DexEnceph trial will be published in a high impact journal in a timely manner  
16  
17  
18 540 to present the findings to front-line clinicians. They will be presented at the annual conference  
19  
20 541 organised by the Encephalitis Society and at other meetings. Authorship of the final papers  
21  
22 542 will be determined in accordance with the international committee of medical journal editors'  
23  
24  
25 543 guidelines. The investigators will be involved in the preparation and drafting of the  
26  
27  
28 544 manuscripts. There is no intended use of professional writers.  
29

30 545  
31

32 546  
33

34  
35 547  
36

37 548  
38

## 39 549 **Discussion**

40  
41  
42  
43 550

44  
45 551 This protocol describes the design of a randomised controlled trial to demonstrate the utility  
46  
47  
48 552 of using dexamethasone in the management of individuals with HSV encephalitis. HSV  
49  
50 553 encephalitis is a rare sporadic acute disease, and the trial has been designed to take this  
51  
52  
53 554 challenge into account, along with the practicalities of running the trial in a UK National Health  
54  
55 555 Service setting. In particular lessons were learnt from a previous similar European study, the  
56  
57 556 German trial of Aciclovir and Corticosteroids in Herpes simplex virus Encephalitis (GACHE  
58  
59  
60 557 trial), which was stopped early because of recruitment difficulties. Recruitment to the GACHE

1  
2  
3 558 trial necessitated patients had focal neurological signs of no longer than five days prior to  
4  
5  
6 559 admission, whilst DexEnceph has less stringent criteria and reflects the diverse ways in which  
7  
8 560 HSV encephalitis may present. DexEnceph has been designed to be both practical and  
9  
10  
11 561 pragmatic, in that patients must be recruited within 7 days of the PCR result becoming  
12  
13 562 available. This allows for occasions where it may take longer to get the PCR performed, and  
14  
15 563 also allows time for patients admitted to district general hospitals, which may not be study  
16  
17 564 centres, to be transferred to larger hospitals which are. DexEnceph also has the advantage in  
18  
19  
20 565 that its recruitment projections were based on preliminary data garnered from the ENCEPH-  
21  
22 566 UK NIHR program ([www.encephuk.org](http://www.encephuk.org)) and from a multicentre cohort study of encephalitis  
23  
24 567 in England, run by the Health Protection Agency (fore-runner to the Health Protection  
25  
26 568 Agency).<sup>9</sup> These two studies provided direct information on the number of HSV encephalitis  
27  
28 569 patients presenting to UK hospitals. Our choice of an open label observer-blind study, rather  
29  
30 570 than a placebo-controlled double-blind trial, avoided the logistic challenges of ensuring  
31  
32 571 blinded study drug was available across the large number of centres, necessitated by a rare  
33  
34 572 sporadic disease, which may also have been a factor in the recruitment difficulties  
35  
36 573 experienced by the GACHE trial. We are confident our robust monitoring and trial promotion  
37  
38 574 ensures the majority of eligible patients are recruited. N- methyl-D-aspartic acid (NMDA)  
39  
40 575 receptor antibody encephalitis (which is treated with corticosteroids and other  
41  
42 576 immunomodulatory therapies) is being recognised increasingly as a late complication of HSV  
43  
44 577 encephalitis.<sup>45,46</sup> DexEnceph may also be able examine whether corticosteroids reduce the  
45  
46 578 incidence of this complication. If there is demonstrable efficacy of corticosteroid in improving  
47  
48 579 neuropsychological, imaging and quality of life outcomes, without compromising patient  
49  
50 580 safety the results will be far reaching.  
51  
52  
53  
54  
55  
56  
57  
58  
59  
60



1  
2  
3 581  
4  
56 582 **Collaboration with France**  
7  
8

9 583 Because we recognised from the start that there may be difficulties keeping to recruitment  
10 584 targets in the DexEnceph study, we worked with colleagues in France to develop a parallel  
11  
12 585 French study (DexEnceph-France). This follows the UK DexEnceph protocol as closely as  
13  
14  
15  
16 586 possible, whilst being pragmatic about the constraints of a different country's health care  
17  
18 587 system. The French trial is based in 10 hospitals with the lead centre being Grenoble Alpes  
19  
20  
21 588 University Hospital and the aim of recruiting 30 patients.

22  
23  
24 589 The intention is for the two trials to be analysed separately, with the option of also results  
25  
26 590 also combining them into an overall analysis which will give additional power to detect a  
27  
28 591 treatment effect.  
29  
30  
31  
32

33 592

34 593

35 594

36 595

37  
38  
39  
40 596 **Trial status**  
41

42  
43 597 The trial has been open across the UK since August 2016, and as of July 2019 is open at 45  
44  
45 598 NHS trusts; 71 patients have been randomised (of the total target of 90) meaning that we  
46  
47 599 have recruited 79% of the patients are recruiting at just over 80% of the target recruitment  
48  
49 600 rate. The trial was due to complete recruitment later in 2020 with 6 months follow up and 3  
50  
51 601 months post trial closure for write up. Though recent COVID-19 pandemic has placed  
52  
53 602 difficulties in conducting trials and paused recruitment, the primary outcome has not been  
54  
55  
56 603 missed in any existing DexEnceph recruit, this has been achieved by conducting  
57  
58  
59  
60

1  
2  
3 604 neuropsychology assessment by either telephone or online video discussion, thus avoiding  
4  
5  
6 605 any risk of transmission. DexEnceph-France study, which opened in 2018 has recruited 10  
7  
8 606 patients from 10 sites.  
9

10  
11 607

12  
13 608 If you are interested to find out more information or to see if your trust is involved visit  
14  
15 609 [www.dexenceph.org.uk](http://www.dexenceph.org.uk) or for more information please email: [dexenceph@liverpool.ac.uk](mailto:dexenceph@liverpool.ac.uk).  
16

17  
18 610

19  
20 611

21  
22 612

23  
24 613

25  
26 614

27  
28  
29  
30 615 **References**  
31

32  
33 616

- 34  
35 617 1. Davison KL, Crowcroft NS, Ramsay ME, Brown DWG, Andrews NJ. Viral encephalitis in  
36  
37 618 England, 1989-1998: What did we miss? *Emerg Infect Dis*. 2003;9(2):234-240.  
38  
39 619 doi:10.3201/eid0902.020218  
40  
41  
42 620 2. Whitley RJ. Herpes simplex encephalitis: Adolescents and adults. *Antiviral Res*.  
43  
44 621 2006;71(2-3 SPEC. ISS.):141-148. doi:10.1016/j.antiviral.2006.04.002  
45  
46  
47 622 3. Mailles A, Stahl J. Infectious Encephalitis in France in 2007: A National Prospective  
48  
49 623 Study. *Clin Infect Dis*. 2009;49(12):1838-1847. doi:10.1086/648419  
50  
51  
52 624 4. Granerod J, Cousens S, Davies NWS, Crowcroft NS, Thomas SL. New estimates of  
53  
54 625 incidence of encephalitis in England. *Emerg Infect Dis*. 2013;19(9):1455-1462.  
55  
56 626 doi:10.3201/eid1909.130064  
57  
58  
59 627 5. Solomon T, Hart IJ, Beeching NJ, Solomon T, Hart IJ, Beeching NJ. Viral encephalitis : a

- 1  
2  
3 628 clinician ' s guide. 2007;(October):288-305. doi:10.1136/jnnp.2007.129098  
4  
5  
6 629 6. Easton A. Encephalitis: raising awareness and collaborating in research. *Lancet*  
7  
8 630 *Neurol.* 2016;15(4):353. doi:10.1016/s1474-4422(16)00059-4  
9  
10 631 7. Mcgrath N, Anderson NE, Croxson MC, Powell KF. Herpes simplex encephalitis treated  
11  
12 with acyclovir: diagnosis and long term outcome. *J Neurol Neurosurg Psychiatry.*  
13 632  
14 633 1997;63:321-326. doi:10.1136/jnnp.63.3.321  
15  
16  
17 634 8. Jouan Y, Grammatico-Guillon L, Espitalier F, Cazals X, François P, Guillon A. Long-term  
18  
19 outcome of severe herpes simplex encephalitis: a population-based observational  
20 635  
21 study. *Crit Care.* 2015;19(1):345. doi:10.1186/s13054-015-1046-y  
22 636  
23  
24 637 9. Granerod J, Ambrose HE, Davies NWS, et al. Causes of encephalitis and differences in  
25  
26 their clinical presentations in England: A multicentre, population-based prospective  
27 638  
28 study. *Lancet Infect Dis.* 2010;10(12):835-844. doi:10.1016/S1473-3099(10)70222-X  
29 639  
30  
31 640 10. Raschilas F, Wolff M, Delatour F, et al. Outcome of and Prognostic Factors for Herpes  
32  
33 Simplex Encephalitis in Adult Patients: Results of a Multicenter Study. *Clin Infect Dis.*  
34 641  
35 2002;35(3):254-260. doi:10.1086/341405  
36 642  
37  
38 643 11. Egdell R, Egdell D, Solomon T. Herpes simplex virus encephalitis. *Bmj.* 2012;344(jun13  
39  
40 644 2):e3630-e3630. doi:10.1136/bmj.e3630  
41  
42  
43 645 12. Utley TF, Ogden JA, Gibb A, McGrath N, Anderson NE. The long-term  
44  
45 neuropsychological outcome of herpes simplex encephalitis in a series of unselected  
46 646  
47 survivors. *Neuropsychiatry Neuropsychol Behav Neurol.* 1997;10(3):180-189.  
48 647  
49 <http://www.ncbi.nlm.nih.gov/pubmed/9297711>.  
50 648  
51  
52 649 13. Frisch S, Thiel F, Marschhauser A, Villringer A, Horstmann A, Schroeter ML. Identifying  
53  
54 neural correlates of memory and language disturbances in herpes simplex  
55 650  
56 encephalitis: a voxel-based morphometry (VBM) study. *J Neurol.* 2015;262(3):563-  
57 651  
58  
59  
60

- 1  
2  
3 652 569. doi:10.1007/s00415-014-7604-4  
4  
5  
6 653 14. Pewter SM, Williams WH, Haslam C, Kay JM. Neuropsychological and psychiatric  
7  
8 654 profiles in acute encephalitis in adults. *Neuropsychol Rehabil.* 2007;17(4-5):478-505.  
9  
10 655 doi:10.1080/09602010701202238  
11  
12  
13 656 15. Hokkanen L, Poutiainen E, Valanne L, et al. Cognitive impairment after acute  
14  
15 657 encephalitis: comparison of herpes simplex and other aetiologies. *Neurosurgery, and*  
16  
17 658 *Psychiatry.* 1996;61(December 1994):478-484. doi:10.1136/jnnp.61.5.478  
18  
19  
20 659 16. Cooper J, Kierans C, Defres S, Easton A, Kneen R, Solomon T. Care beyond the hospital  
21  
22 660 ward: understanding the socio-medical trajectory of herpes simplex virus  
23  
24 661 encephalitis. *BMC Health Serv Res.* 2017;17(1):1-11. doi:10.1186/s12913-017-2608-2  
25  
26  
27 662 17. Cooper J, Kierans C, Defres S, Easton A, Kneen R, Solomon T. Diagnostic pathways as  
28  
29 663 social and participatory practices: The case of herpes simplex encephalitis. *PLoS One.*  
30  
31 664 2016;11(3):1-15. doi:10.1371/journal.pone.0151145  
32  
33  
34 665 18. Aurelius E, Andersson B, Forsgren M, Sköldenberg B, Strannegård. Cytokines and  
35  
36 666 other markers of intrathecal immune response in patients with herpes simplex  
37  
38 667 encephalitis. *J Infect Dis.* 1994;170(3):678-681. doi:10.1093/infdis/170.3.678  
39  
40  
41 668 19. Sköldenberg B, Aurelius E, Hjalmarsson A, et al. Incidence and pathogenesis of clinical  
42  
43 669 relapse after herpes simplex encephalitis in adults. *J Neurol.* 2006;253(2):163-170.  
44  
45 670 doi:10.1007/s00415-005-0941-6  
46  
47  
48 671 20. Michael BD, Griffiths MJ, Granerod J, et al. Characteristic Cytokine and Chemokine  
49  
50 672 Profiles in Encephalitis of Infectious, Immune-Mediated, and Unknown Aetiology.  
51  
52 673 *PLoS One.* 2016;11(1):e0146288. doi:10.1371/journal.pone.0146288  
53  
54  
55 674 21. Wnęk M, Ressel L, Ricci E, et al. Herpes simplex encephalitis is linked with selective  
56  
57 675 mitochondrial damage; a post-mortem and in vitro study. *Acta Neuropathol.*

- 1  
2  
3 676 2016;132(3):433-451. doi:10.1007/s00401-016-1597-2  
4  
5  
6 677 22. Rösler A, Pohl M, Braune HJ, Oertel WH, Gemsa D, Sprenger H. Time course of  
7  
8 678 chemokines in the cerebrospinal fluid and serum during herpes simplex type 1  
9  
10 679 encephalitis. *J Neurol Sci.* 1998;157(1):82-89. doi:10.1016/S0022-510X(98)00061-6  
11  
12  
13 680 23. Kamei S, Taira N, Ishihara M, et al. Prognostic value of cerebrospinal fluid cytokine  
14  
15 681 changes in herpes simplex virus encephalitis. *Cytokine.* 2009;46(2):187-193.  
16  
17 682 doi:10.1016/j.cyto.2009.01.004  
18  
19  
20 683 24. Taira N, Kamei S, Morita a, et al. Predictors of a prolonged clinical course in adult  
21  
22 684 patients with herpes simplex virus encephalitis. *Intern Med.* 2009;48(2):89-94.  
23  
24 685 doi:10.2169/internalmedicine.48.1445  
25  
26  
27 686 25. Kapur N, Barker S, Burrows EH, et al. Herpes simplex encephalitis: long term magnetic  
28  
29 687 resonance imaging and neuropsychological profile. *Neurol Neurosurg Psychiatry.*  
30  
31 688 1994;5757:1334-1342. doi:10.1136/jnnp.57.11.1334  
32  
33  
34 689 26. Meyding-Lamadé UK, Oberlinner C, Rau PR, et al. Experimental herpes simplex virus  
35  
36 690 encephalitis: a combination therapy of acyclovir and glucocorticoids reduces long-  
37  
38 691 term magnetic resonance imaging abnormalities. *J Neurovirol.* 2003;9(1):118-125.  
39  
40 692 doi:10.1080/13550280390173373  
41  
42  
43 693 27. Sellner J, Dvorak F, Zhou Y, et al. Acute and long-term alteration of chemokine mRNA  
44  
45 694 expression after anti-viral and anti-inflammatory treatment in herpes simplex virus  
46  
47 695 encephalitis. *Neurosci Lett.* 2005;374(3):197-202. doi:10.1016/j.neulet.2004.10.054  
48  
49  
50 696 28. Meyding-lamade U, Seyfer S, Dvorak F, et al. Experimental herpes simplex virus  
51  
52 697 encephalitis: inhibition of the expression of inducible nitric oxide synthase in mouse  
53  
54 698 brain tissue. *Neurosci Lett.* 2002;318:21-24.  
55  
56  
57 699 29. Upton AR., Barwick D., Foster J. DEXAMETHASONE TREATMENT IN HERPES-SIMPLEX  
58  
59  
60

- 1  
2  
3 700 ENCEPHALITIS. *Lancet*. 1971;297(7693):290-291. doi:10.1016/S0140-6736(71)91019-1  
4  
5  
6 701 30. Habel AH, Brown JK. DEXAMETHASONE IN HERPES-SIMPLEX ENCEPHALITIS. *Lancet*.  
7  
8 702 1972;299(7752):695. doi:10.1016/S0140-6736(72)90505-3  
9  
10  
11 703 31. Defres S, Keller SS, Das K, et al. A feasibility study of quantifying longitudinal brain  
12  
13 704 changes in herpes simplex virus (HSV) encephalitis using magnetic resonance imaging  
14  
15 705 (MRI) and stereology. *PLoS One*. 2017;12(1):1-15. doi:10.1371/journal.pone.0170215  
16  
17  
18 706 32. de Gans J, van de Beek D. Dexamethasone in Adults with Bacterial Meningitis. *N Engl J*  
19  
20 707 *Med*. 2002;347(20):1549-1556. doi:10.1056/NEJMoa021334  
21  
22  
23 708 33. Kamei S. Evaluation of combination therapy using aciclovir and corticosteroid in adult  
24  
25 709 patients with herpes simplex virus encephalitis. *J Neurol Neurosurg Psychiatry*.  
26  
27 710 2005;76(11):1544-1549. doi:10.1136/jnnp.2004.049676  
28  
29  
30 711 34. Musallam B, Matoth I, Wolf DG, Engelhard D, Averbuch D. Steroids for Deteriorating  
31  
32 712 Herpes Simplex Virus Encephalitis. *Pediatr Neurol*. 2007;37(3):229-232.  
33  
34  
35 713 doi:10.1016/j.pediatrneurol.2007.05.007  
36  
37  
38 714 35. Maraş Genç H, Uyur Yalçın E, Sayan M, et al. Clinical outcomes in children with herpes  
39  
40 715 simplex encephalitis receiving steroid therapy. *J Clin Virol*. 2016;80:87-92.  
41  
42 716 doi:10.1016/j.jcv.2016.05.002  
43  
44  
45 717 36. Nakano A, Yamasaki R, Miyazaki S, Horiuchi N, Kunishige M, Mitsui T. Beneficial effect  
46  
47 718 of steroid pulse therapy on acute viral encephalitis. *Eur Neurol*. 2003;50(4):225-229.  
48  
49 719 doi:10.1159/000073864  
50  
51  
52 720 37. Lizarraga KJ, Alexandre LC, Ramos-Estebanez C, Merenda A. Are steroids a beneficial  
53  
54 721 adjunctive therapy in the immunosuppressed patient with herpes simplex virus  
55  
56 722 encephalitis? *Case Rep Neurol*. 2013;5(1):52-55. doi:10.1159/000350572  
57  
58  
59 723 38. Mesker AJ, Bon GG, de Gans J, de Kruijk JR. Case report: a pregnant woman with  
60

- 1  
2  
3 724 herpes simplex encephalitis successfully treated with dexamethasone. *Eur J Obstet*  
4  
5  
6 725 *Gynecol Reprod Biol.* 2011;154(2):231-232. doi:10.1016/j.ejogrb.2010.10.014  
7  
8 726 39. Martinez-Torres F, Menon S, Pritsch M, et al. Protocol for German trial of Acyclovir  
9  
10 727 and corticosteroids in Herpes-simplex-virus-encephalitis (GACHE): a multicenter,  
11  
12 728 multinational, randomized, double-blind, placebo-controlled German, Austrian and  
13  
14 729 Dutch trial [ISRCTN45122933]. *BMC Neurol.* 2008;8:40. doi:10.1186/1471-2377-8-40  
15  
16  
17 730 40. Hro A, Mann H, Dickersin K, et al. Research and Reporting Methods Annals of Internal  
18  
19 731 Medicine SPIRIT 2013 Statement : Defining Standard Protocol Items for Clinical Trials.  
20  
21 732 *Ann Intern Med.* 2015;1(3):200-207. doi:10.7326/0003-4819-158-3-201302050-  
22  
23 733 00583.Requests  
24  
25  
26 734 41. The Medicines for Human Use (Clinical Trials) Regulations 2004.  
27  
28 735 <http://www.legislation.gov.uk/ukxi/2004/1031/schedule/1/made>. Accessed June 19,  
29  
30 736 2019.  
31  
32  
33 737 42. Whitley RJ, Alford CA, Hirsch MS, et al. Vidarabine versus Acyclovir Therapy in Herpes  
34  
35 738 Simplex Encephalitis. *N Engl J Med.* 1986;314(3):144-149.  
36  
37 739 doi:10.1056/NEJM198601163140303  
38  
39  
40 740 43. Sköldenberg B, Alestig K, Burman L, et al. ACYCLOVIR VERSUS VIDARABINE IN HERPES  
41  
42 741 SIMPLEX ENCEPHALITIS. *Lancet.* 1984;324(8405):707-711. doi:10.1016/S0140-  
43  
44 742 6736(84)92623-0  
45  
46  
47 743 44. Spc. Dexamethasone SPC. 2014;(June):1-4.  
48  
49  
50 744 45. Gilbert GJ, Leypoldt F, Dalmau J. Herpes simplex virus-1 encephalitis can trigger anti-  
51  
52 745 NMDA receptor encephalitis: Case report. *Neurology.* 2014;82(22):2041-2041.  
53  
54 746 doi:10.1212/01.wnl.0000450946.75616.32  
55  
56  
57 747 46. Leypoldt F, Titulaer MJ, Aguilar E, et al. Herpes simplex virus-1 encephalitis can trigger  
58  
59  
60

1  
2  
3 748 anti-NMDA receptor encephalitis: Case report. *Neurology*. 2013;81(18):1637-1639.

4  
5 749 doi:10.1212/WNL.0b013e3182a9f531

6  
7  
8 750

9  
10  
11 751 **Authors' Contributions**

12  
13  
14 752 All authors were consulted and inputted into the article, below lists the particular role

15  
16 753 within DexEnceph

17  
18 754 TW: Clinical research fellow, CF: Clinical research fellow, KD: trials manager, SD: contributor to trial

19  
20 755 design and running, MG: Clinical and laboratory biomarkers lead, CH: Neuropsychology researcher,

21  
22 756 RT: Trial pharmacist, GB: Trial statistician, AR-H: trial statistician, PM: Neuropsychology lead, KDAs:

23  
24 757 Neuroimaging lead, MZ: Virology, LP: Neuroimaging, SK: Neuroimaging, NR: Neuroimaging, EA:

25  
26 758 Encephalitis Society Chief Executive advisor, ST: Study co-ordinator France, RK: Clinical lead brain

27  
28 759 infections UK, JPS: Principle investigator France, TS: Chief Investigator responsible for the trial

29  
30 760

31  
32  
33  
34  
35 761 **Trial Funding statement**

36  
37 762 This trial is funded by the NIHR Efficacy and Mechanism Evaluation Programme for the

38  
39 763 Department of Health reference 12/205/28.

40  
41 764

42  
43  
44  
45 765 **Declaration of Interests**

46  
47 766 TS is supported by the National Institute for Health Research (NIHR) Health Protection

48  
49 767 Research Unit in Emerging and Zoonotic Infections (Grant No. IS-HPU-1112-10117), NIHR

50  
51 768 Global Health Research Group on Brain Infections (No. 17/63/110), and the European Union's

52  
53 769 Horizon 2020 research and innovation program ZikaPLAN (Preparedness Latin America

54  
55 770 Network), grant agreement No. 734584.



771 Other authors: non declared

772

773 **Data Statement**

774 There are currently no current plans to publish the data, data is available on reasonable request.

775

776 **Word count:** 4900 words

777 **Figure Legends**

778

779 **Figure 1: Schematic design of DexEnceph randomised controlled trial**

780 **Figure 2 : DexEnceph Recruitment poster**

781 **Supplementary file 1: DexEnceph SPIRIT checklist**

782 **Supplementary file 2: DexEnceph Information and Consent form**

783 **Table 1: Time scale for patients Randomised in the DexEnceph study**

784

| Procedures                         | Follow-up Schedule |          |         |                                                        |          |          |                           |
|------------------------------------|--------------------|----------|---------|--------------------------------------------------------|----------|----------|---------------------------|
|                                    | Screening          | Baseline | 2 weeks | Discharge or Day 30 of admission (whichever is sooner) | 26 weeks | 78 weeks | Premature Discontinuation |
| Signed Consent Form                | X†                 | X*       |         |                                                        |          |          |                           |
| Assessment of Eligibility Criteria | X                  | X*       |         |                                                        |          |          |                           |
| Review of Medical History          |                    | X*       |         |                                                        |          |          |                           |
| Review of Concomitant Medications  |                    | X*       | X       | X                                                      | X        | X        | X                         |
| Physical Exam                      |                    | X        |         | X                                                      |          |          |                           |
| Study Intervention                 |                    | X        |         |                                                        |          |          |                           |
| Clinical Data Collection           |                    | X        |         | X                                                      | X        | X        |                           |

| Procedures                                       | Follow-up Schedule |                  |                |                                                        |          |          |                           |
|--------------------------------------------------|--------------------|------------------|----------------|--------------------------------------------------------|----------|----------|---------------------------|
|                                                  | Screening          | Baseline         | 2 weeks        | Discharge or Day 30 of admission (whichever is sooner) | 26 weeks | 78 weeks | Premature Discontinuation |
| Magnetic resonance imaging (MRI) scan            |                    | X <sub>μ</sub>   | X              |                                                        | X        | X        |                           |
| Research Blood Testing                           |                    | X                | X              |                                                        | X        |          |                           |
| Lumbar Puncture                                  |                    | X <sub>γ</sub>   | X              |                                                        |          |          |                           |
| Disability & Functional Outcomes                 |                    |                  |                | X                                                      | X        | X        |                           |
| Glasgow Coma Scale                               |                    | X <sub>∞</sub> * | X <sub>∞</sub> | X <sub>∞</sub>                                         | X        | X        |                           |
| Addenbrooke's Cognitive Examination revised      |                    |                  |                | X                                                      | X        | X        |                           |
| Neuropsychology assessment                       |                    |                  |                |                                                        | X        | X        |                           |
| Health Status and quality of life questionnaires |                    |                  |                |                                                        | X        | X        |                           |
| Clinical Laboratory: Haematology, Biochemistry   |                    | X <sub>α</sub>   |                |                                                        |          |          |                           |
| Assessment of Adverse Events                     |                    |                  | (X)            | (X)                                                    | (X)      | (X)      | (X)                       |

† Only applicable when patients are prospectively consented for the randomised controlled trial

\*Procedures required before randomisation.

μ Baseline MRI done for clinical purposes can be done from hospital admission up to 7 days after randomisation

γ Diagnostic lumbar puncture for clinical purposes done prior to randomisation

α Recording of clinical laboratory tests done for clinical purposes, NOT as part of trial

∞ Recorded prior to randomisation, daily for the first 14 days and then weekly until Discharge/30 days (whichever sooner)

(X) – As indicated/appropriate

1  
2  
3  
4  
5  
6  
7  
8  
9  
10  
11  
12  
13  
14  
15  
16  
17  
18  
19  
20  
21  
22  
23  
24  
25  
26  
27  
28  
29  
30  
31  
32  
33  
34  
35  
36  
37  
38  
39  
40  
41  
42  
43  
44  
45  
46  
47  
48  
49  
50  
51  
52  
53  
54  
55  
56  
57  
58  
59  
60

801

802

For peer review only

Figure 1: Schematic Design of DexEnceph randomised controlled trial



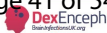

1  
2  
3  
4  
5  
6  
7  
8  
9  
10  
11  
12  
13  
14  
15  
16  
17  
18

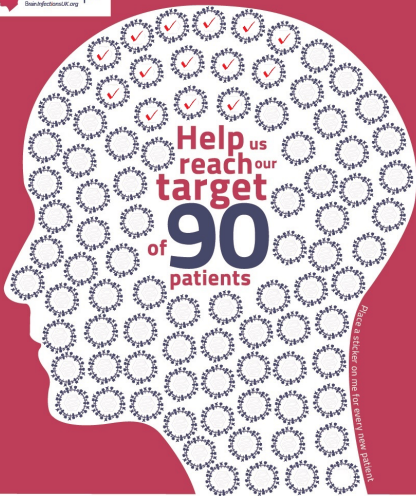

Help us  
reach our  
target  
of **90**  
patients

Place a sticker on me for every new patient

15 <http://bmiopen.com/2015/01/01/dexamethasone-in-herpes-simplex-virus-encephalitis/>

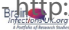

National Institute for Health Research

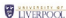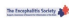

A Randomised Controlled Trial  
**Dexamethasone**  
in Herpes Simplex Virus Encephalitis

Hotline 0300 008 0007  
Landline 0151 794 9767

[dexenceph.org.uk](http://dexenceph.org.uk)  
dexenceph@liverpool.ac.uk

# SPIRIT checklist for protocol of the DexEnceph clinical trial.

|                                                         | Reporting Item                                                                                                                                                                                                                                                                                               | Page Number |
|---------------------------------------------------------|--------------------------------------------------------------------------------------------------------------------------------------------------------------------------------------------------------------------------------------------------------------------------------------------------------------|-------------|
| <b>Administrative information</b>                       |                                                                                                                                                                                                                                                                                                              |             |
| Title                                                   | <a href="#">#1</a> Descriptive title identifying the study design, population, interventions, and, if applicable, trial acronym                                                                                                                                                                              | 1           |
| Trial registration                                      | <a href="#">#2a</a> Trial identifier and registry name. If not yet registered, name of intended registry                                                                                                                                                                                                     | 3           |
| Trial registration: data set                            | <a href="#">#2b</a> All items from the World Health Organization Trial Registration Data Set                                                                                                                                                                                                                 | 3           |
| Protocol version                                        | <a href="#">#3</a> Date and version identifier                                                                                                                                                                                                                                                               | 3           |
| Funding                                                 | <a href="#">#4</a> Sources and types of financial, material, and other support                                                                                                                                                                                                                               | 34          |
| Roles and responsibilities: contributorship             | <a href="#">#5a</a> Names, affiliations, and roles of protocol contributors                                                                                                                                                                                                                                  | 4-5         |
| Roles and responsibilities: sponsor contact information | <a href="#">#5b</a> Name and contact information for the trial sponsor                                                                                                                                                                                                                                       | 1, 5        |
| Roles and responsibilities: sponsor and funder          | <a href="#">#5c</a> Role of study sponsor and funders, if any, in study design; collection, management, analysis, and interpretation of data; writing of the report; and the decision to submit the report for publication, including whether they will have ultimate authority over any of these activities | 33-34       |

|    |                           |                      |                                                              |       |
|----|---------------------------|----------------------|--------------------------------------------------------------|-------|
| 1  | Roles and                 | <a href="#">#5d</a>  | Composition, roles, and responsibilities of the              | 19-21 |
| 2  | responsibilities:         |                      | coordinating centre, steering committee, endpoint            |       |
| 3  | committees                |                      | adjudication committee, data management team, and            |       |
| 4  |                           |                      | other individuals or groups overseeing the trial, if         |       |
| 5  |                           |                      | applicable (see Item 21a for data monitoring committee)      |       |
| 6  |                           |                      |                                                              |       |
| 7  |                           |                      |                                                              |       |
| 8  |                           |                      |                                                              |       |
| 9  | <b>Introduction</b>       |                      |                                                              |       |
| 10 |                           |                      |                                                              |       |
| 11 |                           |                      |                                                              |       |
| 12 | Background and            | <a href="#">#6a</a>  | Description of research question and justification for       | 6-9   |
| 13 | rationale                 |                      | undertaking the trial, including summary of relevant         |       |
| 14 |                           |                      | studies (published and unpublished) examining benefits       |       |
| 15 |                           |                      | and harms for each intervention                              |       |
| 16 |                           |                      |                                                              |       |
| 17 |                           |                      |                                                              |       |
| 18 |                           |                      |                                                              |       |
| 19 | Background and            | <a href="#">#6b</a>  | Explanation for choice of comparators                        | 6-9   |
| 20 | rationale: choice of      |                      |                                                              |       |
| 21 | comparators               |                      |                                                              |       |
| 22 |                           |                      |                                                              |       |
| 23 |                           |                      |                                                              |       |
| 24 | Objectives                | <a href="#">#7</a>   | Specific objectives or hypotheses                            | 8-9   |
| 25 |                           |                      |                                                              |       |
| 26 |                           |                      |                                                              |       |
| 27 | Trial design              | <a href="#">#8</a>   | Description of trial design including type of trial (eg,     | 8     |
| 28 |                           |                      | parallel group, crossover, factorial, single group),         |       |
| 29 |                           |                      | allocation ratio, and framework (eg, superiority,            |       |
| 30 |                           |                      | equivalence, non-inferiority, exploratory)                   |       |
| 31 |                           |                      |                                                              |       |
| 32 |                           |                      |                                                              |       |
| 33 |                           |                      |                                                              |       |
| 34 | <b>Methods:</b>           |                      |                                                              |       |
| 35 | <b>Participants,</b>      |                      |                                                              |       |
| 36 | <b>interventions, and</b> |                      |                                                              |       |
| 37 | <b>outcomes</b>           |                      |                                                              |       |
| 38 |                           |                      |                                                              |       |
| 39 |                           |                      |                                                              |       |
| 40 |                           |                      |                                                              |       |
| 41 | Study setting             | <a href="#">#9</a>   | Description of study settings (eg, community clinic,         | 9     |
| 42 |                           |                      | academic hospital) and list of countries where data will     |       |
| 43 |                           |                      | be collected. Reference to where list of study sites can     |       |
| 44 |                           |                      | be obtained                                                  |       |
| 45 |                           |                      |                                                              |       |
| 46 |                           |                      |                                                              |       |
| 47 |                           |                      |                                                              |       |
| 48 | Eligibility criteria      | <a href="#">#10</a>  | Inclusion and exclusion criteria for participants. If        | 9-11  |
| 49 |                           |                      | applicable, eligibility criteria for study centres and       |       |
| 50 |                           |                      | individuals who will perform the interventions (eg,          |       |
| 51 |                           |                      | surgeons, psychotherapists)                                  |       |
| 52 |                           |                      |                                                              |       |
| 53 |                           |                      |                                                              |       |
| 54 |                           |                      |                                                              |       |
| 55 | Interventions:            | <a href="#">#11a</a> | Interventions for each group with sufficient detail to allow | 11-12 |
| 56 | description               |                      | replication, including how and when they will be             |       |
| 57 |                           |                      | administered                                                 |       |
| 58 |                           |                      |                                                              |       |
| 59 |                           |                      |                                                              |       |
| 60 |                           |                      |                                                              |       |

|    |                           |                      |                                                            |            |
|----|---------------------------|----------------------|------------------------------------------------------------|------------|
| 1  | Interventions:            | <a href="#">#11b</a> | Criteria for discontinuing or modifying allocated          | 11-12, 20- |
| 2  | modifications             |                      | interventions for a given trial participant (eg, drug dose | 21         |
| 3  |                           |                      | change in response to harms, participant request, or       |            |
| 4  |                           |                      | improving / worsening disease)                             |            |
| 5  |                           |                      |                                                            |            |
| 6  |                           |                      |                                                            |            |
| 7  |                           |                      |                                                            |            |
| 8  | Interventions:            | <a href="#">#11c</a> | Strategies to improve adherence to intervention            | 12, 18,    |
| 9  | adherence                 |                      | protocols, and any procedures for monitoring adherence     |            |
| 10 |                           |                      | (eg, drug tablet return; laboratory tests)                 |            |
| 11 |                           |                      |                                                            |            |
| 12 |                           |                      |                                                            |            |
| 13 | Interventions:            | <a href="#">#11d</a> | Relevant concomitant care and interventions that are       | 11-12      |
| 14 | concomitant care          |                      | permitted or prohibited during the trial                   |            |
| 15 |                           |                      |                                                            |            |
| 16 |                           |                      |                                                            |            |
| 17 | Outcomes                  | <a href="#">#12</a>  | Primary, secondary, and other outcomes, including the      | 13-15      |
| 18 |                           |                      | specific measurement variable (eg, systolic blood          |            |
| 19 |                           |                      | pressure), analysis metric (eg, change from baseline,      |            |
| 20 |                           |                      | final value, time to event), method of aggregation (eg,    |            |
| 21 |                           |                      | median, proportion), and time point for each outcome.      |            |
| 22 |                           |                      | Explanation of the clinical relevance of chosen efficacy   |            |
| 23 |                           |                      | and harm outcomes is strongly recommended                  |            |
| 24 |                           |                      |                                                            |            |
| 25 |                           |                      |                                                            |            |
| 26 |                           |                      |                                                            |            |
| 27 |                           |                      |                                                            |            |
| 28 |                           |                      |                                                            |            |
| 29 | Participant timeline      | <a href="#">#13</a>  | Time schedule of enrolment, interventions (including any   | Figure 1,  |
| 30 |                           |                      | run-ins and washouts), assessments, and visits for         | Table 1    |
| 31 |                           |                      | participants. A schematic diagram is highly                |            |
| 32 |                           |                      | recommended (see Figure)                                   |            |
| 33 |                           |                      |                                                            |            |
| 34 |                           |                      |                                                            |            |
| 35 |                           |                      |                                                            |            |
| 36 | Sample size               | <a href="#">#14</a>  | Estimated number of participants needed to achieve         | 16-18      |
| 37 |                           |                      | study objectives and how it was determined, including      |            |
| 38 |                           |                      | clinical and statistical assumptions supporting any        |            |
| 39 |                           |                      | sample size calculations                                   |            |
| 40 |                           |                      |                                                            |            |
| 41 |                           |                      |                                                            |            |
| 42 |                           |                      |                                                            |            |
| 43 | Recruitment               | <a href="#">#15</a>  | Strategies for achieving adequate participant enrolment    | 18-19      |
| 44 |                           |                      | to reach target sample size                                |            |
| 45 |                           |                      |                                                            |            |
| 46 |                           |                      |                                                            |            |
| 47 | <b>Methods:</b>           |                      |                                                            |            |
| 48 | <b>Assignment of</b>      |                      |                                                            |            |
| 49 | <b>interventions (for</b> |                      |                                                            |            |
| 50 | <b>controlled trials)</b> |                      |                                                            |            |
| 51 |                           |                      |                                                            |            |
| 52 |                           |                      |                                                            |            |
| 53 |                           |                      |                                                            |            |
| 54 | Allocation: sequence      | <a href="#">#16a</a> | Method of generating the allocation sequence (eg,          | 15-16      |
| 55 | generation                |                      | computer-generated random numbers), and list of any        |            |
| 56 |                           |                      | factors for stratification. To reduce predictability of a  |            |
| 57 |                           |                      |                                                            |            |
| 58 |                           |                      |                                                            |            |
| 59 |                           |                      |                                                            |            |
| 60 |                           |                      |                                                            |            |



random sequence, details of any planned restriction (eg, blocking) should be provided in a separate document that is unavailable to those who enrol participants or assign interventions

|    |                        |                      |                                                                  |
|----|------------------------|----------------------|------------------------------------------------------------------|
| 1  |                        |                      |                                                                  |
| 2  |                        |                      |                                                                  |
| 3  |                        |                      |                                                                  |
| 4  |                        |                      |                                                                  |
| 5  |                        |                      |                                                                  |
| 6  |                        |                      |                                                                  |
| 7  | Allocation             | <a href="#">#16b</a> | Mechanism of implementing the allocation sequence (eg, 15-16     |
| 8  | concealment            |                      | central telephone; sequentially numbered, opaque,                |
| 9  | mechanism              |                      | sealed envelopes), describing any steps to conceal the           |
| 10 |                        |                      | sequence until interventions are assigned                        |
| 11 |                        |                      |                                                                  |
| 12 |                        |                      |                                                                  |
| 13 |                        |                      |                                                                  |
| 14 | Allocation:            | <a href="#">#16c</a> | Who will generate the allocation sequence, who will enrol 15-16  |
| 15 | implementation         |                      | participants, and who will assign participants to                |
| 16 |                        |                      | interventions                                                    |
| 17 |                        |                      |                                                                  |
| 18 |                        |                      |                                                                  |
| 19 |                        |                      |                                                                  |
| 20 | Blinding (masking)     | <a href="#">#17a</a> | Who will be blinded after assignment to interventions (eg, 15-16 |
| 21 |                        |                      | trial participants, care providers, outcome assessors,           |
| 22 |                        |                      | data analysts), and how                                          |
| 23 |                        |                      |                                                                  |
| 24 |                        |                      |                                                                  |
| 25 | Blinding (masking):    | <a href="#">#17b</a> | If blinded, circumstances under which unblinding is 16           |
| 26 | emergency unblinding   |                      | permissible, and procedure for revealing a participant's         |
| 27 |                        |                      | allocated intervention during the trial                          |
| 28 |                        |                      |                                                                  |
| 29 |                        |                      |                                                                  |
| 30 |                        |                      |                                                                  |
| 31 | <b>Methods: Data</b>   |                      |                                                                  |
| 32 | <b>collection,</b>     |                      |                                                                  |
| 33 | <b>management, and</b> |                      |                                                                  |
| 34 | <b>analysis</b>        |                      |                                                                  |
| 35 |                        |                      |                                                                  |
| 36 |                        |                      |                                                                  |
| 37 |                        |                      |                                                                  |
| 38 | Data collection plan   | <a href="#">#18a</a> | Plans for assessment and collection of outcome, 16-18,           |
| 39 |                        |                      | baseline, and other trial data, including any related            |
| 40 |                        |                      | processes to promote data quality (eg, duplicate                 |
| 41 |                        |                      | measurements, training of assessors) and a description           |
| 42 |                        |                      | of study instruments (eg, questionnaires, laboratory             |
| 43 |                        |                      | tests) along with their reliability and validity, if known.      |
| 44 |                        |                      | Reference to where data collection forms can be found, if        |
| 45 |                        |                      | not in the protocol                                              |
| 46 |                        |                      |                                                                  |
| 47 |                        |                      |                                                                  |
| 48 |                        |                      |                                                                  |
| 49 |                        |                      |                                                                  |
| 50 |                        |                      |                                                                  |
| 51 | Data collection plan:  | <a href="#">#18b</a> | Plans to promote participant retention and complete 18-19        |
| 52 | retention              |                      | follow-up, including list of any outcome data to be              |
| 53 |                        |                      | collected for participants who discontinue or deviate from       |
| 54 |                        |                      | intervention protocols                                           |
| 55 |                        |                      |                                                                  |
| 56 |                        |                      |                                                                  |
| 57 |                        |                      |                                                                  |
| 58 | Data management        | <a href="#">#19</a>  | Plans for data entry, coding, security, and storage, 24          |
| 59 |                        |                      |                                                                  |
| 60 |                        |                      |                                                                  |

including any related processes to promote data quality (eg, double data entry; range checks for data values). Reference to where details of data management procedures can be found, if not in the protocol

|    |                                                  |                      |                                                                                                                                                                                                                                                                                                                                       |
|----|--------------------------------------------------|----------------------|---------------------------------------------------------------------------------------------------------------------------------------------------------------------------------------------------------------------------------------------------------------------------------------------------------------------------------------|
| 1  |                                                  |                      |                                                                                                                                                                                                                                                                                                                                       |
| 2  |                                                  |                      |                                                                                                                                                                                                                                                                                                                                       |
| 3  |                                                  |                      |                                                                                                                                                                                                                                                                                                                                       |
| 4  |                                                  |                      |                                                                                                                                                                                                                                                                                                                                       |
| 5  |                                                  |                      |                                                                                                                                                                                                                                                                                                                                       |
| 6  |                                                  |                      |                                                                                                                                                                                                                                                                                                                                       |
| 7  | Statistics: outcomes                             | <a href="#">#20a</a> | Statistical methods for analysing primary and secondary outcomes. Reference to where other details of the statistical analysis plan can be found, if not in the protocol                                                                                                                                                              |
| 8  |                                                  |                      | 16-18                                                                                                                                                                                                                                                                                                                                 |
| 9  |                                                  |                      |                                                                                                                                                                                                                                                                                                                                       |
| 10 |                                                  |                      |                                                                                                                                                                                                                                                                                                                                       |
| 11 |                                                  |                      |                                                                                                                                                                                                                                                                                                                                       |
| 12 |                                                  |                      |                                                                                                                                                                                                                                                                                                                                       |
| 13 |                                                  |                      |                                                                                                                                                                                                                                                                                                                                       |
| 14 | Statistics: additional analyses                  | <a href="#">#20b</a> | Methods for any additional analyses (eg, subgroup and adjusted analyses)                                                                                                                                                                                                                                                              |
| 15 |                                                  |                      | 17-18                                                                                                                                                                                                                                                                                                                                 |
| 16 |                                                  |                      |                                                                                                                                                                                                                                                                                                                                       |
| 17 |                                                  |                      |                                                                                                                                                                                                                                                                                                                                       |
| 18 | Statistics: analysis population and missing data | <a href="#">#20c</a> | Definition of analysis population relating to protocol non-adherence (eg, as randomised analysis), and any statistical methods to handle missing data (eg, multiple imputation)                                                                                                                                                       |
| 19 |                                                  |                      | 17-18                                                                                                                                                                                                                                                                                                                                 |
| 20 |                                                  |                      |                                                                                                                                                                                                                                                                                                                                       |
| 21 |                                                  |                      |                                                                                                                                                                                                                                                                                                                                       |
| 22 |                                                  |                      |                                                                                                                                                                                                                                                                                                                                       |
| 23 |                                                  |                      |                                                                                                                                                                                                                                                                                                                                       |
| 24 |                                                  |                      |                                                                                                                                                                                                                                                                                                                                       |
| 25 | <b>Methods: Monitoring</b>                       |                      |                                                                                                                                                                                                                                                                                                                                       |
| 26 |                                                  |                      |                                                                                                                                                                                                                                                                                                                                       |
| 27 |                                                  |                      |                                                                                                                                                                                                                                                                                                                                       |
| 28 | Data monitoring: formal committee                | <a href="#">#21a</a> | Composition of data monitoring committee (DMC); summary of its role and reporting structure; statement of whether it is independent from the sponsor and competing interests; and reference to where further details about its charter can be found, if not in the protocol. Alternatively, an explanation of why a DMC is not needed |
| 29 |                                                  |                      | 17, 19-21                                                                                                                                                                                                                                                                                                                             |
| 30 |                                                  |                      |                                                                                                                                                                                                                                                                                                                                       |
| 31 |                                                  |                      |                                                                                                                                                                                                                                                                                                                                       |
| 32 |                                                  |                      |                                                                                                                                                                                                                                                                                                                                       |
| 33 |                                                  |                      |                                                                                                                                                                                                                                                                                                                                       |
| 34 |                                                  |                      |                                                                                                                                                                                                                                                                                                                                       |
| 35 |                                                  |                      |                                                                                                                                                                                                                                                                                                                                       |
| 36 |                                                  |                      |                                                                                                                                                                                                                                                                                                                                       |
| 37 |                                                  |                      |                                                                                                                                                                                                                                                                                                                                       |
| 38 |                                                  |                      |                                                                                                                                                                                                                                                                                                                                       |
| 39 | Data monitoring: interim analysis                | <a href="#">#21b</a> | Description of any interim analyses and stopping guidelines, including who will have access to these interim results and make the final decision to terminate the trial                                                                                                                                                               |
| 40 |                                                  |                      | 19-21                                                                                                                                                                                                                                                                                                                                 |
| 41 |                                                  |                      |                                                                                                                                                                                                                                                                                                                                       |
| 42 |                                                  |                      |                                                                                                                                                                                                                                                                                                                                       |
| 43 |                                                  |                      |                                                                                                                                                                                                                                                                                                                                       |
| 44 |                                                  |                      |                                                                                                                                                                                                                                                                                                                                       |
| 45 |                                                  |                      |                                                                                                                                                                                                                                                                                                                                       |
| 46 | Harms                                            | <a href="#">#22</a>  | Plans for collecting, assessing, reporting, and managing solicited and spontaneously reported adverse events and other unintended effects of trial interventions or trial conduct                                                                                                                                                     |
| 47 |                                                  |                      | 19-21                                                                                                                                                                                                                                                                                                                                 |
| 48 |                                                  |                      |                                                                                                                                                                                                                                                                                                                                       |
| 49 |                                                  |                      |                                                                                                                                                                                                                                                                                                                                       |
| 50 |                                                  |                      |                                                                                                                                                                                                                                                                                                                                       |
| 51 |                                                  |                      |                                                                                                                                                                                                                                                                                                                                       |
| 52 |                                                  |                      |                                                                                                                                                                                                                                                                                                                                       |
| 53 | Auditing                                         | <a href="#">#23</a>  | Frequency and procedures for auditing trial conduct, if any, and whether the process will be independent from investigators and the sponsor                                                                                                                                                                                           |
| 54 |                                                  |                      | 19-21                                                                                                                                                                                                                                                                                                                                 |
| 55 |                                                  |                      |                                                                                                                                                                                                                                                                                                                                       |
| 56 |                                                  |                      |                                                                                                                                                                                                                                                                                                                                       |
| 57 |                                                  |                      |                                                                                                                                                                                                                                                                                                                                       |
| 58 |                                                  |                      |                                                                                                                                                                                                                                                                                                                                       |
| 59 |                                                  |                      |                                                                                                                                                                                                                                                                                                                                       |
| 60 |                                                  |                      |                                                                                                                                                                                                                                                                                                                                       |

## Ethics and dissemination

|    |                          |                      |                                                                |       |
|----|--------------------------|----------------------|----------------------------------------------------------------|-------|
| 1  | <b>Ethics and</b>        |                      |                                                                |       |
| 2  | <b>dissemination</b>     |                      |                                                                |       |
| 3  |                          |                      |                                                                |       |
| 4  |                          |                      |                                                                |       |
| 5  | Research ethics          | <a href="#">#24</a>  | Plans for seeking research ethics committee /                  | 22    |
| 6  | approval                 |                      | institutional review board (REC / IRB) approval                |       |
| 7  |                          |                      |                                                                |       |
| 8  |                          |                      |                                                                |       |
| 9  | Protocol amendments      | <a href="#">#25</a>  | Plans for communicating important protocol modifications       | 22    |
| 10 |                          |                      | (eg, changes to eligibility criteria, outcomes, analyses) to   |       |
| 11 |                          |                      | relevant parties (eg, investigators, REC / IRBs, trial         |       |
| 12 |                          |                      | participants, trial registries, journals, regulators)          |       |
| 13 |                          |                      |                                                                |       |
| 14 |                          |                      |                                                                |       |
| 15 |                          |                      |                                                                |       |
| 16 | Consent or assent        | <a href="#">#26a</a> | Who will obtain informed consent or assent from potential      | 23    |
| 17 |                          |                      | trial participants or authorised surrogates, and how (see      |       |
| 18 |                          |                      | Item 32)                                                       |       |
| 19 |                          |                      |                                                                |       |
| 20 |                          |                      |                                                                |       |
| 21 | Consent or assent:       | <a href="#">#26b</a> | Additional consent provisions for collection and use of        | NA    |
| 22 | ancillary studies        |                      | participant data and biological specimens in ancillary         |       |
| 23 |                          |                      | studies, if applicable                                         |       |
| 24 |                          |                      |                                                                |       |
| 25 |                          |                      |                                                                |       |
| 26 |                          |                      |                                                                |       |
| 27 | Confidentiality          | <a href="#">#27</a>  | How personal information about potential and enrolled          | 24    |
| 28 |                          |                      | participants will be collected, shared, and maintained in      |       |
| 29 |                          |                      | order to protect confidentiality before, during, and after     |       |
| 30 |                          |                      | the trial                                                      |       |
| 31 |                          |                      |                                                                |       |
| 32 |                          |                      |                                                                |       |
| 33 |                          |                      |                                                                |       |
| 34 | Declaration of           | <a href="#">#28</a>  | Financial and other competing interests for principal          | 34    |
| 35 | interests                |                      | investigators for the overall trial and each study site        |       |
| 36 |                          |                      |                                                                |       |
| 37 |                          |                      |                                                                |       |
| 38 | Data access              | <a href="#">#29</a>  | Statement of who will have access to the final trial           | 34    |
| 39 |                          |                      | dataset, and disclosure of contractual agreements that         |       |
| 40 |                          |                      | limit such access for investigators                            |       |
| 41 |                          |                      |                                                                |       |
| 42 |                          |                      |                                                                |       |
| 43 |                          |                      |                                                                |       |
| 44 | Ancillary and post trial | <a href="#">#30</a>  | Provisions, if any, for ancillary and post-trial care, and for | 19,22 |
| 45 | care                     |                      | compensation to those who suffer harm from trial               |       |
| 46 |                          |                      | participation                                                  |       |
| 47 |                          |                      |                                                                |       |
| 48 |                          |                      |                                                                |       |
| 49 | Dissemination policy:    | <a href="#">#31a</a> | Plans for investigators and sponsor to communicate trial       | 21,22 |
| 50 | trial results            |                      | results to participants, healthcare professionals, the         |       |
| 51 |                          |                      | public, and other relevant groups (eg, via publication,        |       |
| 52 |                          |                      | reporting in results databases, or other data sharing          |       |
| 53 |                          |                      | arrangements), including any publication restrictions          |       |
| 54 |                          |                      |                                                                |       |
| 55 |                          |                      |                                                                |       |
| 56 |                          |                      |                                                                |       |
| 57 |                          |                      |                                                                |       |
| 58 | Dissemination policy:    | <a href="#">#31b</a> | Authorship eligibility guidelines and any intended use of      | 25    |
| 59 |                          |                      |                                                                |       |
| 60 |                          |                      |                                                                |       |

|    |                       |                                                                                 |          |
|----|-----------------------|---------------------------------------------------------------------------------|----------|
| 1  | authorship            | professional writers                                                            |          |
| 2  |                       |                                                                                 |          |
| 3  | Dissemination policy: | <a href="#">#31c</a> Plans, if any, for granting public access to the full      | 34       |
| 4  | reproducible research | protocol, participant-level dataset, and statistical code                       |          |
| 5  |                       |                                                                                 |          |
| 6  | <b>Appendices</b>     |                                                                                 |          |
| 7  |                       |                                                                                 |          |
| 8  |                       |                                                                                 |          |
| 9  | Informed consent      | <a href="#">#32</a> Model consent form and other related documentation          | Appendix |
| 10 | materials             | given to participants and authorised surrogates                                 | 1        |
| 11 |                       |                                                                                 |          |
| 12 |                       |                                                                                 |          |
| 13 | Biological specimens  | <a href="#">#33</a> Plans for collection, laboratory evaluation, and storage of | NA       |
| 14 |                       | biological specimens for genetic or molecular analysis in                       |          |
| 15 |                       | the current trial and for future use in ancillary studies, if                   |          |
| 16 |                       | applicable                                                                      |          |
| 17 |                       |                                                                                 |          |
| 18 |                       |                                                                                 |          |
| 19 |                       |                                                                                 |          |
| 20 | .                     |                                                                                 |          |
| 21 |                       |                                                                                 |          |
| 22 |                       |                                                                                 |          |
| 23 |                       |                                                                                 |          |
| 24 |                       |                                                                                 |          |
| 25 |                       |                                                                                 |          |
| 26 |                       |                                                                                 |          |
| 27 |                       |                                                                                 |          |
| 28 |                       |                                                                                 |          |
| 29 |                       |                                                                                 |          |
| 30 |                       |                                                                                 |          |
| 31 |                       |                                                                                 |          |
| 32 |                       |                                                                                 |          |
| 33 |                       |                                                                                 |          |
| 34 |                       |                                                                                 |          |
| 35 |                       |                                                                                 |          |
| 36 |                       |                                                                                 |          |
| 37 |                       |                                                                                 |          |
| 38 |                       |                                                                                 |          |
| 39 |                       |                                                                                 |          |
| 40 |                       |                                                                                 |          |
| 41 |                       |                                                                                 |          |
| 42 |                       |                                                                                 |          |
| 43 |                       |                                                                                 |          |
| 44 |                       |                                                                                 |          |
| 45 |                       |                                                                                 |          |
| 46 |                       |                                                                                 |          |
| 47 |                       |                                                                                 |          |
| 48 |                       |                                                                                 |          |
| 49 |                       |                                                                                 |          |
| 50 |                       |                                                                                 |          |
| 51 |                       |                                                                                 |          |
| 52 |                       |                                                                                 |          |
| 53 |                       |                                                                                 |          |
| 54 |                       |                                                                                 |          |
| 55 |                       |                                                                                 |          |
| 56 |                       |                                                                                 |          |
| 57 |                       |                                                                                 |          |
| 58 |                       |                                                                                 |          |
| 59 |                       |                                                                                 |          |
| 60 |                       |                                                                                 |          |

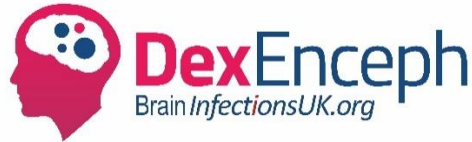

## RCT Adult with Capacity Information Sheet

Version 5.0, 25 May 2018

DexEnceph: A study of dexamethasone in adults with Herpes Simplex Virus (HSV) encephalitis  
Brain Infections Group, University of Liverpool

We understand this is a difficult and stressful time for you, so we firstly want to thank you for taking the time to read this leaflet.

You are being invited to take part in a research study on HSV encephalitis. This condition is extremely rare and is probably something you had never heard about before. This is why a team member will go through this leaflet with you, explaining what taking part in the study would involve and answering any questions.

### Important things you need to know

- This is a study for patients with encephalitis (swelling of the brain) caused by a virus called herpes simplex virus (HSV).
- Encephalitis can make you confused, drowsy, behave out of character, affect your sleep and memory, change your mood or may cause you to have fits.
- We want to find out if reducing the swelling with a drug called dexamethasone is of benefit to patient's memory in the longer term.
- In the study there will be two groups of patients, one that receives dexamethasone and one that does not.
- If you are in the group that receives dexamethasone this will be for 4 days in hospital.
- Both groups will have the same investigations to see if dexamethasone has been of benefit.
- Dexamethasone is a commonly used drug in brain swelling and many other conditions. Like all medicines, dexamethasone has side-effects. We will explain what these can be later.

### We would like to invite you to take part in a research study

- Before you decide to take part it is important you know why the research is being done and what it will involve.
- You can discuss with family, friends and clinical staff before making a decision.
- You are free to decide whether you would like to take part.
- If you choose to take part and then decide you no longer want to be involved you can stop taking part without giving a reason. Your care will not be affected.
- Please let us know if there is anything in this leaflet that is not clear or if you would like more information. A member of our team will answer your questions.
- If you decide to take part we will offer you a copy of this form and ask you to sign a consent form.

## HSV encephalitis

### 1. What is HSV encephalitis?

Encephalitis means swelling of the brain and has many different causes. It is often caused by a virus. Herpes Simplex Virus (HSV) is the most common virus that causes encephalitis in the UK.

HSV encephalitis is very rare. It is diagnosed by finding the virus in fluid around the brain and spinal cord. This fluid is called CSF (cerebrospinal fluid). The CSF is obtained by the doctor who performs a lumbar puncture (LP).

HSV encephalitis is treated with the drug aciclovir. Despite treatment, some people are left with significant loss of memory. About 2 out of every 3 people will have memory difficulties long term.

## The study

### 2. Why are we doing this study?

We know dexamethasone can reduce swelling. Reduction in swelling of the brain may improve the recovery of patients with HSV encephalitis.

This study, called DexEnceph, will allow us to compare the recovery of patients that received dexamethasone and those that did not.

### 3. Why have I been invited to take part?

There are two reasons why you may have been invited to take part:

**A.** Your doctors have diagnosed you with having HSV encephalitis.

**OR**

**B.** You may have been invited to take part before the diagnosis is made. This is because your doctors think there is a chance you may have HSV encephalitis. This will mean you have more time to think about taking part.

### 4. What will happen to me during the study?

All patients in the study will receive aciclovir. This is standard treatment for HSV encephalitis.

In addition, if you decide to take part in the study, you may be offered a short course of dexamethasone. This will be decided at random by a computer. This is to be fair, so neither you, your doctor, nor the research team, can choose whether you receive dexamethasone or not. Half of the people in the study will receive dexamethasone and half will not.

If you receive dexamethasone this will be 4 times a day for 4 days. It is given in a line you already have for clinical care.

## What taking part involves

### 5. What tests are done if I take part?

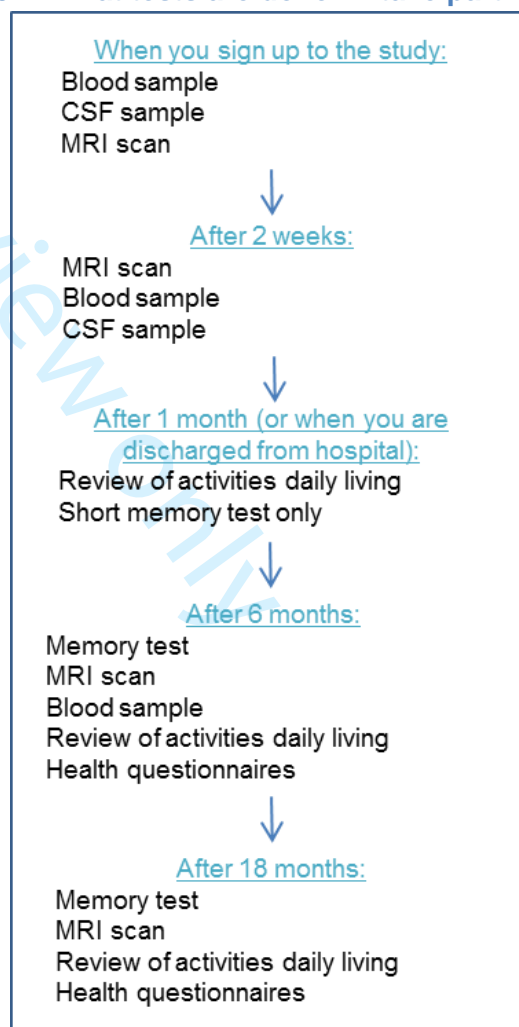

All the tests done when you sign up to the study and the CSF tests after 2 weeks will

be done as part of your care whether you take part in the study or not.

## 6. What do the memory tests involve?

These tests are the most important in the study as they will help us find out if dexamethasone improves memory problems from HSV encephalitis. These tests are sometimes called Neuropsychology tests. They are completed 6 and 18 months after the illness.

The key part of this test takes about 35 minutes. If you are not too tired we can continue with further tests that will provide useful information. These can take up to 2 hours.

They are not pass or fail tests. They provide information about your memory and thinking processes.

They can be done in one day or divided over a few short visits. If you have left hospital we can travel to see you in a convenient place for you. The test will be arranged on a day(s) which suits you.

The results can be added to your hospital notes for future reference if you wish or kept confidential within the trial.

## 7. What does the MRI scan involve?

As part of your care your doctor will organise an MRI scan when you are in hospital. If you take part in the study we will ask you to have another 3 scans later on.

MRI scans allow us to assess if the brain has been affected by the infection and, if so, which parts.

Each scan takes about 20 minutes. The scan can be noisy but you will be offered headphones.

The extra 3 scans are planned for:

- 2 weeks after the first one (when you are still in hospital)
- After 6 months
- After 18 months

The scans will be done at a hospital near you. We will reimburse mileage or public transport costs for any research visits.

We will check with you that you are still happy to have the scan each time. Sometimes scans may find something not related to this illness. If this happens the doctors looking at the scans will tell your own hospital doctors who will look into this further.

None of the research scans are compulsory so if you do not wish to have them you can still be part of the study.

## 8. Are there risks to having an MRI scan?

There are no known risks from an MRI scan. They do not use radiation. MRI scans are done routinely in patients with HSV encephalitis.

Because MRI scans use strong magnets you will not have the scan if you have any metal implants or fragments in your body.

Where you lie is quite enclosed and some people may find this unsettling. If you have a fear of confined spaces you should discuss this with your doctor before you go for the scan.

If you think you may be pregnant let your local research team know. We will not ask pregnant women to have MRI scans due to possible risks to the foetus.

## 9. What samples are collected? What does this involve?

We will collect blood and CSF samples during the study.

All patients with HSV encephalitis need a lumbar puncture (LP) when they come to hospital to find out why they are unwell. The doctor uses a small needle to take a sample from the lower part of the back. This is repeated after 2 weeks of treatment to see if all the virus has gone. Both lumbar punctures are part of the standard care in all patients with this condition.

We will take a little extra fluid at this time for the research tests. The amount of fluid we ask for each time is about 1 teaspoon, 5.5mls.

If you have already had a lumbar puncture before being told about the study, we will take stored CSF that is leftover for research tests.

Blood tests are requested at 3 different times spread over 6 months. We take between 1 to 4 teaspoons of blood, this is 5 to 23mls.

With these blood and CSF tests we will be able to better understand how the infection affects your body and how the body tries to defend itself against it.

#### 10. What will happen to the samples that are collected? Will any genetic tests be done?

All samples will be taken at your hospital and then transported to the University of Liverpool or other laboratories supporting the study. The samples will not have any of your personal information written on them. In the University they will be stored in a secure building.

There is an option for the blood and CSF collected to have tests looking at DNA. DNA is found in all cells of the body and contains the genetic information for the working of all human beings. This study collects DNA samples to find out why some people get HSV encephalitis and others do not, and why some people have severe problems due to HSV and others do not. The information we learn from DNA may benefit others with this condition in the future but will not influence your treatment or your future health.

Some of your samples may be left over. We will ask you if they can be used for this and future studies run by the University of Liverpool.

#### 11. How do you review activities of daily living?

We will find out how the illness has affected your day-to-day life.

The research team will look at your hospital notes. They may also talk to you and, if you choose, your relatives. This will happen when you are in hospital and when you have gone home.

We will compare patients who received dexamethasone to those that did not and see if it made a difference.

#### 12. What are the health questionnaires?

Two questionnaires will be sent through the post. They will ask you your views about your health and quality of life. Please send them back in a pre-paid envelope.

#### Dexamethasone

#### 13. What are the side effects of dexamethasone?

Dexamethasone is used widely in patients and the side-effects are well known as this medicine has been prescribed for a long time. A short course of dexamethasone will be prescribed in this study. Side effects are less common when dexamethasone is given for shorter periods.

It is important you know about the possible side-effects before you decide to take part. These are:

- Stomach pain, indigestion, having more appetite than usual, feeling or being sick.
- Feeling tired or fatigued
- Mood and behaviour changes, especially at the beginning.
- Higher blood sugars.

Other possible risks can include:

- Stomach ulcers and bleeding of ulcers.
- Decreased response to infections.



You will be in hospital when you take dexamethasone so you can tell your doctors immediately if you have any problem.

If you suffer side effects you or your doctor can decide to stop the dexamethasone at any point.

Dexamethasone is prescribed to women who are pregnant or breast feeding as there are no known risks to the foetus.

### Other things to consider

#### 14. Do I have to take part?

No, taking part is voluntary. If you agree, we will ask you to sign a consent form.

If you agree to take part you are free to change your mind at any time, without giving a reason. You may decide to have only some tests in the study without having to drop out of the study altogether. This will not affect the standard of care you receive.

If you withdraw from the study we will stop collecting data. We will ask you if we can use the information and samples we have gathered up to the point that you withdraw.

#### 15. What happens if there is a problem?

If you have any concerns about any part of this study, please speak with your hospital doctor (consultant) or one of your research team.

If you remain unhappy and wish to complain formally you can do this using the NHS Complaints Procedure. You can get information on how to do this from the Patients Advice Liaison department (PALS) in your hospital.

If you suffer harm from taking part in this study, there are no special compensation arrangements. If harm occurs to you and it is due to someone's negligence, you may have grounds for legal action for compensation against the NHS hospital where you are being treated but you may have to pay your legal costs.

#### 16. Who will know I have taken part in this study?

Only people in your clinical care team and people involved in the study will have access to personal data. With your consent we will tell your GP that you are taking part.

All information collected about you during this study will be confidential and anonymised. It will be handled, stored and destroyed in accordance with the General Data Protection Regulation.

University of Liverpool is the sponsor for this study based in the United Kingdom. We will be using information from you and your medical records in order to undertake this study and will act as the data controller for this study. This means that we are responsible for looking after your information and using it properly. University of Liverpool will keep identifiable information about you for 15 years after the study has finished.

Your rights to access, change or move your information are limited, as we need to manage your information in specific ways in order for the research to be reliable and accurate. If you withdraw from the study, we will keep the information about you that we have already obtained. To safeguard your rights, we will use the minimum personally-identifiable information possible.

You can find out more about how we use your information <http://www.dexenceph.org.uk/>. Our Data Protection Officer is Victoria Heath and you can contact them at [V.Heath@liverpool.ac.uk](mailto:V.Heath@liverpool.ac.uk).

### Benefits and risks

#### 17. What are the benefits of taking part?

You may benefit from receiving dexamethasone, however we will not know this until the end of the study. You

1  
2  
3 may also benefit from the increased  
4 monitoring of having extra scans and  
5 memory tests.

6 The information we get from this study  
7 may benefit patients in the future.  
8  
9

10 **18. What are the possible**  
11 **disadvantages and risks of taking**  
12 **part?**  
13

14 The disadvantage in taking part in this  
15 study may be the risk of having the side-  
16 effects of dexamethasone listed in  
17 question 13 (this will not be the case if you  
18 are in the group that does not have  
19 dexamethasone).  
20

21 There is the inconvenience of having  
22 the dexamethasone through the drip when  
23 you are in hospital. Once you leave  
24 hospital there is the inconvenience of  
25 travelling to hospital for 2 scans, having  
26 the memory tests and completing  
27 questionnaires.  
28  
29

30  
31 **Contact details**  
32

33 If you have any questions about this study,  
34 then please contact the study team  
35 members:  
36  
37

38 Principal Investigator (Doctor leading this  
39 study in your hospital):

40 Name: \_\_\_\_\_  
41  
42

43  
44  
45 Telephone: \_\_\_\_\_  
46  
47

48 Research Nurse:

49 Name: \_\_\_\_\_  
50  
51

52  
53  
54 Telephone: \_\_\_\_\_  
55  
56

57  
58  
59 Name of your Hospital: \_\_\_\_\_  
60

**Further information**

This study is being run at your hospital and many other NHS hospitals throughout the UK. It aims to recruit 90 patients over 4 years.

It is organised by the University of Liverpool and is funded by the National Institute for Health Research (NIHR), the public body in charge of research in the UK.

Our study team includes The Encephalitis Society, a charity that supports patients and families ([www.encephalitis.info](http://www.encephalitis.info)).

The study has been reviewed for scientific content by expert members of NIHR. The National Research Ethics Service Committee Liverpool Central has reviewed the study and given approval for it to take place.

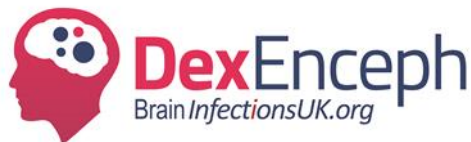

### RCT Adult with Capacity Consent Form

Version 5.0, Dated: 25/May/2018

EudraCT Number: 2015-001609-16

Centre Name:

Centre Code:

Name of Principal Investigator:

Study Number:

Please complete this form. When completed give one copy to the participant to keep, send one copy to CTU [fax/encrypted email/post], and keep one in the participant's medical notes. Please put the original in the site file.

**For patient: once you have understood each statement please initial the YES OR NO box**

**YES****NO**

|                                                                                                                                                                                                                                                                                                                                             |                   |                  |
|---------------------------------------------------------------------------------------------------------------------------------------------------------------------------------------------------------------------------------------------------------------------------------------------------------------------------------------------|-------------------|------------------|
| 1. I confirm I have read and understand the Information Leaflet (dated DD/MM/YY) for the above study, and have had the opportunity to ask questions and have these answered satisfactorily.                                                                                                                                                 | INITIAL<br>IF YES | INITIAL<br>IF NO |
| 2. I agree to take part in this study.                                                                                                                                                                                                                                                                                                      | INITIAL<br>IF YES | INITIAL<br>IF NO |
| 3. I understand that my participation is voluntary and that I am free to withdraw from the study at any time without giving a reason and without my care or legal rights being affected.                                                                                                                                                    | INITIAL<br>IF YES | INITIAL<br>IF NO |
| 4. I agree for my consent form and contact details to be passed to the University of Liverpool for the administration of the study.                                                                                                                                                                                                         | INITIAL<br>IF YES | INITIAL<br>IF NO |
| 5. I understand that relevant sections of my medical notes and any data collected during the study may be looked at by authorised individuals from the research and clinical team and Regulatory Authorities where it is relevant to my taking part in this research. I give permission for these individuals to have access to my records. | INITIAL<br>IF YES | INITIAL<br>IF NO |
| 6. I agree for genetic tests to be done on blood and CSF collected. I understand these genetic tests will not be of any individual significance to me.                                                                                                                                                                                      | INITIAL<br>IF YES | INITIAL<br>IF NO |

7. I agree to have MRI scans as part of the trial.

|                   |                  |
|-------------------|------------------|
| INITIAL<br>IF YES | INITIAL<br>IF NO |
|-------------------|------------------|

8. I agree for my GP and hospital doctors to be informed if the scan picks up something unexpected.

|                   |                  |
|-------------------|------------------|
| INITIAL<br>IF YES | INITIAL<br>IF NO |
|-------------------|------------------|

9. I agree to gift the remainder of any blood or CSF sample to the University of Liverpool where it will be stored for use in future research. This may include genetic tests.

|                   |                  |
|-------------------|------------------|
| INITIAL<br>IF YES | INITIAL<br>IF NO |
|-------------------|------------------|

10. I agree to any images or scans that are taken to be used for teaching, education and publication (in scientific journals, books or internet).

|                   |                  |
|-------------------|------------------|
| INITIAL<br>IF YES | INITIAL<br>IF NO |
|-------------------|------------------|

11. I agree for my GP to be informed I am taking part in this study.

|                   |                  |
|-------------------|------------------|
| INITIAL<br>IF YES | INITIAL<br>IF NO |
|-------------------|------------------|

\_\_\_\_\_  
Name of Participant  
(Please print)

\_\_\_\_\_  
Signature

\_\_\_\_\_  
Date (DD/MM/YYYY)

\_\_\_\_\_  
Researcher\*

\_\_\_\_\_  
Signature

\_\_\_\_\_  
Date (DD/MM/YYYY)

**\* Important:** Prior to signing please ensure local research contact details are complete on page 6.

Information to Research Team:

Once a Consent Form has been signed, please copy three times: One for the participant, one to file in the medical notes and fax/post/encrypted email one to CTU. Please place original in the site file.

Please fax/encrypt email/post this consent form to CTU **separately** to other anonymised trial documents (e.g. CRF).
